# Supplementary material for: Selective targeting BMP2 and 4 in SMAD4 negative esophageal adenocarcinoma inhibits tumor growth and aggressiveness in preclinical models
Source: Cell Oncol (Dordr). 2022 Jul 28;45(4):639–58. doi: 10.1007/s13402-022-00689-2 (PMC9333053; doi:10.1007/s13402-022-00689-2)
Supplement: Supplementary file 11 — (XLSX 113 kb) [file 13402_2022_689_MOESM6_ESM.xlsx]

## Sheet: Blad1
NAME	GS<br> follow link to MSigDB	GS DETAILS	SIZE	ES	NES	NOM p-val	FDR q-val	FWER p-val	RANK AT MAX	LEADING EDGE
REACTOME_MAP3K8_TPL2_DEPENDENT_MAPK1_3_ACTIVATION	REACTOME_MAP3K8_TPL2_DEPENDENT_MAPK1_3_ACTIVATION	Details ...	16	0.778271	1.88335	0	0.791948	0.303	6329	tags=63%, list=12%, signal=71%
REACTOME_RIP_MEDIATED_NFKB_ACTIVATION_VIA_ZBP1	REACTOME_RIP_MEDIATED_NFKB_ACTIVATION_VIA_ZBP1	Details ...	17	0.782639	1.90421	0.0021322	1	0.27	3670	tags=47%, list=7%, signal=50%
REACTOME_CELL_CELL_JUNCTION_ORGANIZATION	REACTOME_CELL_CELL_JUNCTION_ORGANIZATION	Details ...	64	0.485176	1.89279	0.00318471	1	0.286	9934	tags=39%, list=18%, signal=48%
REACTOME_RECYCLING_PATHWAY_OF_L1	REACTOME_RECYCLING_PATHWAY_OF_L1	Details ...	49	0.510468	1.7301	0.0074813	0.704076	0.624	12812	tags=51%, list=24%, signal=67%
REACTOME_RAS_ACTIVATION_UPON_CA2_INFLUX_THROUGH_NMDA_RECEPTOR	REACTOME_RAS_ACTIVATION_UPON_CA2_INFLUX_THROUGH_NMDA_RECEPTOR	Details ...	20	0.562043	1.89102	0.00857143	0.977619	0.288	2937	tags=30%, list=5%, signal=32%
REACTOME_TIGHT_JUNCTION_INTERACTIONS	REACTOME_TIGHT_JUNCTION_INTERACTIONS	Details ...	29	0.519771	1.73539	0.00882353	0.71832	0.616	9732	tags=38%, list=18%, signal=46%
REACTOME_ASSEMBLY_OF_THE_HIV_VIRION	REACTOME_ASSEMBLY_OF_THE_HIV_VIRION	Details ...	16	0.762086	1.85886	0.00883002	0.679975	0.355	6329	tags=63%, list=12%, signal=71%
REACTOME_JNK_C_JUN_KINASES_PHOSPHORYLATION_AND_ACTIVATION_MEDIATED_BY_ACTIVATED_HUMAN_TAK1	REACTOME_JNK_C_JUN_KINASES_PHOSPHORYLATION_AND_ACTIVATION_MEDIATED_BY_ACTIVATED_HUMAN_TAK1	Details ...	22	0.677436	1.84012	0.0111857	0.546807	0.402	8043	tags=55%, list=15%, signal=64%
REACTOME_P75NTR_SIGNALS_VIA_NF_KB	REACTOME_P75NTR_SIGNALS_VIA_NF_KB	Details ...	16	0.70593	1.85247	0.0114416	0.61787	0.373	6329	tags=56%, list=12%, signal=64%
REACTOME_TAK1_ACTIVATES_NFKB_BY_PHOSPHORYLATION_AND_ACTIVATION_OF_IKKS_COMPLEX	REACTOME_TAK1_ACTIVATES_NFKB_BY_PHOSPHORYLATION_AND_ACTIVATION_OF_IKKS_COMPLEX	Details ...	32	0.631833	1.87634	0.0130435	0.678559	0.318	6329	tags=50%, list=12%, signal=57%
REACTOME_ADHERENS_JUNCTIONS_INTERACTIONS	REACTOME_ADHERENS_JUNCTIONS_INTERACTIONS	Details ...	33	0.500842	1.75244	0.0135501	0.823511	0.586	5980	tags=36%, list=11%, signal=41%
REACTOME_CELL_CELL_COMMUNICATION	REACTOME_CELL_CELL_COMMUNICATION	Details ...	129	0.44451	1.73688	0.0136612	0.754451	0.615	10677	tags=40%, list=20%, signal=50%
REACTOME_EPHB_MEDIATED_FORWARD_SIGNALING	REACTOME_EPHB_MEDIATED_FORWARD_SIGNALING	Details ...	42	0.605956	1.85114	0.0136674	0.546667	0.375	7424	tags=48%, list=14%, signal=55%
REACTOME_SENSORY_PROCESSING_OF_SOUND_BY_OUTER_HAIR_CELLS_OF_THE_COCHLEA	REACTOME_SENSORY_PROCESSING_OF_SOUND_BY_OUTER_HAIR_CELLS_OF_THE_COCHLEA		55	0.444411	1.6645	0.0137741	0.65096	0.726	6385	tags=36%, list=12%, signal=41%
REACTOME_GLYCOGEN_STORAGE_DISEASES	REACTOME_GLYCOGEN_STORAGE_DISEASES	Details ...	16	0.643743	1.7751	0.0139535	0.886075	0.541	6329	tags=56%, list=12%, signal=64%
REACTOME_GAP_JUNCTION_TRAFFICKING_AND_REGULATION	REACTOME_GAP_JUNCTION_TRAFFICKING_AND_REGULATION		51	0.469547	1.66261	0.014245	0.583636	0.728	12812	tags=51%, list=24%, signal=67%
REACTOME_TICAM1_RIP1_MEDIATED_IKK_COMPLEX_RECRUITMENT	REACTOME_TICAM1_RIP1_MEDIATED_IKK_COMPLEX_RECRUITMENT	Details ...	19	0.674467	1.77277	0.0150862	0.820763	0.545	10084	tags=58%, list=19%, signal=71%
REACTOME_CREB1_PHOSPHORYLATION_THROUGH_NMDA_RECEPTOR_MEDIATED_ACTIVATION_OF_RAS_SIGNALING	REACTOME_CREB1_PHOSPHORYLATION_THROUGH_NMDA_RECEPTOR_MEDIATED_ACTIVATION_OF_RAS_SIGNALING		28	0.511931	1.7047	0.0157068	0.690478	0.659	2937	tags=29%, list=5%, signal=30%
REACTOME_BIOSYNTHESIS_OF_SPECIALIZED_PRORESOLVING_MEDIATORS_SPMS	REACTOME_BIOSYNTHESIS_OF_SPECIALIZED_PRORESOLVING_MEDIATORS_SPMS		19	0.488325	1.65833	0.021148	0.555815	0.731	3457	tags=32%, list=6%, signal=34%
REACTOME_TP53_REGULATES_TRANSCRIPTION_OF_CELL_DEATH_GENES	REACTOME_TP53_REGULATES_TRANSCRIPTION_OF_CELL_DEATH_GENES		44	0.520374	1.65264	0.0215311	0.53528	0.741	14036	tags=68%, list=26%, signal=92%
REACTOME_NEPHRIN_FAMILY_INTERACTIONS	REACTOME_NEPHRIN_FAMILY_INTERACTIONS		23	0.548317	1.66783	0.0238663	0.680379	0.724	9309	tags=57%, list=17%, signal=68%
REACTOME_ZBP1_DAI_MEDIATED_INDUCTION_OF_TYPE_I_IFNS	REACTOME_ZBP1_DAI_MEDIATED_INDUCTION_OF_TYPE_I_IFNS	Details ...	21	0.663844	1.71269	0.0246637	0.756854	0.646	9653	tags=52%, list=18%, signal=64%
REACTOME_GLUCONEOGENESIS	REACTOME_GLUCONEOGENESIS	Details ...	33	0.602885	1.74881	0.0254042	0.785262	0.59	6597	tags=45%, list=12%, signal=52%
REACTOME_GLYCOGEN_SYNTHESIS	REACTOME_GLYCOGEN_SYNTHESIS		16	0.686523	1.70525	0.0263158	0.721231	0.658	6660	tags=63%, list=12%, signal=71%
REACTOME_TRAF6_MEDIATED_INDUCTION_OF_TAK1_COMPLEX_WITHIN_TLR4_COMPLEX	REACTOME_TRAF6_MEDIATED_INDUCTION_OF_TAK1_COMPLEX_WITHIN_TLR4_COMPLEX	Details ...	16	0.633653	1.71131	0.02746	0.725451	0.648	6329	tags=50%, list=12%, signal=57%
REACTOME_INTERLEUKIN_17_SIGNALING	REACTOME_INTERLEUKIN_17_SIGNALING		71	0.547565	1.69237	0.0280778	0.664513	0.679	6329	tags=42%, list=12%, signal=48%
REACTOME_ONCOGENIC_MAPK_SIGNALING	REACTOME_ONCOGENIC_MAPK_SIGNALING		82	0.494601	1.66425	0.0285714	0.631699	0.726	12576	tags=54%, list=23%, signal=70%
REACTOME_RA_BIOSYNTHESIS_PATHWAY	REACTOME_RA_BIOSYNTHESIS_PATHWAY	Details ...	22	0.550917	1.76817	0.0291777	0.782296	0.553	6968	tags=41%, list=13%, signal=47%
REACTOME_SIGNALING_BY_RETINOIC_ACID	REACTOME_SIGNALING_BY_RETINOIC_ACID		43	0.466932	1.66361	0.0295699	0.597039	0.726	11318	tags=44%, list=21%, signal=56%
REACTOME_ACTIVATED_TAK1_MEDIATES_P38_MAPK_ACTIVATION	REACTOME_ACTIVATED_TAK1_MEDIATES_P38_MAPK_ACTIVATION	Details ...	23	0.651038	1.73811	0.0301724	0.796204	0.614	6329	tags=52%, list=12%, signal=59%
REACTOME_DOWNREGULATION_OF_ERBB2_SIGNALING	REACTOME_DOWNREGULATION_OF_ERBB2_SIGNALING		29	0.481933	1.5886	0.0304569	0.498119	0.812	6329	tags=38%, list=12%, signal=43%
REACTOME_METABOLISM_OF_NITRIC_OXIDE_NOS3_ACTIVATION_AND_REGULATION	REACTOME_METABOLISM_OF_NITRIC_OXIDE_NOS3_ACTIVATION_AND_REGULATION		15	0.624294	1.6829	0.0307018	0.655949	0.694	10441	tags=60%, list=19%, signal=74%
REACTOME_TP53_REGULATES_TRANSCRIPTION_OF_GENES_INVOLVED_IN_CYTOCHROME_C_RELEASE	REACTOME_TP53_REGULATES_TRANSCRIPTION_OF_GENES_INVOLVED_IN_CYTOCHROME_C_RELEASE		20	0.5575	1.64066	0.0324074	0.565341	0.757	7387	tags=60%, list=14%, signal=70%
REACTOME_SIGNALING_BY_MODERATE_KINASE_ACTIVITY_BRAF_MUTANTS	REACTOME_SIGNALING_BY_MODERATE_KINASE_ACTIVITY_BRAF_MUTANTS		45	0.49162	1.6272	0.0348028	0.526231	0.77	10804	tags=49%, list=20%, signal=61%
REACTOME_CLATHRIN_MEDIATED_ENDOCYTOSIS	REACTOME_CLATHRIN_MEDIATED_ENDOCYTOSIS		145	0.459645	1.62111	0.035545	0.515224	0.773	11619	tags=48%, list=22%, signal=61%
REACTOME_CARGO_RECOGNITION_FOR_CLATHRIN_MEDIATED_ENDOCYTOSIS	REACTOME_CARGO_RECOGNITION_FOR_CLATHRIN_MEDIATED_ENDOCYTOSIS		105	0.440678	1.59994	0.0360577	0.514107	0.795	11619	tags=47%, list=22%, signal=59%
REACTOME_UPTAKE_AND_ACTIONS_OF_BACTERIAL_TOXINS	REACTOME_UPTAKE_AND_ACTIONS_OF_BACTERIAL_TOXINS		29	0.49834	1.57613	0.0365535	0.495267	0.819	12184	tags=45%, list=23%, signal=58%
REACTOME_DISEASES_OF_CARBOHYDRATE_METABOLISM	REACTOME_DISEASES_OF_CARBOHYDRATE_METABOLISM		34	0.522141	1.62763	0.0365854	0.535842	0.768	8908	tags=47%, list=17%, signal=56%
REACTOME_TNFR1_INDUCED_NFKAPPAB_SIGNALING_PATHWAY	REACTOME_TNFR1_INDUCED_NFKAPPAB_SIGNALING_PATHWAY		30	0.583397	1.66542	0.037037	0.668409	0.726	16273	tags=70%, list=30%, signal=100%
REACTOME_SIGNALING_BY_HIPPO	REACTOME_SIGNALING_BY_HIPPO		20	0.631137	1.61069	0.0388769	0.509934	0.784	1409	tags=25%, list=3%, signal=26%
REACTOME_RAF_ACTIVATION	REACTOME_RAF_ACTIVATION		34	0.585149	1.68413	0.0392157	0.674326	0.691	10804	tags=59%, list=20%, signal=74%
REACTOME_TP53_REGULATES_METABOLIC_GENES	REACTOME_TP53_REGULATES_METABOLIC_GENES		83	0.51044	1.66025	0.0402542	0.561231	0.729	9575	tags=40%, list=18%, signal=48%
REACTOME_REGULATION_OF_MECP2_EXPRESSION_AND_ACTIVITY	REACTOME_REGULATION_OF_MECP2_EXPRESSION_AND_ACTIVITY		32	0.551496	1.58801	0.0402685	0.492536	0.813	15567	tags=59%, list=29%, signal=83%
REACTOME_BUDDING_AND_MATURATION_OF_HIV_VIRION	REACTOME_BUDDING_AND_MATURATION_OF_HIV_VIRION		28	0.636674	1.69274	0.04329	0.69018	0.679	6329	tags=50%, list=12%, signal=57%
REACTOME_PLASMA_LIPOPROTEIN_CLEARANCE	REACTOME_PLASMA_LIPOPROTEIN_CLEARANCE		33	0.523455	1.6328	0.0444444	0.565906	0.766	10048	tags=45%, list=19%, signal=56%
REACTOME_RHOBTB2_GTPASE_CYCLE	REACTOME_RHOBTB2_GTPASE_CYCLE		23	0.653477	1.66864	0.045098	0.701309	0.724	4027	tags=39%, list=7%, signal=42%
REACTOME_OVARIAN_TUMOR_DOMAIN_PROTEASES	REACTOME_OVARIAN_TUMOR_DOMAIN_PROTEASES		38	0.582722	1.66213	0.0451467	0.569506	0.728	9231	tags=50%, list=17%, signal=60%
REACTOME_CELL_JUNCTION_ORGANIZATION	REACTOME_CELL_JUNCTION_ORGANIZATION		91	0.419926	1.5763	0.045977	0.501852	0.818	10677	tags=37%, list=20%, signal=47%
REACTOME_ASSEMBLY_AND_CELL_SURFACE_PRESENTATION_OF_NMDA_RECEPTORS	REACTOME_ASSEMBLY_AND_CELL_SURFACE_PRESENTATION_OF_NMDA_RECEPTORS		44	0.414174	1.49374	0.0461095	0.502279	0.894	13693	tags=43%, list=25%, signal=58%
REACTOME_IKK_COMPLEX_RECRUITMENT_MEDIATED_BY_RIP1	REACTOME_IKK_COMPLEX_RECRUITMENT_MEDIATED_BY_RIP1		23	0.541462	1.62294	0.0467091	0.51865	0.771	10084	tags=48%, list=19%, signal=59%
REACTOME_INTERLEUKIN_1_SIGNALING	REACTOME_INTERLEUKIN_1_SIGNALING		102	0.557093	1.70334	0.0475162	0.66701	0.661	7397	tags=39%, list=14%, signal=45%
REACTOME_SENSORY_PROCESSING_OF_SOUND	REACTOME_SENSORY_PROCESSING_OF_SOUND		77	0.381259	1.50723	0.0484848	0.499529	0.883	6534	tags=30%, list=12%, signal=34%
REACTOME_RHO_GTPASES_ACTIVATE_IQGAPS	REACTOME_RHO_GTPASES_ACTIVATE_IQGAPS		32	0.509145	1.54645	0.0488372	0.484801	0.858	12812	tags=53%, list=24%, signal=70%
REACTOME_LISTERIA_MONOCYTOGENES_ENTRY_INTO_HOST_CELLS	REACTOME_LISTERIA_MONOCYTOGENES_ENTRY_INTO_HOST_CELLS		20	0.600941	1.59401	0.049676	0.498644	0.805	8350	tags=55%, list=16%, signal=65%
REACTOME_HSF1_DEPENDENT_TRANSACTIVATION	REACTOME_HSF1_DEPENDENT_TRANSACTIVATION		38	0.556362	1.59957	0.0501393	0.506754	0.797	9588	tags=53%, list=18%, signal=64%
REACTOME_INTERLEUKIN_1_FAMILY_SIGNALING	REACTOME_INTERLEUKIN_1_FAMILY_SIGNALING		140	0.500313	1.65662	0.0506912	0.54752	0.731	7584	tags=36%, list=14%, signal=41%
REACTOME_NEUREXINS_AND_NEUROLIGINS	REACTOME_NEUREXINS_AND_NEUROLIGINS		56	0.380951	1.40265	0.0508475	0.442172	0.937	13693	tags=45%, list=25%, signal=60%
REACTOME_SIGNALING_BY_BRAF_AND_RAF_FUSIONS	REACTOME_SIGNALING_BY_BRAF_AND_RAF_FUSIONS		65	0.476612	1.59292	0.050885	0.493681	0.806	12576	tags=52%, list=23%, signal=68%
REACTOME_REGULATION_OF_TNFR1_SIGNALING	REACTOME_REGULATION_OF_TNFR1_SIGNALING		35	0.548131	1.61054	0.0509978	0.501545	0.784	9880	tags=49%, list=18%, signal=59%
REACTOME_RAS_PROCESSING	REACTOME_RAS_PROCESSING		24	0.57341	1.66388	0.0525114	0.614048	0.726	13574	tags=63%, list=25%, signal=84%
REACTOME_DOWNSTREAM_SIGNAL_TRANSDUCTION	REACTOME_DOWNSTREAM_SIGNAL_TRANSDUCTION		29	0.545559	1.562	0.0528634	0.486155	0.84	10323	tags=52%, list=19%, signal=64%
REACTOME_PINK1_PRKN_MEDIATED_MITOPHAGY	REACTOME_PINK1_PRKN_MEDIATED_MITOPHAGY		21	0.627184	1.6302	0.0532151	0.550295	0.767	6329	tags=43%, list=12%, signal=49%
REACTOME_EPH_EPHRIN_MEDIATED_REPULSION_OF_CELLS	REACTOME_EPH_EPHRIN_MEDIATED_REPULSION_OF_CELLS		51	0.450842	1.53201	0.0539846	0.505545	0.869	11619	tags=43%, list=22%, signal=55%
REACTOME_NUCLEAR_RECEPTOR_TRANSCRIPTION_PATHWAY	REACTOME_NUCLEAR_RECEPTOR_TRANSCRIPTION_PATHWAY		53	0.422275	1.49245	0.0561497	0.486936	0.894	13257	tags=45%, list=25%, signal=60%
REACTOME_TOLL_LIKE_RECEPTOR_9_TLR9_CASCADE	REACTOME_TOLL_LIKE_RECEPTOR_9_TLR9_CASCADE		94	0.505387	1.61623	0.0579399	0.510896	0.779	7405	tags=40%, list=14%, signal=47%
REACTOME_EPH_EPHRIN_SIGNALING	REACTOME_EPH_EPHRIN_SIGNALING		92	0.456685	1.57051	0.0586797	0.49614	0.825	7799	tags=38%, list=14%, signal=44%
REACTOME_TRAF6_MEDIATED_NF_KB_ACTIVATION	REACTOME_TRAF6_MEDIATED_NF_KB_ACTIVATION		24	0.54982	1.56801	0.0594714	0.490048	0.828	2877	tags=33%, list=5%, signal=35%
REACTOME_ACTIVATION_OF_BAD_AND_TRANSLOCATION_TO_MITOCHONDRIA	REACTOME_ACTIVATION_OF_BAD_AND_TRANSLOCATION_TO_MITOCHONDRIA		15	0.590999	1.56853	0.0595745	0.495271	0.828	2728	tags=33%, list=5%, signal=35%
REACTOME_GAB1_SIGNALOSOME	REACTOME_GAB1_SIGNALOSOME		17	0.573163	1.56776	0.0598504	0.477937	0.828	11395	tags=59%, list=21%, signal=75%
REACTOME_DIGESTION_AND_ABSORPTION	REACTOME_DIGESTION_AND_ABSORPTION		27	0.428244	1.52287	0.0606061	0.490093	0.871	10974	tags=44%, list=20%, signal=56%
REACTOME_GLYCOLYSIS	REACTOME_GLYCOLYSIS		71	0.556141	1.6564	0.0620843	0.534723	0.732	8493	tags=41%, list=16%, signal=48%
REACTOME_HSP90_CHAPERONE_CYCLE_FOR_STEROID_HORMONE_RECEPTORS_SHR	REACTOME_HSP90_CHAPERONE_CYCLE_FOR_STEROID_HORMONE_RECEPTORS_SHR		57	0.475051	1.57589	0.0625	0.488702	0.819	10515	tags=46%, list=20%, signal=57%
REACTOME_NR1H2_AND_NR1H3_MEDIATED_SIGNALING	REACTOME_NR1H2_AND_NR1H3_MEDIATED_SIGNALING		47	0.46813	1.51421	0.0626506	0.492144	0.878	8512	tags=30%, list=16%, signal=35%
REACTOME_TGF_BETA_RECEPTOR_SIGNALING_IN_EMT_EPITHELIAL_TO_MESENCHYMAL_TRANSITION	REACTOME_TGF_BETA_RECEPTOR_SIGNALING_IN_EMT_EPITHELIAL_TO_MESENCHYMAL_TRANSITION		16	0.612385	1.62904	0.0631579	0.542339	0.767	6329	tags=50%, list=12%, signal=57%
REACTOME_P75_NTR_RECEPTOR_MEDIATED_SIGNALLING	REACTOME_P75_NTR_RECEPTOR_MEDIATED_SIGNALLING		97	0.439909	1.52629	0.0633484	0.492872	0.869	8375	tags=37%, list=16%, signal=44%
REACTOME_GLUCOSE_METABOLISM	REACTOME_GLUCOSE_METABOLISM		91	0.53053	1.63621	0.0653153	0.567205	0.762	8493	tags=40%, list=16%, signal=47%
REACTOME_RHO_GTPASES_ACTIVATE_WASPS_AND_WAVES	REACTOME_RHO_GTPASES_ACTIVATE_WASPS_AND_WAVES		36	0.534558	1.52834	0.0655738	0.497855	0.869	7424	tags=50%, list=14%, signal=58%
REACTOME_CIRCADIAN_CLOCK	REACTOME_CIRCADIAN_CLOCK		70	0.477883	1.53043	0.0658174	0.503679	0.869	12488	tags=54%, list=23%, signal=71%
REACTOME_MAPK_FAMILY_SIGNALING_CASCADES	REACTOME_MAPK_FAMILY_SIGNALING_CASCADES		327	0.351016	1.43107	0.0658228	0.434073	0.924	10804	tags=34%, list=20%, signal=43%
REACTOME_SIGNALING_BY_ROBO_RECEPTORS	REACTOME_SIGNALING_BY_ROBO_RECEPTORS		218	0.509971	1.6034	0.0669456	0.513447	0.794	10891	tags=47%, list=20%, signal=59%
REACTOME_NEGATIVE_REGULATION_OF_NMDA_RECEPTOR_MEDIATED_NEURONAL_TRANSMISSION	REACTOME_NEGATIVE_REGULATION_OF_NMDA_RECEPTOR_MEDIATED_NEURONAL_TRANSMISSION		21	0.470964	1.48875	0.0685714	0.478521	0.895	5227	tags=29%, list=10%, signal=32%
REACTOME_RIPK1_MEDIATED_REGULATED_NECROSIS	REACTOME_RIPK1_MEDIATED_REGULATED_NECROSIS		29	0.585517	1.61316	0.0696629	0.511136	0.783	7170	tags=45%, list=13%, signal=52%
REACTOME_AGGREPHAGY	REACTOME_AGGREPHAGY		44	0.431689	1.47137	0.0699301	0.439243	0.907	12812	tags=45%, list=24%, signal=60%
REACTOME_METABOLISM_OF_AMINO_ACIDS_AND_DERIVATIVES	REACTOME_METABOLISM_OF_AMINO_ACIDS_AND_DERIVATIVES		374	0.441396	1.56782	0.0700935	0.484137	0.828	10316	tags=38%, list=19%, signal=46%
REACTOME_GLYCOGEN_METABOLISM	REACTOME_GLYCOGEN_METABOLISM		27	0.526549	1.52339	0.0702179	0.494118	0.87	8908	tags=56%, list=17%, signal=67%
REACTOME_NEGATIVE_REGULATION_OF_MET_ACTIVITY	REACTOME_NEGATIVE_REGULATION_OF_MET_ACTIVITY		21	0.553215	1.54955	0.0706638	0.494369	0.854	8350	tags=43%, list=16%, signal=51%
REACTOME_RND1_GTPASE_CYCLE	REACTOME_RND1_GTPASE_CYCLE		42	0.498429	1.54801	0.0711207	0.49245	0.857	13562	tags=50%, list=25%, signal=67%
REACTOME_ACTIVATED_NOTCH1_TRANSMITS_SIGNAL_TO_THE_NUCLEUS	REACTOME_ACTIVATED_NOTCH1_TRANSMITS_SIGNAL_TO_THE_NUCLEUS		31	0.468686	1.49088	0.0712589	0.477423	0.894	8922	tags=39%, list=17%, signal=46%
REACTOME_LDL_CLEARANCE	REACTOME_LDL_CLEARANCE		19	0.581757	1.55952	0.0719257	0.486311	0.844	11619	tags=53%, list=22%, signal=67%
REACTOME_REGULATION_OF_SIGNALING_BY_CBL	REACTOME_REGULATION_OF_SIGNALING_BY_CBL		22	0.541454	1.49529	0.0720339	0.502897	0.893	9309	tags=50%, list=17%, signal=60%
REACTOME_LATE_ENDOSOMAL_MICROAUTOPHAGY	REACTOME_LATE_ENDOSOMAL_MICROAUTOPHAGY		34	0.500373	1.50909	0.0728477	0.50005	0.883	6329	tags=41%, list=12%, signal=47%
REACTOME_THE_CANONICAL_RETINOID_CYCLE_IN_RODS_TWILIGHT_VISION	REACTOME_THE_CANONICAL_RETINOID_CYCLE_IN_RODS_TWILIGHT_VISION		23	0.423677	1.41164	0.0744337	0.4348	0.93	7618	tags=39%, list=14%, signal=46%
REACTOME_SIGNALING_BY_EGFR_IN_CANCER	REACTOME_SIGNALING_BY_EGFR_IN_CANCER		25	0.539367	1.6236	0.0748792	0.526515	0.771	6329	tags=44%, list=12%, signal=50%
REACTOME_TNFR2_NON_CANONICAL_NF_KB_PATHWAY	REACTOME_TNFR2_NON_CANONICAL_NF_KB_PATHWAY		100	0.478887	1.58657	0.0755149	0.488769	0.814	7397	tags=34%, list=14%, signal=39%
REACTOME_SIGNALING_BY_ERBB2	REACTOME_SIGNALING_BY_ERBB2		50	0.446238	1.50071	0.0763889	0.499902	0.888	7976	tags=36%, list=15%, signal=42%
REACTOME_TNF_SIGNALING	REACTOME_TNF_SIGNALING		44	0.512381	1.52213	0.0767544	0.48685	0.871	9880	tags=43%, list=18%, signal=53%
REACTOME_METABOLISM_OF_AMINE_DERIVED_HORMONES	REACTOME_METABOLISM_OF_AMINE_DERIVED_HORMONES		18	0.407667	1.38731	0.0777027	0.440732	0.942	10316	tags=33%, list=19%, signal=41%
REACTOME_RND2_GTPASE_CYCLE	REACTOME_RND2_GTPASE_CYCLE		43	0.494294	1.50249	0.0809628	0.500415	0.887	10686	tags=47%, list=20%, signal=58%
REACTOME_TRANSPORT_OF_CONNEXONS_TO_THE_PLASMA_MEMBRANE	REACTOME_TRANSPORT_OF_CONNEXONS_TO_THE_PLASMA_MEMBRANE		21	0.478979	1.43899	0.0813008	0.437318	0.921	12812	tags=48%, list=24%, signal=62%
REACTOME_PROLACTIN_RECEPTOR_SIGNALING	REACTOME_PROLACTIN_RECEPTOR_SIGNALING		15	0.521198	1.47533	0.0820399	0.447288	0.902	13140	tags=60%, list=24%, signal=79%
REACTOME_NEGATIVE_REGULATION_OF_MAPK_PATHWAY	REACTOME_NEGATIVE_REGULATION_OF_MAPK_PATHWAY		43	0.504839	1.54749	0.0829596	0.488289	0.858	4952	tags=37%, list=9%, signal=41%
REACTOME_NONSENSE_MEDIATED_DECAY_NMD	REACTOME_NONSENSE_MEDIATED_DECAY_NMD		116	0.645623	1.63186	0.0855397	0.556568	0.766	10891	tags=60%, list=20%, signal=75%
REACTOME_SPRY_REGULATION_OF_FGF_SIGNALING	REACTOME_SPRY_REGULATION_OF_FGF_SIGNALING		16	0.618802	1.48798	0.0862423	0.47622	0.896	9142	tags=69%, list=17%, signal=83%
REACTOME_DECTIN_1_MEDIATED_NONCANONICAL_NF_KB_SIGNALING	REACTOME_DECTIN_1_MEDIATED_NONCANONICAL_NF_KB_SIGNALING		62	0.581633	1.5973	0.0865191	0.505529	0.801	7397	tags=42%, list=14%, signal=49%
REACTOME_MAPK6_MAPK4_SIGNALING	REACTOME_MAPK6_MAPK4_SIGNALING		93	0.471663	1.52998	0.0875	0.498962	0.869	12890	tags=46%, list=24%, signal=61%
REACTOME_DEATH_RECEPTOR_SIGNALLING	REACTOME_DEATH_RECEPTOR_SIGNALLING		141	0.427954	1.47538	0.0888383	0.450686	0.902	10461	tags=40%, list=19%, signal=49%
REACTOME_REGULATION_OF_EXPRESSION_OF_SLITS_AND_ROBOS	REACTOME_REGULATION_OF_EXPRESSION_OF_SLITS_AND_ROBOS		172	0.553844	1.5945	0.0892495	0.505698	0.805	10298	tags=48%, list=19%, signal=59%
REACTOME_TOLL_LIKE_RECEPTOR_TLR1_TLR2_CASCADE	REACTOME_TOLL_LIKE_RECEPTOR_TLR1_TLR2_CASCADE		103	0.438114	1.50273	0.0901099	0.50478	0.885	8043	tags=37%, list=15%, signal=43%
REACTOME_WNT_LIGAND_BIOGENESIS_AND_TRAFFICKING	REACTOME_WNT_LIGAND_BIOGENESIS_AND_TRAFFICKING		26	0.436136	1.41849	0.0903614	0.43673	0.929	7642	tags=38%, list=14%, signal=45%
REACTOME_ACTIVATION_OF_IRF3_IRF7_MEDIATED_BY_TBK1_IKK_EPSILON	REACTOME_ACTIVATION_OF_IRF3_IRF7_MEDIATED_BY_TBK1_IKK_EPSILON		17	0.546067	1.47858	0.0905077	0.458176	0.899	12336	tags=65%, list=23%, signal=84%
REACTOME_TRANSLOCATION_OF_SLC2A4_GLUT4_TO_THE_PLASMA_MEMBRANE	REACTOME_TRANSLOCATION_OF_SLC2A4_GLUT4_TO_THE_PLASMA_MEMBRANE		72	0.448941	1.45309	0.0905077	0.447799	0.916	13357	tags=44%, list=25%, signal=59%
REACTOME_METABOLISM_OF_PORPHYRINS	REACTOME_METABOLISM_OF_PORPHYRINS		27	0.50521	1.48471	0.0911215	0.471149	0.897	5254	tags=37%, list=10%, signal=41%
REACTOME_RESPONSE_OF_MTB_TO_PHAGOCYTOSIS	REACTOME_RESPONSE_OF_MTB_TO_PHAGOCYTOSIS		23	0.55825	1.51489	0.0914894	0.495649	0.877	11544	tags=70%, list=21%, signal=89%
REACTOME_CLEC7A_DECTIN_1_SIGNALING	REACTOME_CLEC7A_DECTIN_1_SIGNALING		100	0.506255	1.55047	0.092437	0.498031	0.854	12856	tags=49%, list=24%, signal=64%
REACTOME_ACTIVATION_OF_NMDA_RECEPTORS_AND_POSTSYNAPTIC_EVENTS	REACTOME_ACTIVATION_OF_NMDA_RECEPTORS_AND_POSTSYNAPTIC_EVENTS		94	0.345295	1.34455	0.0941828	0.441198	0.959	7407	tags=26%, list=14%, signal=30%
REACTOME_GAP_JUNCTION_ASSEMBLY	REACTOME_GAP_JUNCTION_ASSEMBLY		38	0.39487	1.38097	0.0943396	0.433916	0.943	10515	tags=37%, list=20%, signal=46%
REACTOME_INLB_MEDIATED_ENTRY_OF_LISTERIA_MONOCYTOGENES_INTO_HOST_CELL	REACTOME_INLB_MEDIATED_ENTRY_OF_LISTERIA_MONOCYTOGENES_INTO_HOST_CELL		15	0.575747	1.47143	0.0949074	0.442315	0.907	8350	tags=53%, list=16%, signal=63%
REACTOME_FATTY_ACIDS	REACTOME_FATTY_ACIDS		15	0.575874	1.47904	0.0954907	0.46464	0.899	13238	tags=67%, list=25%, signal=88%
REACTOME_NEGATIVE_REGULATION_OF_FGFR1_SIGNALING	REACTOME_NEGATIVE_REGULATION_OF_FGFR1_SIGNALING		33	0.428538	1.38552	0.097035	0.437227	0.943	7407	tags=36%, list=14%, signal=42%
REACTOME_RHOV_GTPASE_CYCLE	REACTOME_RHOV_GTPASE_CYCLE		33	0.573388	1.49363	0.0971922	0.497773	0.894	3396	tags=33%, list=6%, signal=36%
REACTOME_SIGNALING_BY_NTRK2_TRKB	REACTOME_SIGNALING_BY_NTRK2_TRKB		25	0.439443	1.4122	0.0994898	0.438667	0.93	4896	tags=36%, list=9%, signal=40%
REACTOME_SELECTIVE_AUTOPHAGY	REACTOME_SELECTIVE_AUTOPHAGY		81	0.445871	1.47025	0.0997783	0.438195	0.908	10515	tags=40%, list=20%, signal=49%
REACTOME_C_TYPE_LECTIN_RECEPTORS_CLRS	REACTOME_C_TYPE_LECTIN_RECEPTORS_CLRS		140	0.430646	1.47239	0.100703	0.446785	0.906	12890	tags=45%, list=24%, signal=59%
REACTOME_NEGATIVE_REGULATION_OF_FGFR4_SIGNALING	REACTOME_NEGATIVE_REGULATION_OF_FGFR4_SIGNALING		31	0.420067	1.3951	0.101064	0.439508	0.94	9142	tags=45%, list=17%, signal=54%
REACTOME_CELLULAR_RESPONSE_TO_HEAT_STRESS	REACTOME_CELLULAR_RESPONSE_TO_HEAT_STRESS		101	0.499874	1.53963	0.101266	0.496629	0.863	9588	tags=43%, list=18%, signal=52%
REACTOME_REGULATION_OF_TP53_EXPRESSION_AND_DEGRADATION	REACTOME_REGULATION_OF_TP53_EXPRESSION_AND_DEGRADATION		37	0.484155	1.48376	0.101732	0.469601	0.897	4353	tags=32%, list=8%, signal=35%
REACTOME_TRIGLYCERIDE_CATABOLISM	REACTOME_TRIGLYCERIDE_CATABOLISM		24	0.464004	1.41773	0.101928	0.432874	0.929	8126	tags=42%, list=15%, signal=49%
REACTOME_NEGATIVE_REGULATION_OF_FGFR3_SIGNALING	REACTOME_NEGATIVE_REGULATION_OF_FGFR3_SIGNALING		29	0.435358	1.41198	0.102757	0.436572	0.93	7407	tags=41%, list=14%, signal=48%
REACTOME_CYTOPROTECTION_BY_HMOX1	REACTOME_CYTOPROTECTION_BY_HMOX1		120	0.512152	1.55499	0.10387	0.492476	0.85	12488	tags=46%, list=23%, signal=60%
REACTOME_SIGNALING_BY_EGFR	REACTOME_SIGNALING_BY_EGFR		50	0.470034	1.46311	0.104167	0.439208	0.913	7407	tags=42%, list=14%, signal=49%
REACTOME_SIGNALING_BY_PDGFR_IN_DISEASE	REACTOME_SIGNALING_BY_PDGFR_IN_DISEASE		20	0.527756	1.44447	0.104701	0.443687	0.918	9309	tags=45%, list=17%, signal=54%
REACTOME_NUCLEOTIDE_BINDING_DOMAIN_LEUCINE_RICH_REPEAT_CONTAINING_RECEPTOR_NLR_SIGNALING_PATHWAYS	REACTOME_NUCLEOTIDE_BINDING_DOMAIN_LEUCINE_RICH_REPEAT_CONTAINING_RECEPTOR_NLR_SIGNALING_PATHWAYS		56	0.461485	1.44338	0.104784	0.439908	0.919	7910	tags=38%, list=15%, signal=44%
REACTOME_RHOF_GTPASE_CYCLE	REACTOME_RHOF_GTPASE_CYCLE		42	0.497173	1.45063	0.105832	0.449602	0.917	10721	tags=43%, list=20%, signal=53%
REACTOME_PENTOSE_PHOSPHATE_PATHWAY	REACTOME_PENTOSE_PHOSPHATE_PATHWAY		15	0.617846	1.48167	0.106061	0.470337	0.897	14409	tags=73%, list=27%, signal=100%
REACTOME_IRON_UPTAKE_AND_TRANSPORT	REACTOME_IRON_UPTAKE_AND_TRANSPORT		58	0.420958	1.44528	0.106236	0.445157	0.918	13529	tags=50%, list=25%, signal=67%
REACTOME_REGULATION_OF_TP53_ACTIVITY_THROUGH_METHYLATION	REACTOME_REGULATION_OF_TP53_ACTIVITY_THROUGH_METHYLATION		19	0.54955	1.44999	0.106719	0.444822	0.917	6329	tags=42%, list=12%, signal=48%
REACTOME_INOSITOL_PHOSPHATE_METABOLISM	REACTOME_INOSITOL_PHOSPHATE_METABOLISM		48	0.410953	1.38017	0.107843	0.433098	0.943	8643	tags=40%, list=16%, signal=47%
REACTOME_ERBB2_REGULATES_CELL_MOTILITY	REACTOME_ERBB2_REGULATES_CELL_MOTILITY		15	0.458694	1.359	0.108033	0.44028	0.955	5069	tags=33%, list=9%, signal=37%
REACTOME_UNBLOCKING_OF_NMDA_RECEPTORS_GLUTAMATE_BINDING_AND_ACTIVATION	REACTOME_UNBLOCKING_OF_NMDA_RECEPTORS_GLUTAMATE_BINDING_AND_ACTIVATION		21	0.436762	1.41848	0.108262	0.43423	0.929	2937	tags=24%, list=5%, signal=25%
REACTOME_CD209_DC_SIGN_SIGNALING	REACTOME_CD209_DC_SIGN_SIGNALING		21	0.507443	1.45009	0.108352	0.447733	0.917	6711	tags=43%, list=12%, signal=49%
REACTOME_APOPTOSIS	REACTOME_APOPTOSIS		179	0.430163	1.48119	0.108932	0.467525	0.898	14594	tags=51%, list=27%, signal=70%
REACTOME_CASPASE_ACTIVATION_VIA_DEATH_RECEPTORS_IN_THE_PRESENCE_OF_LIGAND	REACTOME_CASPASE_ACTIVATION_VIA_DEATH_RECEPTORS_IN_THE_PRESENCE_OF_LIGAND		16	0.590535	1.49308	0.110599	0.494445	0.894	3670	tags=38%, list=7%, signal=40%
REACTOME_L1CAM_INTERACTIONS	REACTOME_L1CAM_INTERACTIONS		121	0.333276	1.33565	0.111111	0.442611	0.96	11058	tags=34%, list=21%, signal=43%
REACTOME_DDX58_IFIH1_MEDIATED_INDUCTION_OF_INTERFERON_ALPHA_BETA	REACTOME_DDX58_IFIH1_MEDIATED_INDUCTION_OF_INTERFERON_ALPHA_BETA		81	0.416679	1.43877	0.111588	0.434989	0.921	11144	tags=43%, list=21%, signal=54%
REACTOME_CYTOSOLIC_SENSORS_OF_PATHOGEN_ASSOCIATED_DNA	REACTOME_CYTOSOLIC_SENSORS_OF_PATHOGEN_ASSOCIATED_DNA		62	0.469048	1.46371	0.113734	0.444256	0.912	10386	tags=48%, list=19%, signal=60%
REACTOME_NUCLEOBASE_CATABOLISM	REACTOME_NUCLEOBASE_CATABOLISM		35	0.388809	1.33243	0.115288	0.444285	0.96	10338	tags=40%, list=19%, signal=49%
REACTOME_SIGNALING_BY_ERBB4	REACTOME_SIGNALING_BY_ERBB4		58	0.330681	1.28931	0.115385	0.451834	0.969	9381	tags=33%, list=17%, signal=40%
REACTOME_HEME_DEGRADATION	REACTOME_HEME_DEGRADATION		15	0.520117	1.43503	0.115942	0.43486	0.923	10674	tags=53%, list=20%, signal=67%
REACTOME_DOWNSTREAM_SIGNALING_EVENTS_OF_B_CELL_RECEPTOR_BCR	REACTOME_DOWNSTREAM_SIGNALING_EVENTS_OF_B_CELL_RECEPTOR_BCR		81	0.505809	1.4878	0.116034	0.472467	0.896	12856	tags=49%, list=24%, signal=65%
REACTOME_DNA_DAMAGE_RECOGNITION_IN_GG_NER	REACTOME_DNA_DAMAGE_RECOGNITION_IN_GG_NER		38	0.582679	1.51911	0.1167	0.490227	0.876	16227	tags=74%, list=30%, signal=105%
REACTOME_TRANSCRIPTIONAL_ACTIVATION_OF_MITOCHONDRIAL_BIOGENESIS	REACTOME_TRANSCRIPTIONAL_ACTIVATION_OF_MITOCHONDRIAL_BIOGENESIS		55	0.494392	1.44086	0.116773	0.439068	0.921	9904	tags=42%, list=18%, signal=51%
REACTOME_DOWNREGULATION_OF_TGF_BETA_RECEPTOR_SIGNALING	REACTOME_DOWNREGULATION_OF_TGF_BETA_RECEPTOR_SIGNALING		26	0.483619	1.38539	0.117021	0.43522	0.943	6329	tags=46%, list=12%, signal=52%
REACTOME_EUKARYOTIC_TRANSLATION_INITIATION	REACTOME_EUKARYOTIC_TRANSLATION_INITIATION		120	0.644485	1.58259	0.11753	0.491605	0.815	10891	tags=62%, list=20%, signal=77%
REACTOME_ATTENUATION_PHASE	REACTOME_ATTENUATION_PHASE		28	0.552175	1.44368	0.118457	0.442285	0.918	9588	tags=57%, list=18%, signal=69%
REACTOME_NOD1_2_SIGNALING_PATHWAY	REACTOME_NOD1_2_SIGNALING_PATHWAY		36	0.480056	1.40593	0.118568	0.438116	0.937	16273	tags=67%, list=30%, signal=95%
REACTOME_INTERLEUKIN_12_SIGNALING	REACTOME_INTERLEUKIN_12_SIGNALING		46	0.466888	1.44851	0.118681	0.441743	0.917	13091	tags=50%, list=24%, signal=66%
REACTOME_TRANSCRIPTIONAL_REGULATION_OF_WHITE_ADIPOCYTE_DIFFERENTIATION	REACTOME_TRANSCRIPTIONAL_REGULATION_OF_WHITE_ADIPOCYTE_DIFFERENTIATION		84	0.400695	1.38974	0.118993	0.442863	0.941	9904	tags=43%, list=18%, signal=52%
REACTOME_FORMATION_OF_THE_CORNIFIED_ENVELOPE	REACTOME_FORMATION_OF_THE_CORNIFIED_ENVELOPE		129	0.567658	1.61661	0.119241	0.518981	0.778	6109	tags=45%, list=11%, signal=51%
REACTOME_SYNTHESIS_OF_ACTIVE_UBIQUITIN_ROLES_OF_E1_AND_E2_ENZYMES	REACTOME_SYNTHESIS_OF_ACTIVE_UBIQUITIN_ROLES_OF_E1_AND_E2_ENZYMES		30	0.566888	1.44937	0.11976	0.442971	0.917	10084	tags=50%, list=19%, signal=61%
REACTOME_CONSTITUTIVE_SIGNALING_BY_LIGAND_RESPONSIVE_EGFR_CANCER_VARIANTS	REACTOME_CONSTITUTIVE_SIGNALING_BY_LIGAND_RESPONSIVE_EGFR_CANCER_VARIANTS		19	0.515543	1.48544	0.120181	0.473512	0.896	6329	tags=42%, list=12%, signal=48%
REACTOME_BMAL1_CLOCK_NPAS2_ACTIVATES_CIRCADIAN_GENE_EXPRESSION	REACTOME_BMAL1_CLOCK_NPAS2_ACTIVATES_CIRCADIAN_GENE_EXPRESSION		27	0.49288	1.38818	0.121212	0.441188	0.941	10860	tags=41%, list=20%, signal=51%
REACTOME_RORA_ACTIVATES_GENE_EXPRESSION	REACTOME_RORA_ACTIVATES_GENE_EXPRESSION		18	0.606277	1.47772	0.121535	0.456597	0.9	9904	tags=50%, list=18%, signal=61%
REACTOME_MYD88_INDEPENDENT_TLR4_CASCADE	REACTOME_MYD88_INDEPENDENT_TLR4_CASCADE		97	0.456159	1.46367	0.121535	0.441113	0.912	9433	tags=40%, list=18%, signal=49%
REACTOME_KERATINIZATION	REACTOME_KERATINIZATION		217	0.428797	1.52684	0.121581	0.496754	0.869	7738	tags=35%, list=14%, signal=41%
REACTOME_HSF1_ACTIVATION	REACTOME_HSF1_ACTIVATION		31	0.523281	1.47151	0.121718	0.445502	0.907	13335	tags=65%, list=25%, signal=86%
REACTOME_MITOCHONDRIAL_CALCIUM_ION_TRANSPORT	REACTOME_MITOCHONDRIAL_CALCIUM_ION_TRANSPORT		23	0.539236	1.45863	0.122056	0.439515	0.914	7831	tags=43%, list=15%, signal=51%
REACTOME_RHOBTB_GTPASE_CYCLE	REACTOME_RHOBTB_GTPASE_CYCLE		35	0.528833	1.43746	0.123016	0.434824	0.921	6147	tags=37%, list=11%, signal=42%
REACTOME_GENE_AND_PROTEIN_EXPRESSION_BY_JAK_STAT_SIGNALING_AFTER_INTERLEUKIN_12_STIMULATION	REACTOME_GENE_AND_PROTEIN_EXPRESSION_BY_JAK_STAT_SIGNALING_AFTER_INTERLEUKIN_12_STIMULATION		37	0.483496	1.44146	0.12311	0.440801	0.921	13091	tags=54%, list=24%, signal=71%
REACTOME_NOTCH_HLH_TRANSCRIPTION_PATHWAY	REACTOME_NOTCH_HLH_TRANSCRIPTION_PATHWAY		28	0.48435	1.40853	0.123404	0.435579	0.934	11934	tags=46%, list=22%, signal=60%
REACTOME_LONG_TERM_POTENTIATION	REACTOME_LONG_TERM_POTENTIATION		23	0.397424	1.31085	0.12462	0.448616	0.964	2937	tags=22%, list=5%, signal=23%
REACTOME_ENDOSOMAL_SORTING_COMPLEX_REQUIRED_FOR_TRANSPORT_ESCRT	REACTOME_ENDOSOMAL_SORTING_COMPLEX_REQUIRED_FOR_TRANSPORT_ESCRT		31	0.558207	1.47899	0.125	0.460989	0.899	10464	tags=55%, list=19%, signal=68%
REACTOME_TRANSPORT_OF_INORGANIC_CATIONS_ANIONS_AND_AMINO_ACIDS_OLIGOPEPTIDES	REACTOME_TRANSPORT_OF_INORGANIC_CATIONS_ANIONS_AND_AMINO_ACIDS_OLIGOPEPTIDES		106	0.308296	1.27583	0.125348	0.44441	0.974	11611	tags=32%, list=22%, signal=41%
REACTOME_MITOPHAGY	REACTOME_MITOPHAGY		28	0.550494	1.46421	0.126638	0.446406	0.911	9861	tags=46%, list=18%, signal=57%
REACTOME_SIGNALING_BY_NOTCH1_HD_DOMAIN_MUTANTS_IN_CANCER	REACTOME_SIGNALING_BY_NOTCH1_HD_DOMAIN_MUTANTS_IN_CANCER		15	0.527144	1.41294	0.129412	0.439718	0.93	8248	tags=40%, list=15%, signal=47%
REACTOME_AUF1_HNRNP_D0_BINDS_AND_DESTABILIZES_MRNA	REACTOME_AUF1_HNRNP_D0_BINDS_AND_DESTABILIZES_MRNA		55	0.560447	1.4914	0.133065	0.480587	0.894	10298	tags=45%, list=19%, signal=56%
REACTOME_FLT3_SIGNALING_IN_DISEASE	REACTOME_FLT3_SIGNALING_IN_DISEASE		28	0.492763	1.42368	0.133333	0.43986	0.926	9381	tags=50%, list=17%, signal=61%
REACTOME_CELLULAR_RESPONSE_TO_HYPOXIA	REACTOME_CELLULAR_RESPONSE_TO_HYPOXIA		75	0.501753	1.47568	0.135246	0.453473	0.902	10298	tags=43%, list=19%, signal=53%
REACTOME_NR1H3_NR1H2_REGULATE_GENE_EXPRESSION_LINKED_TO_CHOLESTEROL_TRANSPORT_AND_EFFLUX	REACTOME_NR1H3_NR1H2_REGULATE_GENE_EXPRESSION_LINKED_TO_CHOLESTEROL_TRANSPORT_AND_EFFLUX		37	0.445981	1.38566	0.135747	0.441399	0.943	16248	tags=49%, list=30%, signal=70%
REACTOME_TRANSLESION_SYNTHESIS_BY_POLH	REACTOME_TRANSLESION_SYNTHESIS_BY_POLH		19	0.568694	1.39728	0.137577	0.442479	0.938	7211	tags=42%, list=13%, signal=49%
REACTOME_COPI_MEDIATED_ANTEROGRADE_TRANSPORT	REACTOME_COPI_MEDIATED_ANTEROGRADE_TRANSPORT		102	0.435504	1.42048	0.137712	0.435673	0.928	8826	tags=34%, list=16%, signal=41%
REACTOME_ACTIVATION_OF_BH3_ONLY_PROTEINS	REACTOME_ACTIVATION_OF_BH3_ONLY_PROTEINS		30	0.469826	1.40123	0.138462	0.439639	0.937	8043	tags=40%, list=15%, signal=47%
REACTOME_METABOLISM_OF_CARBOHYDRATES	REACTOME_METABOLISM_OF_CARBOHYDRATES		292	0.351087	1.34821	0.138614	0.44647	0.957	8939	tags=30%, list=17%, signal=36%
REACTOME_DEGRADATION_OF_GLI1_BY_THE_PROTEASOME	REACTOME_DEGRADATION_OF_GLI1_BY_THE_PROTEASOME		60	0.533812	1.49285	0.139165	0.490556	0.894	12856	tags=48%, list=24%, signal=63%
REACTOME_TP53_REGULATES_TRANSCRIPTION_OF_ADDITIONAL_CELL_CYCLE_GENES_WHOSE_EXACT_ROLE_IN_THE_P53_PATHWAY_REMAIN_UNCERTAIN	REACTOME_TP53_REGULATES_TRANSCRIPTION_OF_ADDITIONAL_CELL_CYCLE_GENES_WHOSE_EXACT_ROLE_IN_THE_P53_PATHWAY_REMAIN_UNCERTAIN		21	0.504731	1.39162	0.13924	0.441381	0.941	10888	tags=52%, list=20%, signal=66%
REACTOME_E3_UBIQUITIN_LIGASES_UBIQUITINATE_TARGET_PROTEINS	REACTOME_E3_UBIQUITIN_LIGASES_UBIQUITINATE_TARGET_PROTEINS		59	0.463822	1.38357	0.139344	0.431668	0.943	10580	tags=37%, list=20%, signal=46%
REACTOME_INTERLEUKIN_12_FAMILY_SIGNALING	REACTOME_INTERLEUKIN_12_FAMILY_SIGNALING		56	0.424415	1.38509	0.13964	0.433522	0.943	13091	tags=45%, list=24%, signal=59%
REACTOME_HOST_INTERACTIONS_OF_HIV_FACTORS	REACTOME_HOST_INTERACTIONS_OF_HIV_FACTORS		131	0.499497	1.49193	0.139721	0.483638	0.894	10746	tags=42%, list=20%, signal=52%
REACTOME_SIGNALING_BY_PTK6	REACTOME_SIGNALING_BY_PTK6		54	0.400959	1.34765	0.140143	0.445828	0.958	7363	tags=31%, list=14%, signal=36%
REACTOME_STIMULI_SENSING_CHANNELS	REACTOME_STIMULI_SENSING_CHANNELS		106	0.307717	1.2811	0.140351	0.442363	0.973	8471	tags=30%, list=16%, signal=36%
REACTOME_PROGRAMMED_CELL_DEATH	REACTOME_PROGRAMMED_CELL_DEATH		208	0.406708	1.38949	0.14059	0.441004	0.941	9390	tags=35%, list=17%, signal=42%
REACTOME_REGULATION_OF_HMOX1_EXPRESSION_AND_ACTIVITY	REACTOME_REGULATION_OF_HMOX1_EXPRESSION_AND_ACTIVITY		65	0.537651	1.47928	0.142292	0.467961	0.899	13720	tags=51%, list=25%, signal=68%
REACTOME_INFLUENZA_INFECTION	REACTOME_INFLUENZA_INFECTION		157	0.555714	1.49563	0.142857	0.507221	0.893	11619	tags=54%, list=22%, signal=69%
REACTOME_REGULATION_OF_HSF1_MEDIATED_HEAT_SHOCK_RESPONSE	REACTOME_REGULATION_OF_HSF1_MEDIATED_HEAT_SHOCK_RESPONSE		82	0.483497	1.44057	0.14405	0.436766	0.921	9588	tags=43%, list=18%, signal=52%
REACTOME_CELLULAR_RESPONSE_TO_CHEMICAL_STRESS	REACTOME_CELLULAR_RESPONSE_TO_CHEMICAL_STRESS		156	0.443132	1.43527	0.14557	0.437155	0.923	10858	tags=38%, list=20%, signal=48%
REACTOME_SIGNALING_BY_FGFR4	REACTOME_SIGNALING_BY_FGFR4		41	0.380431	1.30966	0.146214	0.447335	0.965	9309	tags=41%, list=17%, signal=50%
REACTOME_RND3_GTPASE_CYCLE	REACTOME_RND3_GTPASE_CYCLE		42	0.461156	1.3766	0.147436	0.433165	0.947	15769	tags=57%, list=29%, signal=81%
REACTOME_ACTIVATION_OF_THE_MRNA_UPON_BINDING_OF_THE_CAP_BINDING_COMPLEX_AND_EIFS_AND_SUBSEQUENT_BINDING_TO_43S	REACTOME_ACTIVATION_OF_THE_MRNA_UPON_BINDING_OF_THE_CAP_BINDING_COMPLEX_AND_EIFS_AND_SUBSEQUENT_BINDING_TO_43S		60	0.626487	1.47314	0.147541	0.448564	0.906	10891	tags=58%, list=20%, signal=73%
REACTOME_INFECTION_WITH_MYCOBACTERIUM_TUBERCULOSIS	REACTOME_INFECTION_WITH_MYCOBACTERIUM_TUBERCULOSIS		27	0.469531	1.37412	0.147727	0.43331	0.948	11544	tags=59%, list=21%, signal=75%
REACTOME_PROTEIN_PROTEIN_INTERACTIONS_AT_SYNAPSES	REACTOME_PROTEIN_PROTEIN_INTERACTIONS_AT_SYNAPSES		87	0.335369	1.28367	0.147826	0.444692	0.972	13693	tags=44%, list=25%, signal=58%
REACTOME_INTRINSIC_PATHWAY_FOR_APOPTOSIS	REACTOME_INTRINSIC_PATHWAY_FOR_APOPTOSIS		55	0.434133	1.36637	0.148069	0.433807	0.95	14594	tags=53%, list=27%, signal=72%
REACTOME_EUKARYOTIC_TRANSLATION_ELONGATION	REACTOME_EUKARYOTIC_TRANSLATION_ELONGATION		94	0.657207	1.53303	0.150495	0.508573	0.869	10891	tags=61%, list=20%, signal=76%
REACTOME_AUTOPHAGY	REACTOME_AUTOPHAGY		150	0.413514	1.42438	0.151261	0.441368	0.926	12846	tags=45%, list=24%, signal=59%
REACTOME_RECYCLING_OF_BILE_ACIDS_AND_SALTS	REACTOME_RECYCLING_OF_BILE_ACIDS_AND_SALTS		16	0.484574	1.34647	0.151589	0.445813	0.958	4384	tags=25%, list=8%, signal=27%
REACTOME_ANTIVIRAL_MECHANISM_BY_IFN_STIMULATED_GENES	REACTOME_ANTIVIRAL_MECHANISM_BY_IFN_STIMULATED_GENES		82	0.487846	1.43213	0.151639	0.434905	0.924	9043	tags=41%, list=17%, signal=50%
REACTOME_EGFR_DOWNREGULATION	REACTOME_EGFR_DOWNREGULATION		31	0.486846	1.40138	0.151807	0.441819	0.937	3583	tags=35%, list=7%, signal=38%
REACTOME_DEGRADATION_OF_BETA_CATENIN_BY_THE_DESTRUCTION_COMPLEX	REACTOME_DEGRADATION_OF_BETA_CATENIN_BY_THE_DESTRUCTION_COMPLEX		85	0.47814	1.42194	0.152918	0.440536	0.928	12856	tags=47%, list=24%, signal=62%
REACTOME_CELLULAR_RESPONSE_TO_STARVATION	REACTOME_CELLULAR_RESPONSE_TO_STARVATION		157	0.514687	1.47632	0.153846	0.455734	0.9	10891	tags=48%, list=20%, signal=61%
REACTOME_INACTIVATION_OF_CSF3_G_CSF_SIGNALING	REACTOME_INACTIVATION_OF_CSF3_G_CSF_SIGNALING		25	0.511287	1.37578	0.154018	0.432578	0.947	10670	tags=48%, list=20%, signal=60%
REACTOME_DISEASES_OF_SIGNAL_TRANSDUCTION_BY_GROWTH_FACTOR_RECEPTORS_AND_SECOND_MESSENGERS	REACTOME_DISEASES_OF_SIGNAL_TRANSDUCTION_BY_GROWTH_FACTOR_RECEPTORS_AND_SECOND_MESSENGERS		393	0.354831	1.34076	0.154195	0.44317	0.96	12129	tags=38%, list=23%, signal=49%
REACTOME_THE_NLRP3_INFLAMMASOME	REACTOME_THE_NLRP3_INFLAMMASOME		16	0.522709	1.35618	0.15625	0.441243	0.955	2003	tags=31%, list=4%, signal=32%
REACTOME_PHASE_I_FUNCTIONALIZATION_OF_COMPOUNDS	REACTOME_PHASE_I_FUNCTIONALIZATION_OF_COMPOUNDS		105	0.318267	1.28516	0.157407	0.447238	0.972	9460	tags=30%, list=18%, signal=36%
REACTOME_NEGATIVE_REGULATORS_OF_DDX58_IFIH1_SIGNALING	REACTOME_NEGATIVE_REGULATORS_OF_DDX58_IFIH1_SIGNALING		34	0.518013	1.41087	0.15859	0.433828	0.932	10973	tags=53%, list=20%, signal=66%
REACTOME_MAP2K_AND_MAPK_ACTIVATION	REACTOME_MAP2K_AND_MAPK_ACTIVATION		40	0.413479	1.3388	0.158621	0.44447	0.96	13738	tags=48%, list=26%, signal=64%
REACTOME_RAB_GERANYLGERANYLATION	REACTOME_RAB_GERANYLGERANYLATION		65	0.398672	1.32955	0.158879	0.443422	0.96	8151	tags=32%, list=15%, signal=38%
REACTOME_SIGNALING_BY_FGFR3	REACTOME_SIGNALING_BY_FGFR3		40	0.384958	1.28286	0.16	0.444378	0.972	9309	tags=40%, list=17%, signal=48%
REACTOME_PLASMA_LIPOPROTEIN_ASSEMBLY_REMODELING_AND_CLEARANCE	REACTOME_PLASMA_LIPOPROTEIN_ASSEMBLY_REMODELING_AND_CLEARANCE		71	0.391891	1.31844	0.160891	0.44521	0.963	10048	tags=32%, list=19%, signal=40%
REACTOME_DEUBIQUITINATION	REACTOME_DEUBIQUITINATION		281	0.393814	1.35894	0.161426	0.438396	0.955	15288	tags=46%, list=28%, signal=64%
REACTOME_REGULATION_OF_LIPID_METABOLISM_BY_PPARALPHA	REACTOME_REGULATION_OF_LIPID_METABOLISM_BY_PPARALPHA		119	0.397286	1.37045	0.161863	0.433083	0.949	10417	tags=37%, list=19%, signal=46%
REACTOME_DEACTIVATION_OF_THE_BETA_CATENIN_TRANSACTIVATING_COMPLEX	REACTOME_DEACTIVATION_OF_THE_BETA_CATENIN_TRANSACTIVATING_COMPLEX		42	0.442733	1.33863	0.162584	0.442902	0.96	9300	tags=38%, list=17%, signal=46%
REACTOME_INTERACTION_BETWEEN_L1_AND_ANKYRINS	REACTOME_INTERACTION_BETWEEN_L1_AND_ANKYRINS		31	0.386295	1.28816	0.165079	0.450375	0.969	6273	tags=32%, list=12%, signal=36%
REACTOME_SIGNALING_BY_NTRK3_TRKC	REACTOME_SIGNALING_BY_NTRK3_TRKC		17	0.457085	1.32359	0.166667	0.440488	0.961	12681	tags=53%, list=24%, signal=69%
REACTOME_SNRNP_ASSEMBLY	REACTOME_SNRNP_ASSEMBLY		54	0.564336	1.42098	0.166994	0.437164	0.928	11076	tags=50%, list=21%, signal=63%
REACTOME_TRNA_PROCESSING_IN_THE_NUCLEUS	REACTOME_TRNA_PROCESSING_IN_THE_NUCLEUS		58	0.549397	1.43332	0.168317	0.435386	0.923	10040	tags=43%, list=19%, signal=53%
REACTOME_SELENOAMINO_ACID_METABOLISM	REACTOME_SELENOAMINO_ACID_METABOLISM		118	0.570049	1.45958	0.168378	0.440262	0.914	10891	tags=53%, list=20%, signal=67%
REACTOME_TP53_REGULATES_TRANSCRIPTION_OF_CELL_CYCLE_GENES	REACTOME_TP53_REGULATES_TRANSCRIPTION_OF_CELL_CYCLE_GENES		49	0.451301	1.37828	0.170626	0.434537	0.946	13251	tags=45%, list=25%, signal=60%
REACTOME_PROTEIN_UBIQUITINATION	REACTOME_PROTEIN_UBIQUITINATION		79	0.452717	1.33574	0.171843	0.44433	0.96	10580	tags=37%, list=20%, signal=46%
REACTOME_PCP_CE_PATHWAY	REACTOME_PCP_CE_PATHWAY		92	0.433	1.37223	0.172632	0.432259	0.949	10438	tags=38%, list=19%, signal=47%
REACTOME_MITOCHONDRIAL_BIOGENESIS	REACTOME_MITOCHONDRIAL_BIOGENESIS		92	0.434065	1.36979	0.173038	0.432197	0.949	11163	tags=39%, list=21%, signal=49%
REACTOME_TRANSCRIPTIONAL_REGULATION_BY_TP53	REACTOME_TRANSCRIPTIONAL_REGULATION_BY_TP53		359	0.414685	1.39688	0.173116	0.440844	0.939	10461	tags=37%, list=19%, signal=45%
REACTOME_SMAD2_SMAD3_SMAD4_HETEROTRIMER_REGULATES_TRANSCRIPTION	REACTOME_SMAD2_SMAD3_SMAD4_HETEROTRIMER_REGULATES_TRANSCRIPTION		32	0.476868	1.3735	0.173362	0.432452	0.949	11612	tags=56%, list=22%, signal=72%
REACTOME_NRIF_SIGNALS_CELL_DEATH_FROM_THE_NUCLEUS	REACTOME_NRIF_SIGNALS_CELL_DEATH_FROM_THE_NUCLEUS		16	0.483296	1.32684	0.174009	0.438657	0.961	8043	tags=44%, list=15%, signal=51%
REACTOME_SIGNALING_BY_CSF3_G_CSF	REACTOME_SIGNALING_BY_CSF3_G_CSF		30	0.478592	1.32886	0.176471	0.442677	0.96	10670	tags=47%, list=20%, signal=58%
REACTOME_SEALING_OF_THE_NUCLEAR_ENVELOPE_NE_BY_ESCRT_III	REACTOME_SEALING_OF_THE_NUCLEAR_ENVELOPE_NE_BY_ESCRT_III		32	0.401481	1.26104	0.176471	0.454722	0.977	12812	tags=44%, list=24%, signal=57%
REACTOME_SIGNALING_BY_MET	REACTOME_SIGNALING_BY_MET		79	0.394214	1.31483	0.176744	0.447511	0.964	9810	tags=33%, list=18%, signal=40%
REACTOME_MITOCHONDRIAL_FATTY_ACID_BETA_OXIDATION	REACTOME_MITOCHONDRIAL_FATTY_ACID_BETA_OXIDATION		37	0.465902	1.35466	0.176871	0.441981	0.956	1515	tags=19%, list=3%, signal=19%
REACTOME_GAP_FILLING_DNA_REPAIR_SYNTHESIS_AND_LIGATION_IN_GG_NER	REACTOME_GAP_FILLING_DNA_REPAIR_SYNTHESIS_AND_LIGATION_IN_GG_NER		25	0.580039	1.39583	0.178645	0.440553	0.94	8327	tags=40%, list=15%, signal=47%
REACTOME_RESPONSE_OF_EIF2AK4_GCN2_TO_AMINO_ACID_DEFICIENCY	REACTOME_RESPONSE_OF_EIF2AK4_GCN2_TO_AMINO_ACID_DEFICIENCY		102	0.599847	1.46195	0.179074	0.438431	0.913	10891	tags=58%, list=20%, signal=72%
REACTOME_SIGNALING_BY_NOTCH1	REACTOME_SIGNALING_BY_NOTCH1		74	0.373811	1.30004	0.179372	0.450925	0.967	13223	tags=42%, list=25%, signal=55%
REACTOME_NOTCH1_INTRACELLULAR_DOMAIN_REGULATES_TRANSCRIPTION	REACTOME_NOTCH1_INTRACELLULAR_DOMAIN_REGULATES_TRANSCRIPTION		48	0.410252	1.32697	0.179431	0.440255	0.961	12488	tags=46%, list=23%, signal=60%
REACTOME_EXPORT_OF_VIRAL_RIBONUCLEOPROTEINS_FROM_NUCLEUS	REACTOME_EXPORT_OF_VIRAL_RIBONUCLEOPROTEINS_FROM_NUCLEUS		33	0.57792	1.42581	0.180769	0.441189	0.926	9300	tags=45%, list=17%, signal=55%
REACTOME_SIGNALING_BY_CTNNB1_PHOSPHO_SITE_MUTANTS	REACTOME_SIGNALING_BY_CTNNB1_PHOSPHO_SITE_MUTANTS		15	0.574865	1.37809	0.180851	0.432788	0.946	15566	tags=80%, list=29%, signal=113%
REACTOME_APOPTOTIC_EXECUTION_PHASE	REACTOME_APOPTOTIC_EXECUTION_PHASE		52	0.411629	1.30919	0.182033	0.446324	0.965	16653	tags=58%, list=31%, signal=83%
REACTOME_DEADENYLATION_OF_MRNA	REACTOME_DEADENYLATION_OF_MRNA		25	0.511306	1.36752	0.182186	0.433966	0.95	10888	tags=52%, list=20%, signal=65%
REACTOME_FORMATION_OF_ATP_BY_CHEMIOSMOTIC_COUPLING	REACTOME_FORMATION_OF_ATP_BY_CHEMIOSMOTIC_COUPLING		16	0.622553	1.36309	0.182377	0.435406	0.952	5629	tags=38%, list=10%, signal=42%
REACTOME_SPHINGOLIPID_DE_NOVO_BIOSYNTHESIS	REACTOME_SPHINGOLIPID_DE_NOVO_BIOSYNTHESIS		45	0.429101	1.29985	0.183445	0.449536	0.967	13371	tags=47%, list=25%, signal=62%
REACTOME_COPI_INDEPENDENT_GOLGI_TO_ER_RETROGRADE_TRAFFIC	REACTOME_COPI_INDEPENDENT_GOLGI_TO_ER_RETROGRADE_TRAFFIC		53	0.40328	1.27446	0.183486	0.444932	0.974	11312	tags=40%, list=21%, signal=50%
REACTOME_NOTCH2_ACTIVATION_AND_TRANSMISSION_OF_SIGNAL_TO_THE_NUCLEUS	REACTOME_NOTCH2_ACTIVATION_AND_TRANSMISSION_OF_SIGNAL_TO_THE_NUCLEUS		22	0.42321	1.26023	0.184729	0.451302	0.978	7233	tags=32%, list=13%, signal=37%
REACTOME_AMINO_ACID_TRANSPORT_ACROSS_THE_PLASMA_MEMBRANE	REACTOME_AMINO_ACID_TRANSPORT_ACROSS_THE_PLASMA_MEMBRANE		33	0.397474	1.25224	0.185714	0.456471	0.979	6783	tags=27%, list=13%, signal=31%
REACTOME_REGULATED_NECROSIS	REACTOME_REGULATED_NECROSIS		56	0.428492	1.30404	0.187354	0.451379	0.966	7170	tags=34%, list=13%, signal=39%
REACTOME_G_PROTEIN_MEDIATED_EVENTS	REACTOME_G_PROTEIN_MEDIATED_EVENTS		54	0.38186	1.2925	0.1875	0.451558	0.969	10805	tags=35%, list=20%, signal=44%
REACTOME_SEMA4D_IN_SEMAPHORIN_SIGNALING	REACTOME_SEMA4D_IN_SEMAPHORIN_SIGNALING		24	0.474135	1.30067	0.187919	0.451626	0.967	6147	tags=42%, list=11%, signal=47%
REACTOME_NEGATIVE_REGULATION_OF_FGFR2_SIGNALING	REACTOME_NEGATIVE_REGULATION_OF_FGFR2_SIGNALING		34	0.362118	1.23425	0.188525	0.44914	0.98	7407	tags=35%, list=14%, signal=41%
REACTOME_TRANSPORT_OF_THE_SLBP_DEPENDANT_MATURE_MRNA	REACTOME_TRANSPORT_OF_THE_SLBP_DEPENDANT_MATURE_MRNA		36	0.56707	1.42169	0.188571	0.43845	0.928	8493	tags=42%, list=16%, signal=49%
REACTOME_REGULATION_OF_MRNA_STABILITY_BY_PROTEINS_THAT_BIND_AU_RICH_ELEMENTS	REACTOME_REGULATION_OF_MRNA_STABILITY_BY_PROTEINS_THAT_BIND_AU_RICH_ELEMENTS		87	0.492383	1.3976	0.189243	0.444175	0.938	10930	tags=44%, list=20%, signal=55%
REACTOME_DIGESTION	REACTOME_DIGESTION		23	0.373737	1.26302	0.190184	0.454955	0.977	10974	tags=39%, list=20%, signal=49%
REACTOME_CASPASE_ACTIVATION_VIA_EXTRINSIC_APOPTOTIC_SIGNALLING_PATHWAY	REACTOME_CASPASE_ACTIVATION_VIA_EXTRINSIC_APOPTOTIC_SIGNALLING_PATHWAY		26	0.438211	1.29373	0.193317	0.452893	0.969	5430	tags=31%, list=10%, signal=34%
REACTOME_TGF_BETA_RECEPTOR_SIGNALING_ACTIVATES_SMADS	REACTOME_TGF_BETA_RECEPTOR_SIGNALING_ACTIVATES_SMADS		32	0.45083	1.29615	0.195789	0.452238	0.968	6329	tags=41%, list=12%, signal=46%
REACTOME_SIGNALING_BY_NUCLEAR_RECEPTORS	REACTOME_SIGNALING_BY_NUCLEAR_RECEPTORS		295	0.300621	1.23545	0.197619	0.452954	0.98	11938	tags=32%, list=22%, signal=41%
REACTOME_HIV_INFECTION	REACTOME_HIV_INFECTION		231	0.444533	1.39426	0.197628	0.438809	0.94	10850	tags=39%, list=20%, signal=49%
REACTOME_BIOLOGICAL_OXIDATIONS	REACTOME_BIOLOGICAL_OXIDATIONS		220	0.285849	1.20771	0.198738	0.456669	0.984	9852	tags=30%, list=18%, signal=37%
REACTOME_THE_ROLE_OF_GTSE1_IN_G2_M_PROGRESSION_AFTER_G2_CHECKPOINT	REACTOME_THE_ROLE_OF_GTSE1_IN_G2_M_PROGRESSION_AFTER_G2_CHECKPOINT		79	0.451917	1.33416	0.198745	0.443295	0.96	12856	tags=43%, list=24%, signal=56%
REACTOME_APOPTOTIC_CLEAVAGE_OF_CELLULAR_PROTEINS	REACTOME_APOPTOTIC_CLEAVAGE_OF_CELLULAR_PROTEINS		38	0.448965	1.32737	0.200924	0.443202	0.961	16653	tags=61%, list=31%, signal=88%
REACTOME_INTERACTIONS_OF_REV_WITH_HOST_CELLULAR_PROTEINS	REACTOME_INTERACTIONS_OF_REV_WITH_HOST_CELLULAR_PROTEINS		37	0.578498	1.38479	0.202703	0.431738	0.943	14347	tags=59%, list=27%, signal=81%
REACTOME_BETA_CATENIN_PHOSPHORYLATION_CASCADE	REACTOME_BETA_CATENIN_PHOSPHORYLATION_CASCADE		17	0.542233	1.33026	0.203024	0.444087	0.96	15566	tags=71%, list=29%, signal=99%
REACTOME_RAF_INDEPENDENT_MAPK1_3_ACTIVATION	REACTOME_RAF_INDEPENDENT_MAPK1_3_ACTIVATION		23	0.457947	1.28703	0.204176	0.447302	0.97	4413	tags=30%, list=8%, signal=33%
REACTOME_SIGNALING_BY_NTRKS	REACTOME_SIGNALING_BY_NTRKS		134	0.351128	1.2608	0.204225	0.45353	0.978	7407	tags=31%, list=14%, signal=36%
REACTOME_DEREGULATED_CDK5_TRIGGERS_MULTIPLE_NEURODEGENERATIVE_PATHWAYS_IN_ALZHEIMER_S_DISEASE_MODELS	REACTOME_DEREGULATED_CDK5_TRIGGERS_MULTIPLE_NEURODEGENERATIVE_PATHWAYS_IN_ALZHEIMER_S_DISEASE_MODELS		22	0.515618	1.32386	0.204545	0.441746	0.961	10336	tags=55%, list=19%, signal=67%
REACTOME_TP53_REGULATES_TRANSCRIPTION_OF_GENES_INVOLVED_IN_G2_CELL_CYCLE_ARREST	REACTOME_TP53_REGULATES_TRANSCRIPTION_OF_GENES_INVOLVED_IN_G2_CELL_CYCLE_ARREST		18	0.506104	1.29949	0.206009	0.448529	0.967	3612	tags=33%, list=7%, signal=36%
REACTOME_TRANSLESION_SYNTHESIS_BY_Y_FAMILY_DNA_POLYMERASES_BYPASSES_LESIONS_ON_DNA_TEMPLATE	REACTOME_TRANSLESION_SYNTHESIS_BY_Y_FAMILY_DNA_POLYMERASES_BYPASSES_LESIONS_ON_DNA_TEMPLATE		39	0.469167	1.31079	0.206186	0.446961	0.964	9043	tags=36%, list=17%, signal=43%
REACTOME_ANTIGEN_PROCESSING_UBIQUITINATION_PROTEASOME_DEGRADATION	REACTOME_ANTIGEN_PROCESSING_UBIQUITINATION_PROTEASOME_DEGRADATION		308	0.37362	1.30239	0.206967	0.45051	0.967	10427	tags=36%, list=19%, signal=44%
REACTOME_STING_MEDIATED_INDUCTION_OF_HOST_IMMUNE_RESPONSES	REACTOME_STING_MEDIATED_INDUCTION_OF_HOST_IMMUNE_RESPONSES		15	0.494791	1.28738	0.208426	0.448341	0.969	13461	tags=67%, list=25%, signal=89%
REACTOME_HEDGEHOG_LIGAND_BIOGENESIS	REACTOME_HEDGEHOG_LIGAND_BIOGENESIS		65	0.449532	1.31232	0.208925	0.449819	0.964	9358	tags=35%, list=17%, signal=43%
REACTOME_HIV_LIFE_CYCLE	REACTOME_HIV_LIFE_CYCLE		149	0.443719	1.34592	0.209393	0.444677	0.958	10850	tags=42%, list=20%, signal=52%
REACTOME_BRANCHED_CHAIN_AMINO_ACID_CATABOLISM	REACTOME_BRANCHED_CHAIN_AMINO_ACID_CATABOLISM		21	0.516878	1.29574	0.20985	0.451298	0.968	5892	tags=29%, list=11%, signal=32%
REACTOME_SIGNALING_BY_INTERLEUKINS	REACTOME_SIGNALING_BY_INTERLEUKINS		459	0.332048	1.24808	0.210526	0.456644	0.979	9519	tags=29%, list=18%, signal=35%
REACTOME_CHAPERONE_MEDIATED_AUTOPHAGY	REACTOME_CHAPERONE_MEDIATED_AUTOPHAGY		22	0.426281	1.2651	0.211207	0.455019	0.976	6329	tags=36%, list=12%, signal=41%
REACTOME_CELL_DEATH_SIGNALLING_VIA_NRAGE_NRIF_AND_NADE	REACTOME_CELL_DEATH_SIGNALLING_VIA_NRAGE_NRIF_AND_NADE		76	0.356367	1.23989	0.211268	0.453222	0.979	8375	tags=33%, list=16%, signal=39%
REACTOME_DISASSEMBLY_OF_THE_DESTRUCTION_COMPLEX_AND_RECRUITMENT_OF_AXIN_TO_THE_MEMBRANE	REACTOME_DISASSEMBLY_OF_THE_DESTRUCTION_COMPLEX_AND_RECRUITMENT_OF_AXIN_TO_THE_MEMBRANE		31	0.444458	1.28439	0.211712	0.44512	0.972	4945	tags=32%, list=9%, signal=36%
REACTOME_FORMATION_OF_TC_NER_PRE_INCISION_COMPLEX	REACTOME_FORMATION_OF_TC_NER_PRE_INCISION_COMPLEX		53	0.491622	1.33785	0.212302	0.442545	0.96	13241	tags=57%, list=25%, signal=75%
REACTOME_FORMATION_OF_RNA_POL_II_ELONGATION_COMPLEX	REACTOME_FORMATION_OF_RNA_POL_II_ELONGATION_COMPLEX		58	0.477177	1.34368	0.212476	0.440778	0.96	7028	tags=40%, list=13%, signal=46%
REACTOME_VXPX_CARGO_TARGETING_TO_CILIUM	REACTOME_VXPX_CARGO_TARGETING_TO_CILIUM		21	0.456727	1.28635	0.214592	0.44696	0.971	14866	tags=48%, list=28%, signal=66%
REACTOME_REGULATION_OF_RAS_BY_GAPS	REACTOME_REGULATION_OF_RAS_BY_GAPS		68	0.452891	1.31618	0.214876	0.447056	0.963	12992	tags=46%, list=24%, signal=60%
REACTOME_SPHINGOLIPID_METABOLISM	REACTOME_SPHINGOLIPID_METABOLISM		90	0.361682	1.22817	0.215247	0.451169	0.982	14212	tags=41%, list=26%, signal=56%
REACTOME_TOLL_LIKE_RECEPTOR_CASCADES	REACTOME_TOLL_LIKE_RECEPTOR_CASCADES		155	0.354677	1.26468	0.215385	0.454094	0.977	7584	tags=29%, list=14%, signal=34%
REACTOME_PROCESSING_OF_SMDT1	REACTOME_PROCESSING_OF_SMDT1		16	0.515313	1.28876	0.215768	0.451027	0.969	7831	tags=50%, list=15%, signal=58%
REACTOME_RAB_GEFS_EXCHANGE_GTP_FOR_GDP_ON_RABS	REACTOME_RAB_GEFS_EXCHANGE_GTP_FOR_GDP_ON_RABS		90	0.409425	1.29022	0.215812	0.45364	0.969	11290	tags=39%, list=21%, signal=49%
REACTOME_DEGRADATION_OF_DVL	REACTOME_DEGRADATION_OF_DVL		57	0.491976	1.32734	0.215886	0.441464	0.961	9358	tags=37%, list=17%, signal=45%
REACTOME_ASYMMETRIC_LOCALIZATION_OF_PCP_PROTEINS	REACTOME_ASYMMETRIC_LOCALIZATION_OF_PCP_PROTEINS		64	0.455793	1.29286	0.215933	0.452745	0.969	15288	tags=53%, list=28%, signal=74%
REACTOME_TRAFFICKING_OF_AMPA_RECEPTORS	REACTOME_TRAFFICKING_OF_AMPA_RECEPTORS		31	0.344582	1.20519	0.216	0.457705	0.984	12627	tags=39%, list=23%, signal=51%
REACTOME_PEROXISOMAL_PROTEIN_IMPORT	REACTOME_PEROXISOMAL_PROTEIN_IMPORT		63	0.429363	1.30269	0.216092	0.451705	0.967	9231	tags=37%, list=17%, signal=44%
REACTOME_TRANSFERRIN_ENDOCYTOSIS_AND_RECYCLING	REACTOME_TRANSFERRIN_ENDOCYTOSIS_AND_RECYCLING		31	0.401483	1.24153	0.217687	0.452342	0.979	13529	tags=48%, list=25%, signal=65%
REACTOME_SIGNALLING_TO_ERKS	REACTOME_SIGNALLING_TO_ERKS		34	0.428414	1.27792	0.219355	0.443955	0.973	4952	tags=32%, list=9%, signal=36%
REACTOME_SIGNALING_BY_TGF_BETA_RECEPTOR_COMPLEX	REACTOME_SIGNALING_BY_TGF_BETA_RECEPTOR_COMPLEX		73	0.416761	1.28249	0.220339	0.443429	0.972	10813	tags=45%, list=20%, signal=56%
REACTOME_INTERACTIONS_OF_VPR_WITH_HOST_CELLULAR_PROTEINS	REACTOME_INTERACTIONS_OF_VPR_WITH_HOST_CELLULAR_PROTEINS		37	0.539655	1.3642	0.222004	0.435546	0.95	8493	tags=41%, list=16%, signal=48%
REACTOME_WNT5A_DEPENDENT_INTERNALIZATION_OF_FZD4	REACTOME_WNT5A_DEPENDENT_INTERNALIZATION_OF_FZD4		15	0.483572	1.25144	0.224944	0.454705	0.979	11619	tags=53%, list=22%, signal=68%
REACTOME_REGULATION_OF_GLUCOKINASE_BY_GLUCOKINASE_REGULATORY_PROTEIN	REACTOME_REGULATION_OF_GLUCOKINASE_BY_GLUCOKINASE_REGULATORY_PROTEIN		32	0.531294	1.3446	0.225352	0.443037	0.959	8493	tags=38%, list=16%, signal=44%
REACTOME_INTERFERON_SIGNALING	REACTOME_INTERFERON_SIGNALING		201	0.364712	1.251	0.226636	0.453881	0.979	11168	tags=36%, list=21%, signal=46%
REACTOME_TRANSCRIPTION_COUPLED_NUCLEOTIDE_EXCISION_REPAIR_TC_NER	REACTOME_TRANSCRIPTION_COUPLED_NUCLEOTIDE_EXCISION_REPAIR_TC_NER		78	0.462848	1.31214	0.228963	0.448281	0.964	12229	tags=47%, list=23%, signal=61%
REACTOME_INITIATION_OF_NUCLEAR_ENVELOPE_NE_REFORMATION	REACTOME_INITIATION_OF_NUCLEAR_ENVELOPE_NE_REFORMATION		19	0.56278	1.30726	0.229249	0.447621	0.965	11544	tags=42%, list=21%, signal=54%
REACTOME_RRNA_PROCESSING	REACTOME_RRNA_PROCESSING		203	0.517729	1.35076	0.229675	0.444493	0.956	11951	tags=51%, list=22%, signal=65%
REACTOME_SRP_DEPENDENT_COTRANSLATIONAL_PROTEIN_TARGETING_TO_MEMBRANE	REACTOME_SRP_DEPENDENT_COTRANSLATIONAL_PROTEIN_TARGETING_TO_MEMBRANE		113	0.548109	1.38561	0.231076	0.439243	0.943	10891	tags=52%, list=20%, signal=65%
REACTOME_ION_CHANNEL_TRANSPORT	REACTOME_ION_CHANNEL_TRANSPORT		183	0.265172	1.14609	0.232295	0.472008	0.991	6790	tags=23%, list=13%, signal=26%
REACTOME_TRANSPORT_OF_MATURE_TRANSCRIPT_TO_CYTOPLASM	REACTOME_TRANSPORT_OF_MATURE_TRANSCRIPT_TO_CYTOPLASM		84	0.467918	1.33124	0.233333	0.444358	0.96	15003	tags=55%, list=28%, signal=76%
REACTOME_REGULATION_OF_RUNX3_EXPRESSION_AND_ACTIVITY	REACTOME_REGULATION_OF_RUNX3_EXPRESSION_AND_ACTIVITY		55	0.495064	1.31982	0.234086	0.444748	0.963	12856	tags=47%, list=24%, signal=62%
REACTOME_NUCLEAR_IMPORT_OF_REV_PROTEIN	REACTOME_NUCLEAR_IMPORT_OF_REV_PROTEIN		34	0.562701	1.35176	0.234951	0.444652	0.956	8493	tags=41%, list=16%, signal=49%
REACTOME_EPHA_MEDIATED_GROWTH_CONE_COLLAPSE	REACTOME_EPHA_MEDIATED_GROWTH_CONE_COLLAPSE		29	0.376109	1.18673	0.234987	0.461409	0.987	7407	tags=34%, list=14%, signal=40%
REACTOME_SIGNALING_BY_TGFB_FAMILY_MEMBERS	REACTOME_SIGNALING_BY_TGFB_FAMILY_MEMBERS		102	0.345639	1.22017	0.235165	0.453251	0.982	11999	tags=38%, list=22%, signal=49%
REACTOME_TERMINATION_OF_TRANSLESION_DNA_SYNTHESIS	REACTOME_TERMINATION_OF_TRANSLESION_DNA_SYNTHESIS		32	0.479111	1.28982	0.236402	0.452559	0.969	9043	tags=34%, list=17%, signal=41%
REACTOME_HEME_SIGNALING	REACTOME_HEME_SIGNALING		48	0.411062	1.23495	0.237668	0.449611	0.98	9904	tags=40%, list=18%, signal=48%
REACTOME_NUCLEOTIDE_SALVAGE	REACTOME_NUCLEOTIDE_SALVAGE		23	0.442631	1.2479	0.237986	0.455535	0.979	11191	tags=43%, list=21%, signal=55%
REACTOME_TRANSCRIPTIONAL_ACTIVITY_OF_SMAD2_SMAD3_SMAD4_HETEROTRIMER	REACTOME_TRANSCRIPTIONAL_ACTIVITY_OF_SMAD2_SMAD3_SMAD4_HETEROTRIMER		44	0.41586	1.25647	0.238289	0.452876	0.978	11934	tags=50%, list=22%, signal=64%
REACTOME_PURINERGIC_SIGNALING_IN_LEISHMANIASIS_INFECTION	REACTOME_PURINERGIC_SIGNALING_IN_LEISHMANIASIS_INFECTION		26	0.426741	1.24678	0.238579	0.453007	0.979	3496	tags=27%, list=6%, signal=29%
REACTOME_NEUROTRANSMITTER_RELEASE_CYCLE	REACTOME_NEUROTRANSMITTER_RELEASE_CYCLE		51	0.303482	1.14578	0.240385	0.471415	0.991	11725	tags=35%, list=22%, signal=45%
REACTOME_NUCLEAR_ENVELOPE_NE_REASSEMBLY	REACTOME_NUCLEAR_ENVELOPE_NE_REASSEMBLY		76	0.437045	1.28162	0.241803	0.443113	0.973	14347	tags=46%, list=27%, signal=63%
REACTOME_RHO_GTPASE_CYCLE	REACTOME_RHO_GTPASE_CYCLE		443	0.345202	1.23137	0.242009	0.45066	0.982	9398	tags=32%, list=17%, signal=39%
REACTOME_RAB_REGULATION_OF_TRAFFICKING	REACTOME_RAB_REGULATION_OF_TRAFFICKING		122	0.38855	1.25281	0.24359	0.457158	0.979	11290	tags=39%, list=21%, signal=49%
REACTOME_ACTIVATION_OF_AMPK_DOWNSTREAM_OF_NMDARS	REACTOME_ACTIVATION_OF_AMPK_DOWNSTREAM_OF_NMDARS		29	0.385011	1.19272	0.244094	0.459721	0.984	13136	tags=45%, list=24%, signal=59%
REACTOME_SIGNALING_BY_CYTOSOLIC_FGFR1_FUSION_MUTANTS	REACTOME_SIGNALING_BY_CYTOSOLIC_FGFR1_FUSION_MUTANTS		18	0.471605	1.24455	0.244211	0.454943	0.979	10076	tags=44%, list=19%, signal=55%
REACTOME_SIGNALING_BY_FGFR2	REACTOME_SIGNALING_BY_FGFR2		73	0.351559	1.22107	0.24537	0.453239	0.982	11473	tags=44%, list=21%, signal=56%
REACTOME_HEDGEHOG_OFF_STATE	REACTOME_HEDGEHOG_OFF_STATE		113	0.364705	1.23231	0.246725	0.450759	0.981	12488	tags=36%, list=23%, signal=47%
REACTOME_SYNTHESIS_OF_LEUKOTRIENES_LT_AND_EOXINS_EX	REACTOME_SYNTHESIS_OF_LEUKOTRIENES_LT_AND_EOXINS_EX		21	0.352883	1.17213	0.247191	0.473563	0.987	9433	tags=33%, list=18%, signal=40%
REACTOME_VEGFR2_MEDIATED_VASCULAR_PERMEABILITY	REACTOME_VEGFR2_MEDIATED_VASCULAR_PERMEABILITY		27	0.411089	1.21706	0.247596	0.454121	0.982	8357	tags=33%, list=16%, signal=39%
REACTOME_TRIGLYCERIDE_METABOLISM	REACTOME_TRIGLYCERIDE_METABOLISM		38	0.360962	1.18776	0.247863	0.462344	0.987	16420	tags=63%, list=31%, signal=91%
REACTOME_G1_S_DNA_DAMAGE_CHECKPOINTS	REACTOME_G1_S_DNA_DAMAGE_CHECKPOINTS		68	0.448987	1.27697	0.249485	0.443928	0.973	7397	tags=31%, list=14%, signal=36%
REACTOME_SCF_SKP2_MEDIATED_DEGRADATION_OF_P27_P21	REACTOME_SCF_SKP2_MEDIATED_DEGRADATION_OF_P27_P21		60	0.481547	1.28778	0.251012	0.449451	0.969	12856	tags=45%, list=24%, signal=59%
REACTOME_TRANSPORT_OF_MATURE_MRNAS_DERIVED_FROM_INTRONLESS_TRANSCRIPTS	REACTOME_TRANSPORT_OF_MATURE_MRNAS_DERIVED_FROM_INTRONLESS_TRANSCRIPTS		43	0.530017	1.34468	0.25239	0.444766	0.959	10068	tags=42%, list=19%, signal=51%
REACTOME_RHOG_GTPASE_CYCLE	REACTOME_RHOG_GTPASE_CYCLE		74	0.391779	1.24375	0.252677	0.454696	0.979	14221	tags=53%, list=26%, signal=72%
REACTOME_SIGNALING_BY_FLT3_ITD_AND_TKD_MUTANTS	REACTOME_SIGNALING_BY_FLT3_ITD_AND_TKD_MUTANTS		16	0.471034	1.24335	0.253968	0.453906	0.979	9381	tags=50%, list=17%, signal=61%
REACTOME_SIGNALING_BY_FGFR1	REACTOME_SIGNALING_BY_FGFR1		50	0.339387	1.16934	0.254593	0.472889	0.987	9309	tags=36%, list=17%, signal=43%
REACTOME_ACTIVATION_OF_GENE_EXPRESSION_BY_SREBF_SREBP	REACTOME_ACTIVATION_OF_GENE_EXPRESSION_BY_SREBF_SREBP		42	0.46638	1.25755	0.254989	0.454174	0.978	10990	tags=43%, list=20%, signal=54%
REACTOME_REGULATION_OF_PTEN_STABILITY_AND_ACTIVITY	REACTOME_REGULATION_OF_PTEN_STABILITY_AND_ACTIVITY		69	0.426808	1.24259	0.255446	0.453497	0.979	12891	tags=43%, list=24%, signal=57%
REACTOME_BETA_CATENIN_INDEPENDENT_WNT_SIGNALING	REACTOME_BETA_CATENIN_INDEPENDENT_WNT_SIGNALING		146	0.331951	1.21596	0.255656	0.453201	0.982	15567	tags=47%, list=29%, signal=65%
REACTOME_UB_SPECIFIC_PROCESSING_PROTEASES	REACTOME_UB_SPECIFIC_PROCESSING_PROTEASES		204	0.359166	1.22224	0.255814	0.454158	0.982	13956	tags=40%, list=26%, signal=54%
REACTOME_TCR_SIGNALING	REACTOME_TCR_SIGNALING		122	0.380781	1.22215	0.256236	0.452966	0.982	10298	tags=32%, list=19%, signal=39%
REACTOME_SULFUR_AMINO_ACID_METABOLISM	REACTOME_SULFUR_AMINO_ACID_METABOLISM		28	0.403037	1.20902	0.257611	0.456161	0.984	8628	tags=32%, list=16%, signal=38%
REACTOME_TBC_RABGAPS	REACTOME_TBC_RABGAPS		44	0.415378	1.21713	0.258278	0.455301	0.982	11290	tags=41%, list=21%, signal=52%
REACTOME_DISORDERS_OF_TRANSMEMBRANE_TRANSPORTERS	REACTOME_DISORDERS_OF_TRANSMEMBRANE_TRANSPORTERS		176	0.342382	1.23795	0.259861	0.453402	0.979	10310	tags=32%, list=19%, signal=39%
REACTOME_GLUCURONIDATION	REACTOME_GLUCURONIDATION		25	0.411547	1.2009	0.260388	0.45892	0.984	11597	tags=48%, list=22%, signal=61%
REACTOME_O_LINKED_GLYCOSYLATION_OF_MUCINS	REACTOME_O_LINKED_GLYCOSYLATION_OF_MUCINS		62	0.318485	1.15846	0.262195	0.469038	0.988	13112	tags=40%, list=24%, signal=53%
REACTOME_FORMATION_OF_TUBULIN_FOLDING_INTERMEDIATES_BY_CCT_TRIC	REACTOME_FORMATION_OF_TUBULIN_FOLDING_INTERMEDIATES_BY_CCT_TRIC		26	0.428979	1.23525	0.263033	0.451824	0.98	13944	tags=46%, list=26%, signal=62%
REACTOME_CYTOCHROME_P450_ARRANGED_BY_SUBSTRATE_TYPE	REACTOME_CYTOCHROME_P450_ARRANGED_BY_SUBSTRATE_TYPE		65	0.301959	1.16492	0.263158	0.47439	0.988	9460	tags=28%, list=18%, signal=34%
REACTOME_NEUTROPHIL_DEGRANULATION	REACTOME_NEUTROPHIL_DEGRANULATION		476	0.314422	1.16334	0.263682	0.473229	0.988	9390	tags=29%, list=17%, signal=35%
REACTOME_ASSEMBLY_OF_ACTIVE_LPL_AND_LIPC_LIPASE_COMPLEXES	REACTOME_ASSEMBLY_OF_ACTIVE_LPL_AND_LIPC_LIPASE_COMPLEXES		19	0.448189	1.22419	0.265583	0.454193	0.982	4057	tags=26%, list=8%, signal=28%
REACTOME_DNA_DAMAGE_BYPASS	REACTOME_DNA_DAMAGE_BYPASS		48	0.440283	1.23948	0.266129	0.452353	0.979	9043	tags=33%, list=17%, signal=40%
REACTOME_REGULATION_OF_CHOLESTEROL_BIOSYNTHESIS_BY_SREBP_SREBF	REACTOME_REGULATION_OF_CHOLESTEROL_BIOSYNTHESIS_BY_SREBP_SREBF		55	0.441949	1.23793	0.267666	0.45204	0.979	11544	tags=45%, list=21%, signal=58%
REACTOME_SHC1_EVENTS_IN_ERBB2_SIGNALING	REACTOME_SHC1_EVENTS_IN_ERBB2_SIGNALING		22	0.352773	1.14779	0.267717	0.472985	0.99	11005	tags=41%, list=20%, signal=51%
REACTOME_REGULATION_OF_FZD_BY_UBIQUITINATION	REACTOME_REGULATION_OF_FZD_BY_UBIQUITINATION		21	0.368633	1.15776	0.268817	0.468829	0.989	6936	tags=38%, list=13%, signal=44%
REACTOME_ONCOGENE_INDUCED_SENESCENCE	REACTOME_ONCOGENE_INDUCED_SENESCENCE		33	0.392423	1.18531	0.270213	0.462393	0.987	3583	tags=27%, list=7%, signal=29%
REACTOME_RHOD_GTPASE_CYCLE	REACTOME_RHOD_GTPASE_CYCLE		51	0.397304	1.20971	0.270563	0.456412	0.984	10721	tags=37%, list=20%, signal=46%
REACTOME_MRNA_SPLICING_MINOR_PATHWAY	REACTOME_MRNA_SPLICING_MINOR_PATHWAY		52	0.480928	1.26973	0.272904	0.449738	0.975	12111	tags=56%, list=22%, signal=72%
REACTOME_ORC1_REMOVAL_FROM_CHROMATIN	REACTOME_ORC1_REMOVAL_FROM_CHROMATIN		71	0.486364	1.28066	0.273642	0.441562	0.973	12856	tags=45%, list=24%, signal=59%
REACTOME_DEFECTIVE_CFTR_CAUSES_CYSTIC_FIBROSIS	REACTOME_DEFECTIVE_CFTR_CAUSES_CYSTIC_FIBROSIS		61	0.450812	1.24732	0.274162	0.455002	0.979	9358	tags=36%, list=17%, signal=44%
REACTOME_MRNA_SPLICING	REACTOME_MRNA_SPLICING		188	0.437855	1.24692	0.274809	0.454227	0.979	13919	tags=52%, list=26%, signal=69%
REACTOME_TNF_RECEPTOR_SUPERFAMILY_TNFSF_MEMBERS_MEDIATING_NON_CANONICAL_NF_KB_PATHWAY	REACTOME_TNF_RECEPTOR_SUPERFAMILY_TNFSF_MEMBERS_MEDIATING_NON_CANONICAL_NF_KB_PATHWAY		17	0.474204	1.213	0.275294	0.45528	0.982	5749	tags=29%, list=11%, signal=33%
REACTOME_TRANSMISSION_ACROSS_CHEMICAL_SYNAPSES	REACTOME_TRANSMISSION_ACROSS_CHEMICAL_SYNAPSES		269	0.249549	1.11496	0.27551	0.492326	0.993	11078	tags=27%, list=21%, signal=34%
REACTOME_RHOU_GTPASE_CYCLE	REACTOME_RHOU_GTPASE_CYCLE		34	0.451475	1.21266	0.275641	0.453305	0.982	8829	tags=38%, list=16%, signal=46%
REACTOME_SARS_COV_1_INFECTION	REACTOME_SARS_COV_1_INFECTION		50	0.387419	1.18933	0.276008	0.462431	0.984	7596	tags=32%, list=14%, signal=37%
REACTOME_PROTEIN_LOCALIZATION	REACTOME_PROTEIN_LOCALIZATION		163	0.396964	1.23763	0.276231	0.45105	0.979	9278	tags=33%, list=17%, signal=40%
REACTOME_SLC_TRANSPORTER_DISORDERS	REACTOME_SLC_TRANSPORTER_DISORDERS		99	0.321575	1.17223	0.276808	0.474594	0.987	8638	tags=28%, list=16%, signal=34%
REACTOME_CA_DEPENDENT_EVENTS	REACTOME_CA_DEPENDENT_EVENTS		37	0.365735	1.1611	0.276995	0.475413	0.988	10804	tags=35%, list=20%, signal=44%
REACTOME_PROCESSING_OF_CAPPED_INTRON_CONTAINING_PRE_MRNA	REACTOME_PROCESSING_OF_CAPPED_INTRON_CONTAINING_PRE_MRNA		242	0.431718	1.26134	0.27704	0.45574	0.977	14615	tags=52%, list=27%, signal=71%
REACTOME_SUMOYLATION_OF_DNA_REPLICATION_PROTEINS	REACTOME_SUMOYLATION_OF_DNA_REPLICATION_PROTEINS		46	0.495791	1.27253	0.27853	0.446522	0.974	8493	tags=33%, list=16%, signal=39%
REACTOME_RAC3_GTPASE_CYCLE	REACTOME_RAC3_GTPASE_CYCLE		94	0.356869	1.20086	0.279736	0.456473	0.984	13511	tags=45%, list=25%, signal=60%
REACTOME_CDC42_GTPASE_CYCLE	REACTOME_CDC42_GTPASE_CYCLE		158	0.325303	1.15956	0.280093	0.473104	0.988	9035	tags=32%, list=17%, signal=38%
REACTOME_SIGNALING_BY_FGFR	REACTOME_SIGNALING_BY_FGFR		87	0.332253	1.18323	0.280576	0.464207	0.987	9633	tags=37%, list=18%, signal=45%
REACTOME_SIGNALING_BY_NOTCH1_PEST_DOMAIN_MUTANTS_IN_CANCER	REACTOME_SIGNALING_BY_NOTCH1_PEST_DOMAIN_MUTANTS_IN_CANCER		58	0.359158	1.198	0.281046	0.45818	0.984	12766	tags=40%, list=24%, signal=52%
REACTOME_NEUROTRANSMITTER_RECEPTORS_AND_POSTSYNAPTIC_SIGNAL_TRANSMISSION	REACTOME_NEUROTRANSMITTER_RECEPTORS_AND_POSTSYNAPTIC_SIGNAL_TRANSMISSION		205	0.250777	1.11341	0.281646	0.491209	0.993	7407	tags=20%, list=14%, signal=23%
REACTOME_PKA_MEDIATED_PHOSPHORYLATION_OF_CREB	REACTOME_PKA_MEDIATED_PHOSPHORYLATION_OF_CREB		20	0.424396	1.19331	0.281755	0.460143	0.984	7405	tags=30%, list=14%, signal=35%
REACTOME_NEGATIVE_REGULATION_OF_FLT3	REACTOME_NEGATIVE_REGULATION_OF_FLT3		15	0.456178	1.18057	0.282511	0.467082	0.987	7560	tags=40%, list=14%, signal=47%
REACTOME_SIGNALING_BY_ERBB2_IN_CANCER	REACTOME_SIGNALING_BY_ERBB2_IN_CANCER		26	0.353913	1.15513	0.282776	0.47035	0.989	5069	tags=27%, list=9%, signal=30%
REACTOME_NUCLEAR_PORE_COMPLEX_NPC_DISASSEMBLY	REACTOME_NUCLEAR_PORE_COMPLEX_NPC_DISASSEMBLY		36	0.519683	1.28448	0.283757	0.446544	0.972	8493	tags=33%, list=16%, signal=40%
REACTOME_CYCLIN_A_CDK2_ASSOCIATED_EVENTS_AT_S_PHASE_ENTRY	REACTOME_CYCLIN_A_CDK2_ASSOCIATED_EVENTS_AT_S_PHASE_ENTRY		85	0.438198	1.25209	0.284569	0.455278	0.979	12856	tags=46%, list=24%, signal=60%
REACTOME_NUCLEOTIDE_EXCISION_REPAIR	REACTOME_NUCLEOTIDE_EXCISION_REPAIR		110	0.431689	1.2312	0.286837	0.449494	0.982	15269	tags=52%, list=28%, signal=72%
REACTOME_RECOGNITION_OF_DNA_DAMAGE_BY_PCNA_CONTAINING_REPLICATION_COMPLEX	REACTOME_RECOGNITION_OF_DNA_DAMAGE_BY_PCNA_CONTAINING_REPLICATION_COMPLEX		30	0.490252	1.21271	0.287449	0.454485	0.982	8327	tags=37%, list=15%, signal=43%
REACTOME_DUAL_INCISION_IN_TC_NER	REACTOME_DUAL_INCISION_IN_TC_NER		65	0.42377	1.19387	0.287968	0.46047	0.984	12229	tags=45%, list=23%, signal=58%
REACTOME_SUMOYLATION_OF_UBIQUITINYLATION_PROTEINS	REACTOME_SUMOYLATION_OF_UBIQUITINYLATION_PROTEINS		39	0.482038	1.26077	0.288499	0.452085	0.978	8493	tags=36%, list=16%, signal=43%
REACTOME_RHOH_GTPASE_CYCLE	REACTOME_RHOH_GTPASE_CYCLE		37	0.381039	1.17469	0.288503	0.473276	0.987	9247	tags=32%, list=17%, signal=39%
REACTOME_DISEASES_OF_IMMUNE_SYSTEM	REACTOME_DISEASES_OF_IMMUNE_SYSTEM		31	0.383627	1.16362	0.289604	0.474057	0.988	2003	tags=23%, list=4%, signal=23%
REACTOME_NS1_MEDIATED_EFFECTS_ON_HOST_PATHWAYS	REACTOME_NS1_MEDIATED_EFFECTS_ON_HOST_PATHWAYS		41	0.463866	1.22281	0.291585	0.454718	0.982	14347	tags=49%, list=27%, signal=66%
REACTOME_CARBOXYTERMINAL_POST_TRANSLATIONAL_MODIFICATIONS_OF_TUBULIN	REACTOME_CARBOXYTERMINAL_POST_TRANSLATIONAL_MODIFICATIONS_OF_TUBULIN		46	0.314795	1.11124	0.291667	0.485437	0.993	12812	tags=43%, list=24%, signal=57%
REACTOME_INTERFERON_GAMMA_SIGNALING	REACTOME_INTERFERON_GAMMA_SIGNALING		91	0.390306	1.18785	0.292383	0.463437	0.987	11047	tags=41%, list=21%, signal=51%
REACTOME_RHOBTB1_GTPASE_CYCLE	REACTOME_RHOBTB1_GTPASE_CYCLE		23	0.482681	1.22847	0.292969	0.452116	0.982	6147	tags=35%, list=11%, signal=39%
REACTOME_FGFR1_MUTANT_RECEPTOR_ACTIVATION	REACTOME_FGFR1_MUTANT_RECEPTOR_ACTIVATION		31	0.343283	1.13979	0.293827	0.475368	0.992	11473	tags=35%, list=21%, signal=45%
REACTOME_NEGATIVE_REGULATION_OF_NOTCH4_SIGNALING	REACTOME_NEGATIVE_REGULATION_OF_NOTCH4_SIGNALING		54	0.476152	1.2423	0.295409	0.452582	0.979	12856	tags=44%, list=24%, signal=58%
REACTOME_CYCLIN_D_ASSOCIATED_EVENTS_IN_G1	REACTOME_CYCLIN_D_ASSOCIATED_EVENTS_IN_G1		47	0.3989	1.19176	0.295964	0.459884	0.984	12488	tags=49%, list=23%, signal=64%
REACTOME_DEGRADATION_OF_AXIN	REACTOME_DEGRADATION_OF_AXIN		55	0.442664	1.20348	0.296748	0.458889	0.984	9358	tags=36%, list=17%, signal=44%
REACTOME_DARPP_32_EVENTS	REACTOME_DARPP_32_EVENTS		24	0.414025	1.17191	0.296943	0.471486	0.987	6711	tags=38%, list=12%, signal=43%
REACTOME_ARACHIDONIC_ACID_METABOLISM	REACTOME_ARACHIDONIC_ACID_METABOLISM		59	0.271538	1.09007	0.297203	0.491566	0.995	6422	tags=24%, list=12%, signal=27%
REACTOME_SWITCHING_OF_ORIGINS_TO_A_POST_REPLICATIVE_STATE	REACTOME_SWITCHING_OF_ORIGINS_TO_A_POST_REPLICATIVE_STATE		91	0.453858	1.21966	0.297352	0.452743	0.982	14836	tags=51%, list=28%, signal=70%
REACTOME_ASSOCIATION_OF_TRIC_CCT_WITH_TARGET_PROTEINS_DURING_BIOSYNTHESIS	REACTOME_ASSOCIATION_OF_TRIC_CCT_WITH_TARGET_PROTEINS_DURING_BIOSYNTHESIS		39	0.419439	1.22424	0.297468	0.455453	0.982	4895	tags=26%, list=9%, signal=28%
REACTOME_NEF_MEDIATES_DOWN_MODULATION_OF_CELL_SURFACE_RECEPTORS_BY_RECRUITING_THEM_TO_CLATHRIN_ADAPTERS	REACTOME_NEF_MEDIATES_DOWN_MODULATION_OF_CELL_SURFACE_RECEPTORS_BY_RECRUITING_THEM_TO_CLATHRIN_ADAPTERS		21	0.414515	1.15191	0.298319	0.471673	0.989	1906	tags=19%, list=4%, signal=20%
REACTOME_TRAFFICKING_OF_GLUR2_CONTAINING_AMPA_RECEPTORS	REACTOME_TRAFFICKING_OF_GLUR2_CONTAINING_AMPA_RECEPTORS		17	0.343962	1.12108	0.298765	0.487167	0.992	11500	tags=35%, list=21%, signal=45%
REACTOME_N_GLYCAN_TRIMMING_IN_THE_ER_AND_CALNEXIN_CALRETICULIN_CYCLE	REACTOME_N_GLYCAN_TRIMMING_IN_THE_ER_AND_CALNEXIN_CALRETICULIN_CYCLE		35	0.429582	1.17189	0.298969	0.470312	0.987	12587	tags=49%, list=23%, signal=63%
REACTOME_AMINO_ACIDS_REGULATE_MTORC1	REACTOME_AMINO_ACIDS_REGULATE_MTORC1		55	0.354992	1.11196	0.29932	0.489895	0.993	12493	tags=38%, list=23%, signal=50%
REACTOME_THE_CITRIC_ACID_TCA_CYCLE_AND_RESPIRATORY_ELECTRON_TRANSPORT	REACTOME_THE_CITRIC_ACID_TCA_CYCLE_AND_RESPIRATORY_ELECTRON_TRANSPORT		165	0.404128	1.2002	0.301031	0.456124	0.984	12455	tags=38%, list=23%, signal=50%
REACTOME_CLASS_I_MHC_MEDIATED_ANTIGEN_PROCESSING_PRESENTATION	REACTOME_CLASS_I_MHC_MEDIATED_ANTIGEN_PROCESSING_PRESENTATION		377	0.323819	1.16871	0.301486	0.471415	0.987	10427	tags=32%, list=19%, signal=39%
REACTOME_SUMOYLATION_OF_SUMOYLATION_PROTEINS	REACTOME_SUMOYLATION_OF_SUMOYLATION_PROTEINS		35	0.495396	1.23508	0.301556	0.450772	0.98	8493	tags=34%, list=16%, signal=41%
REACTOME_SEMAPHORIN_INTERACTIONS	REACTOME_SEMAPHORIN_INTERACTIONS		64	0.348287	1.16917	0.302663	0.47193	0.987	6386	tags=30%, list=12%, signal=34%
REACTOME_TRANSLATION	REACTOME_TRANSLATION		293	0.467268	1.25707	0.30303	0.45338	0.978	12114	tags=48%, list=23%, signal=61%
REACTOME_UCH_PROTEINASES	REACTOME_UCH_PROTEINASES		101	0.403958	1.19695	0.305499	0.458444	0.984	9358	tags=31%, list=17%, signal=37%
REACTOME_GLOBAL_GENOME_NUCLEOTIDE_EXCISION_REPAIR_GG_NER	REACTOME_GLOBAL_GENOME_NUCLEOTIDE_EXCISION_REPAIR_GG_NER		84	0.436358	1.2144	0.30572	0.454333	0.982	15269	tags=50%, list=28%, signal=70%
REACTOME_CITRIC_ACID_CYCLE_TCA_CYCLE	REACTOME_CITRIC_ACID_CYCLE_TCA_CYCLE		22	0.505103	1.2072	0.305955	0.456109	0.984	2693	tags=27%, list=5%, signal=29%
REACTOME_INSERTION_OF_TAIL_ANCHORED_PROTEINS_INTO_THE_ENDOPLASMIC_RETICULUM_MEMBRANE	REACTOME_INSERTION_OF_TAIL_ANCHORED_PROTEINS_INTO_THE_ENDOPLASMIC_RETICULUM_MEMBRANE		22	0.397087	1.1349	0.306723	0.480271	0.992	7087	tags=27%, list=13%, signal=31%
REACTOME_INTERLEUKIN_3_INTERLEUKIN_5_AND_GM_CSF_SIGNALING	REACTOME_INTERLEUKIN_3_INTERLEUKIN_5_AND_GM_CSF_SIGNALING		48	0.392748	1.15895	0.307522	0.469397	0.988	9381	tags=35%, list=17%, signal=43%
REACTOME_ER_TO_GOLGI_ANTEROGRADE_TRANSPORT	REACTOME_ER_TO_GOLGI_ANTEROGRADE_TRANSPORT		155	0.364441	1.20342	0.308017	0.457693	0.984	14322	tags=44%, list=27%, signal=60%
REACTOME_HS_GAG_BIOSYNTHESIS	REACTOME_HS_GAG_BIOSYNTHESIS		31	0.345754	1.13097	0.308271	0.482306	0.992	8090	tags=32%, list=15%, signal=38%
REACTOME_GLUTAMATE_NEUROTRANSMITTER_RELEASE_CYCLE	REACTOME_GLUTAMATE_NEUROTRANSMITTER_RELEASE_CYCLE		24	0.341435	1.11145	0.308642	0.486231	0.993	11725	tags=42%, list=22%, signal=53%
REACTOME_RHOQ_GTPASE_CYCLE	REACTOME_RHOQ_GTPASE_CYCLE		59	0.382767	1.18767	0.308725	0.461248	0.987	13776	tags=44%, list=26%, signal=59%
REACTOME_SIGNALING_BY_FGFR1_IN_DISEASE	REACTOME_SIGNALING_BY_FGFR1_IN_DISEASE		38	0.330276	1.14711	0.309353	0.472712	0.991	10076	tags=32%, list=19%, signal=39%
REACTOME_GROWTH_HORMONE_RECEPTOR_SIGNALING	REACTOME_GROWTH_HORMONE_RECEPTOR_SIGNALING		24	0.38584	1.16026	0.309524	0.47441	0.988	13140	tags=46%, list=24%, signal=61%
REACTOME_STABILIZATION_OF_P53	REACTOME_STABILIZATION_OF_P53		57	0.436976	1.19485	0.309859	0.460382	0.984	9358	tags=35%, list=17%, signal=42%
REACTOME_METABOLISM_OF_POLYAMINES	REACTOME_METABOLISM_OF_POLYAMINES		59	0.442901	1.2011	0.312245	0.45994	0.984	7397	tags=31%, list=14%, signal=35%
REACTOME_FATTY_ACID_METABOLISM	REACTOME_FATTY_ACID_METABOLISM		177	0.282884	1.10291	0.313673	0.486682	0.995	6680	tags=20%, list=12%, signal=23%
REACTOME_PURINE_CATABOLISM	REACTOME_PURINE_CATABOLISM		17	0.400543	1.12435	0.314554	0.485886	0.992	10338	tags=41%, list=19%, signal=51%
REACTOME_ABC_TRANSPORTER_DISORDERS	REACTOME_ABC_TRANSPORTER_DISORDERS		77	0.380731	1.17443	0.315678	0.472547	0.987	9358	tags=31%, list=17%, signal=38%
REACTOME_MITOTIC_G2_G2_M_PHASES	REACTOME_MITOTIC_G2_G2_M_PHASES		200	0.371733	1.17192	0.315789	0.472668	0.987	13106	tags=42%, list=24%, signal=55%
REACTOME_SIGNALING_BY_NOTCH2	REACTOME_SIGNALING_BY_NOTCH2		33	0.343992	1.1256	0.316832	0.487486	0.992	9848	tags=33%, list=18%, signal=41%
REACTOME_VIRAL_MESSENGER_RNA_SYNTHESIS	REACTOME_VIRAL_MESSENGER_RNA_SYNTHESIS		44	0.462372	1.21643	0.317025	0.453782	0.982	8493	tags=39%, list=16%, signal=46%
REACTOME_APC_C_CDC20_MEDIATED_DEGRADATION_OF_CYCLIN_B	REACTOME_APC_C_CDC20_MEDIATED_DEGRADATION_OF_CYCLIN_B		24	0.474514	1.16462	0.320641	0.473793	0.988	6863	tags=42%, list=13%, signal=48%
REACTOME_FRS_MEDIATED_FGFR1_SIGNALING	REACTOME_FRS_MEDIATED_FGFR1_SIGNALING		23	0.338574	1.10032	0.320988	0.48904	0.995	4716	tags=22%, list=9%, signal=24%
REACTOME_SARS_COV_2_INFECTION	REACTOME_SARS_COV_2_INFECTION		67	0.363922	1.13254	0.322176	0.481374	0.992	7596	tags=28%, list=14%, signal=33%
REACTOME_EXTRA_NUCLEAR_ESTROGEN_SIGNALING	REACTOME_EXTRA_NUCLEAR_ESTROGEN_SIGNALING		75	0.303478	1.11193	0.3225	0.488852	0.993	10523	tags=31%, list=20%, signal=38%
REACTOME_NRAGE_SIGNALS_DEATH_THROUGH_JNK	REACTOME_NRAGE_SIGNALS_DEATH_THROUGH_JNK		59	0.333612	1.11911	0.322816	0.487592	0.992	8375	tags=32%, list=16%, signal=38%
REACTOME_MICRORNA_MIRNA_BIOGENESIS	REACTOME_MICRORNA_MIRNA_BIOGENESIS		25	0.42577	1.15899	0.323651	0.471669	0.988	8033	tags=40%, list=15%, signal=47%
REACTOME_TRANSPORT_TO_THE_GOLGI_AND_SUBSEQUENT_MODIFICATION	REACTOME_TRANSPORT_TO_THE_GOLGI_AND_SUBSEQUENT_MODIFICATION		186	0.340013	1.15898	0.323974	0.470524	0.988	14322	tags=42%, list=27%, signal=58%
REACTOME_NA_CL_DEPENDENT_NEUROTRANSMITTER_TRANSPORTERS	REACTOME_NA_CL_DEPENDENT_NEUROTRANSMITTER_TRANSPORTERS		19	0.359765	1.10886	0.324074	0.485694	0.994	8235	tags=32%, list=15%, signal=37%
REACTOME_CYCLIN_A_B1_B2_ASSOCIATED_EVENTS_DURING_G2_M_TRANSITION	REACTOME_CYCLIN_A_B1_B2_ASSOCIATED_EVENTS_DURING_G2_M_TRANSITION		25	0.488803	1.20089	0.324649	0.45768	0.984	12138	tags=52%, list=23%, signal=67%
REACTOME_HIV_TRANSCRIPTION_ELONGATION	REACTOME_HIV_TRANSCRIPTION_ELONGATION		43	0.432061	1.16044	0.325301	0.475231	0.988	10850	tags=47%, list=20%, signal=58%
REACTOME_HIV_ELONGATION_ARREST_AND_RECOVERY	REACTOME_HIV_ELONGATION_ARREST_AND_RECOVERY		33	0.432765	1.15234	0.327198	0.472281	0.989	10813	tags=48%, list=20%, signal=61%
REACTOME_SIGNALING_BY_NOTCH4	REACTOME_SIGNALING_BY_NOTCH4		82	0.374199	1.16637	0.327345	0.473519	0.987	12856	tags=40%, list=24%, signal=53%
REACTOME_INTERLEUKIN_37_SIGNALING	REACTOME_INTERLEUKIN_37_SIGNALING		21	0.393992	1.1237	0.328704	0.485558	0.992	4026	tags=24%, list=7%, signal=26%
REACTOME_S_PHASE	REACTOME_S_PHASE		162	0.407372	1.14678	0.332669	0.472129	0.991	13215	tags=43%, list=25%, signal=57%
REACTOME_REGULATION_OF_PLK1_ACTIVITY_AT_G2_M_TRANSITION	REACTOME_REGULATION_OF_PLK1_ACTIVITY_AT_G2_M_TRANSITION		87	0.383522	1.15483	0.332673	0.469854	0.989	13106	tags=45%, list=24%, signal=59%
REACTOME_MITOTIC_G1_PHASE_AND_G1_S_TRANSITION	REACTOME_MITOTIC_G1_PHASE_AND_G1_S_TRANSITION		149	0.394409	1.14329	0.333333	0.473816	0.992	12488	tags=41%, list=23%, signal=53%
REACTOME_MRNA_DECAY_BY_5_TO_3_EXORIBONUCLEASE	REACTOME_MRNA_DECAY_BY_5_TO_3_EXORIBONUCLEASE		15	0.480219	1.1483	0.334677	0.474565	0.99	13028	tags=47%, list=24%, signal=62%
REACTOME_REGULATION_OF_RUNX1_EXPRESSION_AND_ACTIVITY	REACTOME_REGULATION_OF_RUNX1_EXPRESSION_AND_ACTIVITY		17	0.419702	1.12902	0.334895	0.483789	0.992	7551	tags=41%, list=14%, signal=48%
REACTOME_INSULIN_RECEPTOR_RECYCLING	REACTOME_INSULIN_RECEPTOR_RECYCLING		26	0.364046	1.08796	0.336427	0.493352	0.995	13529	tags=50%, list=25%, signal=67%
REACTOME_MITOCHONDRIAL_PROTEIN_IMPORT	REACTOME_MITOCHONDRIAL_PROTEIN_IMPORT		64	0.443557	1.17501	0.337374	0.474058	0.987	10542	tags=39%, list=20%, signal=49%
REACTOME_DEADENYLATION_DEPENDENT_MRNA_DECAY	REACTOME_DEADENYLATION_DEPENDENT_MRNA_DECAY		56	0.391753	1.14061	0.339286	0.475304	0.992	10930	tags=39%, list=20%, signal=49%
REACTOME_CRMPS_IN_SEMA3A_SIGNALING	REACTOME_CRMPS_IN_SEMA3A_SIGNALING		16	0.402886	1.10341	0.340633	0.486977	0.995	8423	tags=31%, list=16%, signal=37%
REACTOME_INFLAMMASOMES	REACTOME_INFLAMMASOMES		21	0.416983	1.11151	0.342043	0.48723	0.993	7341	tags=33%, list=14%, signal=39%
REACTOME_APC_C_CDH1_MEDIATED_DEGRADATION_OF_CDC20_AND_OTHER_APC_C_CDH1_TARGETED_PROTEINS_IN_LATE_MITOSIS_EARLY_G1	REACTOME_APC_C_CDH1_MEDIATED_DEGRADATION_OF_CDC20_AND_OTHER_APC_C_CDH1_TARGETED_PROTEINS_IN_LATE_MITOSIS_EARLY_G1		74	0.440164	1.15743	0.342799	0.468139	0.989	9358	tags=36%, list=17%, signal=44%
REACTOME_SIGNALING_BY_KIT_IN_DISEASE	REACTOME_SIGNALING_BY_KIT_IN_DISEASE		20	0.392887	1.13725	0.343681	0.478201	0.992	10670	tags=45%, list=20%, signal=56%
REACTOME_RNA_POLYMERASE_II_TRANSCRIPTION_TERMINATION	REACTOME_RNA_POLYMERASE_II_TRANSCRIPTION_TERMINATION		66	0.413071	1.15919	0.344828	0.472441	0.988	12362	tags=45%, list=23%, signal=59%
REACTOME_NEDDYLATION	REACTOME_NEDDYLATION		234	0.313131	1.09704	0.345382	0.490279	0.995	12617	tags=38%, list=23%, signal=49%
REACTOME_PYRUVATE_METABOLISM_AND_CITRIC_ACID_TCA_CYCLE	REACTOME_PYRUVATE_METABOLISM_AND_CITRIC_ACID_TCA_CYCLE		55	0.37703	1.12292	0.346405	0.485437	0.992	12268	tags=38%, list=23%, signal=49%
REACTOME_RHOA_GTPASE_CYCLE	REACTOME_RHOA_GTPASE_CYCLE		148	0.331016	1.11083	0.347032	0.484923	0.994	9362	tags=33%, list=17%, signal=40%
REACTOME_INTRACELLULAR_SIGNALING_BY_SECOND_MESSENGERS	REACTOME_INTRACELLULAR_SIGNALING_BY_SECOND_MESSENGERS		307	0.293911	1.13406	0.349315	0.480394	0.992	10805	tags=30%, list=20%, signal=37%
REACTOME_MTOR_SIGNALLING	REACTOME_MTOR_SIGNALLING		41	0.377925	1.11164	0.350305	0.488134	0.993	6755	tags=27%, list=13%, signal=31%
REACTOME_COPII_MEDIATED_VESICLE_TRANSPORT	REACTOME_COPII_MEDIATED_VESICLE_TRANSPORT		68	0.368044	1.11445	0.351579	0.491956	0.993	14085	tags=47%, list=26%, signal=64%
REACTOME_GOLGI_TO_ER_RETROGRADE_TRANSPORT	REACTOME_GOLGI_TO_ER_RETROGRADE_TRANSPORT		134	0.343723	1.11248	0.351648	0.490253	0.993	12174	tags=34%, list=23%, signal=44%
REACTOME_REGULATION_OF_RUNX2_EXPRESSION_AND_ACTIVITY	REACTOME_REGULATION_OF_RUNX2_EXPRESSION_AND_ACTIVITY		73	0.361089	1.10012	0.353556	0.488187	0.995	12856	tags=40%, list=24%, signal=52%
REACTOME_SYNTHESIS_OF_IP3_AND_IP4_IN_THE_CYTOSOL	REACTOME_SYNTHESIS_OF_IP3_AND_IP4_IN_THE_CYTOSOL		26	0.368096	1.10483	0.354762	0.488171	0.995	8643	tags=38%, list=16%, signal=46%
REACTOME_SEMA4D_INDUCED_CELL_MIGRATION_AND_GROWTH_CONE_COLLAPSE	REACTOME_SEMA4D_INDUCED_CELL_MIGRATION_AND_GROWTH_CONE_COLLAPSE		20	0.41408	1.10369	0.355814	0.487521	0.995	9886	tags=45%, list=18%, signal=55%
REACTOME_SLC_MEDIATED_TRANSMEMBRANE_TRANSPORT	REACTOME_SLC_MEDIATED_TRANSMEMBRANE_TRANSPORT		249	0.239611	1.04248	0.356037	0.523621	0.997	11894	tags=29%, list=22%, signal=37%
REACTOME_XENOBIOTICS	REACTOME_XENOBIOTICS		24	0.353423	1.09329	0.357924	0.490289	0.995	9460	tags=33%, list=18%, signal=40%
REACTOME_GAMMA_CARBOXYLATION_HYPUSINE_FORMATION_AND_ARYLSULFATASE_ACTIVATION	REACTOME_GAMMA_CARBOXYLATION_HYPUSINE_FORMATION_AND_ARYLSULFATASE_ACTIVATION		42	0.322875	1.04245	0.358314	0.522628	0.997	6079	tags=19%, list=11%, signal=21%
REACTOME_VISUAL_PHOTOTRANSDUCTION	REACTOME_VISUAL_PHOTOTRANSDUCTION		100	0.255765	1.05223	0.359736	0.518979	0.996	15511	tags=42%, list=29%, signal=59%
REACTOME_CHOLESTEROL_BIOSYNTHESIS	REACTOME_CHOLESTEROL_BIOSYNTHESIS		25	0.485284	1.15973	0.360619	0.474026	0.988	9746	tags=40%, list=18%, signal=49%
REACTOME_FRS_MEDIATED_FGFR3_SIGNALING	REACTOME_FRS_MEDIATED_FGFR3_SIGNALING		20	0.339646	1.08306	0.362745	0.494776	0.995	4716	tags=25%, list=9%, signal=27%
REACTOME_MHC_CLASS_II_ANTIGEN_PRESENTATION	REACTOME_MHC_CLASS_II_ANTIGEN_PRESENTATION		124	0.305634	1.09315	0.362768	0.489422	0.995	14273	tags=39%, list=27%, signal=53%
REACTOME_PTEN_REGULATION	REACTOME_PTEN_REGULATION		139	0.345329	1.10608	0.364729	0.487531	0.994	9358	tags=29%, list=17%, signal=35%
REACTOME_ASSEMBLY_OF_THE_PRE_REPLICATIVE_COMPLEX	REACTOME_ASSEMBLY_OF_THE_PRE_REPLICATIVE_COMPLEX		68	0.445122	1.14789	0.366197	0.473977	0.99	12856	tags=41%, list=24%, signal=54%
REACTOME_APC_C_MEDIATED_DEGRADATION_OF_CELL_CYCLE_PROTEINS	REACTOME_APC_C_MEDIATED_DEGRADATION_OF_CELL_CYCLE_PROTEINS		88	0.416487	1.11291	0.366733	0.490753	0.993	14015	tags=44%, list=26%, signal=60%
REACTOME_CRISTAE_FORMATION	REACTOME_CRISTAE_FORMATION		29	0.48562	1.14898	0.366803	0.474646	0.99	7461	tags=34%, list=14%, signal=40%
REACTOME_RAC1_GTPASE_CYCLE	REACTOME_RAC1_GTPASE_CYCLE		184	0.311254	1.09028	0.367713	0.492272	0.995	9398	tags=30%, list=17%, signal=37%
REACTOME_SIGNALING_BY_INSULIN_RECEPTOR	REACTOME_SIGNALING_BY_INSULIN_RECEPTOR		78	0.281401	1.06502	0.36828	0.512145	0.996	8159	tags=27%, list=15%, signal=32%
REACTOME_HEDGEHOG_ON_STATE	REACTOME_HEDGEHOG_ON_STATE		86	0.334645	1.0771	0.36933	0.498988	0.995	7910	tags=26%, list=15%, signal=30%
REACTOME_DUAL_INCISION_IN_GG_NER	REACTOME_DUAL_INCISION_IN_GG_NER		41	0.416489	1.10411	0.369697	0.487996	0.995	12012	tags=41%, list=22%, signal=53%
REACTOME_TRANSCRIPTIONAL_REGULATION_BY_RUNX3	REACTOME_TRANSCRIPTIONAL_REGULATION_BY_RUNX3		96	0.353561	1.11372	0.37013	0.491878	0.993	14615	tags=44%, list=27%, signal=60%
REACTOME_MRNA_CAPPING	REACTOME_MRNA_CAPPING		29	0.429154	1.09632	0.370221	0.490377	0.995	10850	tags=48%, list=20%, signal=60%
REACTOME_SIGNALING_BY_HEDGEHOG	REACTOME_SIGNALING_BY_HEDGEHOG		150	0.298633	1.06057	0.370787	0.515357	0.996	10614	tags=28%, list=20%, signal=35%
REACTOME_PHASE_II_CONJUGATION_OF_COMPOUNDS	REACTOME_PHASE_II_CONJUGATION_OF_COMPOUNDS		108	0.272995	1.04121	0.371015	0.523446	0.997	9852	tags=31%, list=18%, signal=38%
REACTOME_THE_ROLE_OF_NEF_IN_HIV_1_REPLICATION_AND_DISEASE_PATHOGENESIS	REACTOME_THE_ROLE_OF_NEF_IN_HIV_1_REPLICATION_AND_DISEASE_PATHOGENESIS		28	0.385124	1.0766	0.372807	0.498755	0.995	6386	tags=25%, list=12%, signal=28%
REACTOME_INTRA_GOLGI_AND_RETROGRADE_GOLGI_TO_ER_TRAFFIC	REACTOME_INTRA_GOLGI_AND_RETROGRADE_GOLGI_TO_ER_TRAFFIC		203	0.325918	1.07943	0.373391	0.498967	0.995	12322	tags=35%, list=23%, signal=45%
REACTOME_RESPIRATORY_ELECTRON_TRANSPORT_ATP_SYNTHESIS_BY_CHEMIOSMOTIC_COUPLING_AND_HEAT_PRODUCTION_BY_UNCOUPLING_PROTEINS	REACTOME_RESPIRATORY_ELECTRON_TRANSPORT_ATP_SYNTHESIS_BY_CHEMIOSMOTIC_COUPLING_AND_HEAT_PRODUCTION_BY_UNCOUPLING_PROTEINS		114	0.412203	1.11984	0.373469	0.487691	0.992	10603	tags=34%, list=20%, signal=43%
REACTOME_CHROMATIN_MODIFYING_ENZYMES	REACTOME_CHROMATIN_MODIFYING_ENZYMES		271	0.343948	1.12478	0.37422	0.486354	0.992	9288	tags=29%, list=17%, signal=35%
REACTOME_SIGNALING_BY_VEGF	REACTOME_SIGNALING_BY_VEGF		106	0.328199	1.10819	0.375576	0.485519	0.994	11788	tags=38%, list=22%, signal=48%
REACTOME_NETRIN_1_SIGNALING	REACTOME_NETRIN_1_SIGNALING		50	0.317525	1.04867	0.376263	0.51885	0.997	8043	tags=32%, list=15%, signal=38%
REACTOME_REGULATION_OF_BETA_CELL_DEVELOPMENT	REACTOME_REGULATION_OF_BETA_CELL_DEVELOPMENT		42	0.301191	1.05381	0.376731	0.517907	0.996	8602	tags=29%, list=16%, signal=34%
REACTOME_PI3K_AKT_SIGNALING_IN_CANCER	REACTOME_PI3K_AKT_SIGNALING_IN_CANCER		105	0.273092	1.04932	0.378151	0.521082	0.997	8357	tags=25%, list=16%, signal=29%
REACTOME_DAG_AND_IP3_SIGNALING	REACTOME_DAG_AND_IP3_SIGNALING		41	0.334257	1.06731	0.37963	0.510014	0.996	10805	tags=34%, list=20%, signal=43%
REACTOME_GLYOXYLATE_METABOLISM_AND_GLYCINE_DEGRADATION	REACTOME_GLYOXYLATE_METABOLISM_AND_GLYCINE_DEGRADATION		31	0.369633	1.08697	0.380047	0.49353	0.995	15423	tags=45%, list=29%, signal=63%
REACTOME_RESPIRATORY_ELECTRON_TRANSPORT	REACTOME_RESPIRATORY_ELECTRON_TRANSPORT		92	0.436144	1.14122	0.380567	0.475644	0.992	15413	tags=50%, list=29%, signal=70%
REACTOME_SIGNALING_BY_FLT3_FUSION_PROTEINS	REACTOME_SIGNALING_BY_FLT3_FUSION_PROTEINS		19	0.40679	1.09995	0.381466	0.487379	0.995	14322	tags=58%, list=27%, signal=79%
REACTOME_FGFR2_ALTERNATIVE_SPLICING	REACTOME_FGFR2_ALTERNATIVE_SPLICING		27	0.418509	1.08603	0.384314	0.493833	0.995	11143	tags=52%, list=21%, signal=65%
REACTOME_THE_PHOTOTRANSDUCTION_CASCADE	REACTOME_THE_PHOTOTRANSDUCTION_CASCADE		34	0.284286	1.03319	0.386243	0.525951	0.998	15392	tags=50%, list=29%, signal=70%
REACTOME_GLYCOSPHINGOLIPID_METABOLISM	REACTOME_GLYCOSPHINGOLIPID_METABOLISM		45	0.326701	1.05496	0.386861	0.519345	0.996	6535	tags=22%, list=12%, signal=25%
REACTOME_RHO_GTPASES_ACTIVATE_CIT	REACTOME_RHO_GTPASES_ACTIVATE_CIT		19	0.421318	1.09461	0.388521	0.490609	0.995	4015	tags=32%, list=7%, signal=34%
REACTOME_COPI_DEPENDENT_GOLGI_TO_ER_RETROGRADE_TRAFFIC	REACTOME_COPI_DEPENDENT_GOLGI_TO_ER_RETROGRADE_TRAFFIC		100	0.324131	1.05945	0.389868	0.515929	0.996	12174	tags=32%, list=23%, signal=41%
REACTOME_RETROGRADE_TRANSPORT_AT_THE_TRANS_GOLGI_NETWORK	REACTOME_RETROGRADE_TRANSPORT_AT_THE_TRANS_GOLGI_NETWORK		49	0.3789	1.07752	0.391039	0.500514	0.995	12622	tags=45%, list=23%, signal=59%
REACTOME_CELLULAR_HEXOSE_TRANSPORT	REACTOME_CELLULAR_HEXOSE_TRANSPORT		21	0.328166	1.05615	0.394366	0.518522	0.996	8127	tags=33%, list=15%, signal=39%
REACTOME_RECRUITMENT_OF_NUMA_TO_MITOTIC_CENTROSOMES	REACTOME_RECRUITMENT_OF_NUMA_TO_MITOTIC_CENTROSOMES		95	0.328269	1.03572	0.394958	0.52528	0.998	13106	tags=39%, list=24%, signal=51%
REACTOME_GRB2_EVENTS_IN_ERBB2_SIGNALING	REACTOME_GRB2_EVENTS_IN_ERBB2_SIGNALING		16	0.323843	1.02762	0.395137	0.52847	0.998	5069	tags=25%, list=9%, signal=28%
REACTOME_RHOJ_GTPASE_CYCLE	REACTOME_RHOJ_GTPASE_CYCLE		55	0.350525	1.07711	0.395349	0.500006	0.995	13511	tags=40%, list=25%, signal=53%
REACTOME_FLT3_SIGNALING	REACTOME_FLT3_SIGNALING		38	0.355976	1.05906	0.396018	0.515363	0.996	9381	tags=34%, list=17%, signal=41%
REACTOME_CONSTITUTIVE_SIGNALING_BY_EGFRVIII	REACTOME_CONSTITUTIVE_SIGNALING_BY_EGFRVIII		15	0.387377	1.06421	0.396752	0.512309	0.996	4716	tags=27%, list=9%, signal=29%
REACTOME_SIGNALING_BY_PDGF	REACTOME_SIGNALING_BY_PDGF		58	0.316062	1.03862	0.398058	0.524292	0.998	9381	tags=28%, list=17%, signal=33%
REACTOME_CTLA4_INHIBITORY_SIGNALING	REACTOME_CTLA4_INHIBITORY_SIGNALING		21	0.382584	1.05442	0.398664	0.518062	0.996	10046	tags=38%, list=19%, signal=47%
REACTOME_REGULATION_OF_TP53_ACTIVITY	REACTOME_REGULATION_OF_TP53_ACTIVITY		160	0.340925	1.08574	0.399185	0.492229	0.995	8964	tags=28%, list=17%, signal=34%
REACTOME_TRNA_PROCESSING	REACTOME_TRNA_PROCESSING		108	0.418071	1.11063	0.39959	0.484179	0.994	10040	tags=35%, list=19%, signal=43%
REACTOME_RRNA_MODIFICATION_IN_THE_NUCLEUS_AND_CYTOSOL	REACTOME_RRNA_MODIFICATION_IN_THE_NUCLEUS_AND_CYTOSOL		60	0.46098	1.12536	0.399594	0.486672	0.992	14791	tags=53%, list=27%, signal=73%
REACTOME_BETA_DEFENSINS	REACTOME_BETA_DEFENSINS		41	0.257065	1.01028	0.40274	0.536677	0.998	5992	tags=20%, list=11%, signal=22%
REACTOME_APC_CDC20_MEDIATED_DEGRADATION_OF_NEK2A	REACTOME_APC_CDC20_MEDIATED_DEGRADATION_OF_NEK2A		26	0.435308	1.06357	0.402806	0.512265	0.996	6863	tags=38%, list=13%, signal=44%
REACTOME_ESTROGEN_DEPENDENT_NUCLEAR_EVENTS_DOWNSTREAM_OF_ESR_MEMBRANE_SIGNALING	REACTOME_ESTROGEN_DEPENDENT_NUCLEAR_EVENTS_DOWNSTREAM_OF_ESR_MEMBRANE_SIGNALING		24	0.363856	1.04345	0.402948	0.523317	0.997	2358	tags=21%, list=4%, signal=22%
REACTOME_PROCESSING_OF_CAPPED_INTRONLESS_PRE_MRNA	REACTOME_PROCESSING_OF_CAPPED_INTRONLESS_PRE_MRNA		28	0.442969	1.09397	0.404215	0.490439	0.995	12335	tags=50%, list=23%, signal=65%
REACTOME_RAC2_GTPASE_CYCLE	REACTOME_RAC2_GTPASE_CYCLE		88	0.331249	1.049	0.404348	0.519452	0.997	14003	tags=47%, list=26%, signal=63%
REACTOME_SIGNALING_BY_WNT	REACTOME_SIGNALING_BY_WNT		328	0.262788	1.02692	0.408578	0.528459	0.998	12926	tags=33%, list=24%, signal=43%
REACTOME_METABOLISM_OF_COFACTORS	REACTOME_METABOLISM_OF_COFACTORS		19	0.415355	1.05043	0.409664	0.520656	0.997	12193	tags=42%, list=23%, signal=54%
REACTOME_SIGNALING_BY_FGFR_IN_DISEASE	REACTOME_SIGNALING_BY_FGFR_IN_DISEASE		63	0.288944	1.04549	0.409756	0.521376	0.997	10437	tags=33%, list=19%, signal=41%
REACTOME_SHC_MEDIATED_CASCADE_FGFR1	REACTOME_SHC_MEDIATED_CASCADE_FGFR1		21	0.319473	1.00493	0.410658	0.539203	0.998	4716	tags=19%, list=9%, signal=21%
REACTOME_EFFECTS_OF_PIP2_HYDROLYSIS	REACTOME_EFFECTS_OF_PIP2_HYDROLYSIS		27	0.333034	1.03537	0.413146	0.524709	0.998	14008	tags=48%, list=26%, signal=65%
REACTOME_SHC_MEDIATED_CASCADE_FGFR3	REACTOME_SHC_MEDIATED_CASCADE_FGFR3		18	0.320381	1.0088	0.41358	0.536689	0.998	4716	tags=22%, list=9%, signal=24%
REACTOME_DNA_REPLICATION	REACTOME_DNA_REPLICATION		128	0.409195	1.0947	0.414	0.491531	0.995	15288	tags=46%, list=28%, signal=64%
REACTOME_SIGNAL_REGULATORY_PROTEIN_FAMILY_INTERACTIONS	REACTOME_SIGNAL_REGULATORY_PROTEIN_FAMILY_INTERACTIONS		16	0.376248	1.03967	0.415525	0.523475	0.997	9999	tags=31%, list=19%, signal=38%
REACTOME_DNA_REPLICATION_PRE_INITIATION	REACTOME_DNA_REPLICATION_PRE_INITIATION		85	0.421698	1.08597	0.416	0.492873	0.995	15288	tags=46%, list=28%, signal=64%
REACTOME_TRISTETRAPROLIN_TTP_ZFP36_BINDS_AND_DESTABILIZES_MRNA	REACTOME_TRISTETRAPROLIN_TTP_ZFP36_BINDS_AND_DESTABILIZES_MRNA		17	0.439658	1.06789	0.41785	0.510327	0.996	11816	tags=53%, list=22%, signal=68%
REACTOME_IRS_MEDIATED_SIGNALLING	REACTOME_IRS_MEDIATED_SIGNALLING		48	0.286187	1.01959	0.41791	0.532726	0.998	8104	tags=27%, list=15%, signal=32%
REACTOME_CROSS_PRESENTATION_OF_SOLUBLE_EXOGENOUS_ANTIGENS_ENDOSOMES	REACTOME_CROSS_PRESENTATION_OF_SOLUBLE_EXOGENOUS_ANTIGENS_ENDOSOMES		50	0.387874	1.05459	0.418219	0.518841	0.996	12856	tags=38%, list=24%, signal=50%
REACTOME_SIGNALLING_TO_RAS	REACTOME_SIGNALLING_TO_RAS		20	0.363688	1.03736	0.418982	0.525044	0.998	1872	tags=25%, list=3%, signal=26%
REACTOME_NEURONAL_SYSTEM	REACTOME_NEURONAL_SYSTEM		409	0.223132	1.00151	0.420339	0.539296	0.998	11177	tags=27%, list=21%, signal=33%
REACTOME_ASPARAGINE_N_LINKED_GLYCOSYLATION	REACTOME_ASPARAGINE_N_LINKED_GLYCOSYLATION		305	0.291183	1.01203	0.420824	0.536247	0.998	13119	tags=36%, list=24%, signal=48%
REACTOME_TIE2_SIGNALING	REACTOME_TIE2_SIGNALING		18	0.337002	1.02495	0.422705	0.528235	0.998	9309	tags=33%, list=17%, signal=40%
REACTOME_TRANSCRIPTIONAL_REGULATION_BY_MECP2	REACTOME_TRANSCRIPTIONAL_REGULATION_BY_MECP2		62	0.280312	1.00758	0.422785	0.537345	0.998	15567	tags=44%, list=29%, signal=61%
REACTOME_SIGNALING_BY_NODAL	REACTOME_SIGNALING_BY_NODAL		19	0.324713	1.03164	0.423684	0.527092	0.998	5424	tags=21%, list=10%, signal=23%
REACTOME_GASTRIN_CREB_SIGNALLING_PATHWAY_VIA_PKC_AND_MAPK	REACTOME_GASTRIN_CREB_SIGNALLING_PATHWAY_VIA_PKC_AND_MAPK		18	0.356919	1.03508	0.424242	0.524113	0.998	7405	tags=28%, list=14%, signal=32%
REACTOME_RHO_GTPASES_ACTIVATE_ROCKS	REACTOME_RHO_GTPASES_ACTIVATE_ROCKS		19	0.403003	1.03974	0.42511	0.52438	0.997	12890	tags=58%, list=24%, signal=76%
REACTOME_ESR_MEDIATED_SIGNALING	REACTOME_ESR_MEDIATED_SIGNALING		219	0.269409	1.02972	0.426304	0.527671	0.998	11938	tags=31%, list=22%, signal=39%
REACTOME_METABOLISM_OF_STEROIDS	REACTOME_METABOLISM_OF_STEROIDS		151	0.258939	0.998955	0.426799	0.540855	0.998	14144	tags=36%, list=26%, signal=49%
REACTOME_TRANSCRIPTION_OF_THE_HIV_GENOME	REACTOME_TRANSCRIPTION_OF_THE_HIV_GENOME		70	0.357976	1.02561	0.428571	0.529286	0.998	10850	tags=39%, list=20%, signal=48%
REACTOME_REGULATION_OF_GENE_EXPRESSION_IN_LATE_STAGE_BRANCHING_MORPHOGENESIS_PANCREATIC_BUD_PRECURSOR_CELLS	REACTOME_REGULATION_OF_GENE_EXPRESSION_IN_LATE_STAGE_BRANCHING_MORPHOGENESIS_PANCREATIC_BUD_PRECURSOR_CELLS		16	0.369073	1.04653	0.429515	0.520909	0.997	11699	tags=44%, list=22%, signal=56%
REACTOME_SIGNALING_BY_ERBB2_ECD_MUTANTS	REACTOME_SIGNALING_BY_ERBB2_ECD_MUTANTS		16	0.354341	1.01579	0.430588	0.535014	0.998	4716	tags=25%, list=9%, signal=27%
REACTOME_FORMATION_OF_THE_EARLY_ELONGATION_COMPLEX	REACTOME_FORMATION_OF_THE_EARLY_ELONGATION_COMPLEX		33	0.396454	1.02776	0.432099	0.529303	0.998	8179	tags=36%, list=15%, signal=43%
REACTOME_SIGNAL_TRANSDUCTION_BY_L1	REACTOME_SIGNAL_TRANSDUCTION_BY_L1		21	0.350486	0.996495	0.435185	0.541922	0.998	5752	tags=24%, list=11%, signal=27%
REACTOME_COOPERATION_OF_PREFOLDIN_AND_TRIC_CCT_IN_ACTIN_AND_TUBULIN_FOLDING	REACTOME_COOPERATION_OF_PREFOLDIN_AND_TRIC_CCT_IN_ACTIN_AND_TUBULIN_FOLDING		33	0.350421	1.00622	0.436652	0.538212	0.998	14496	tags=45%, list=27%, signal=62%
REACTOME_ABC_FAMILY_PROTEINS_MEDIATED_TRANSPORT	REACTOME_ABC_FAMILY_PROTEINS_MEDIATED_TRANSPORT		103	0.297439	1.00096	0.437363	0.539075	0.998	9358	tags=28%, list=17%, signal=34%
REACTOME_SUMOYLATION	REACTOME_SUMOYLATION		187	0.29938	1.00278	0.439673	0.538452	0.998	14347	tags=39%, list=27%, signal=53%
REACTOME_ABORTIVE_ELONGATION_OF_HIV_1_TRANSCRIPT_IN_THE_ABSENCE_OF_TAT	REACTOME_ABORTIVE_ELONGATION_OF_HIV_1_TRANSCRIPT_IN_THE_ABSENCE_OF_TAT		23	0.401786	1.01979	0.441237	0.533444	0.998	7028	tags=35%, list=13%, signal=40%
REACTOME_SIGNALING_BY_SCF_KIT	REACTOME_SIGNALING_BY_SCF_KIT		43	0.32197	1.02006	0.441913	0.534083	0.998	9381	tags=33%, list=17%, signal=39%
REACTOME_NEGATIVE_REGULATION_OF_THE_PI3K_AKT_NETWORK	REACTOME_NEGATIVE_REGULATION_OF_THE_PI3K_AKT_NETWORK		113	0.257595	0.989412	0.441989	0.548197	0.998	8341	tags=25%, list=15%, signal=29%
REACTOME_TRANS_GOLGI_NETWORK_VESICLE_BUDDING	REACTOME_TRANS_GOLGI_NETWORK_VESICLE_BUDDING		72	0.350594	1.03644	0.442308	0.525234	0.998	11619	tags=36%, list=22%, signal=46%
REACTOME_DOWNREGULATION_OF_SMAD2_3_SMAD4_TRANSCRIPTIONAL_ACTIVITY	REACTOME_DOWNREGULATION_OF_SMAD2_3_SMAD4_TRANSCRIPTIONAL_ACTIVITY		23	0.361719	1.00968	0.443299	0.536478	0.998	11934	tags=48%, list=22%, signal=61%
REACTOME_RESOLUTION_OF_AP_SITES_VIA_THE_MULTIPLE_NUCLEOTIDE_PATCH_REPLACEMENT_PATHWAY	REACTOME_RESOLUTION_OF_AP_SITES_VIA_THE_MULTIPLE_NUCLEOTIDE_PATCH_REPLACEMENT_PATHWAY		25	0.448596	1.04927	0.444664	0.520105	0.997	11077	tags=36%, list=21%, signal=45%
REACTOME_HCMV_INFECTION	REACTOME_HCMV_INFECTION		159	0.310697	1.01103	0.446623	0.536625	0.998	13279	tags=36%, list=25%, signal=47%
REACTOME_ENERGY_DEPENDENT_REGULATION_OF_MTOR_BY_LKB1_AMPK	REACTOME_ENERGY_DEPENDENT_REGULATION_OF_MTOR_BY_LKB1_AMPK		29	0.350244	1.01254	0.447257	0.536368	0.998	6189	tags=24%, list=11%, signal=27%
REACTOME_CONSTITUTIVE_SIGNALING_BY_ABERRANT_PI3K_IN_CANCER	REACTOME_CONSTITUTIVE_SIGNALING_BY_ABERRANT_PI3K_IN_CANCER		78	0.271751	0.997851	0.45045	0.541221	0.998	8104	tags=26%, list=15%, signal=30%
REACTOME_PRE_NOTCH_PROCESSING_IN_GOLGI	REACTOME_PRE_NOTCH_PROCESSING_IN_GOLGI		18	0.367032	1.01577	0.451542	0.53406	0.998	9728	tags=33%, list=18%, signal=41%
REACTOME_SEPARATION_OF_SISTER_CHROMATIDS	REACTOME_SEPARATION_OF_SISTER_CHROMATIDS		191	0.348499	1.02515	0.451677	0.528939	0.998	13026	tags=37%, list=24%, signal=49%
REACTOME_POSTMITOTIC_NUCLEAR_PORE_COMPLEX_NPC_REFORMATION	REACTOME_POSTMITOTIC_NUCLEAR_PORE_COMPLEX_NPC_REFORMATION		27	0.451061	1.03154	0.453668	0.526198	0.998	14347	tags=48%, list=27%, signal=66%
REACTOME_CONSTITUTIVE_SIGNALING_BY_AKT1_E17K_IN_CANCER	REACTOME_CONSTITUTIVE_SIGNALING_BY_AKT1_E17K_IN_CANCER		26	0.366177	1.01475	0.458333	0.534594	0.998	14269	tags=38%, list=27%, signal=52%
REACTOME_EPHRIN_SIGNALING	REACTOME_EPHRIN_SIGNALING		19	0.347819	0.98696	0.458853	0.548822	0.998	10769	tags=37%, list=20%, signal=46%
REACTOME_FRS_MEDIATED_FGFR4_SIGNALING	REACTOME_FRS_MEDIATED_FGFR4_SIGNALING		22	0.300623	0.979934	0.461794	0.550952	0.998	4716	tags=23%, list=9%, signal=25%
REACTOME_G0_AND_EARLY_G1	REACTOME_G0_AND_EARLY_G1		27	0.371308	1.00442	0.462343	0.537966	0.998	12138	tags=44%, list=23%, signal=57%
REACTOME_NUCLEAR_ENVELOPE_BREAKDOWN	REACTOME_NUCLEAR_ENVELOPE_BREAKDOWN		53	0.370267	0.981824	0.462777	0.551152	0.998	8845	tags=26%, list=16%, signal=32%
REACTOME_REGULATION_OF_PYRUVATE_DEHYDROGENASE_PDH_COMPLEX	REACTOME_REGULATION_OF_PYRUVATE_DEHYDROGENASE_PDH_COMPLEX		16	0.386756	0.992217	0.462963	0.546161	0.998	10475	tags=44%, list=19%, signal=54%
REACTOME_PYRUVATE_METABOLISM	REACTOME_PYRUVATE_METABOLISM		31	0.323196	0.975899	0.463134	0.554787	0.999	14458	tags=45%, list=27%, signal=62%
REACTOME_INTERLEUKIN_20_FAMILY_SIGNALING	REACTOME_INTERLEUKIN_20_FAMILY_SIGNALING		26	0.36209	1.00321	0.46402	0.538757	0.998	11168	tags=38%, list=21%, signal=49%
REACTOME_GLYCEROPHOSPHOLIPID_BIOSYNTHESIS	REACTOME_GLYCEROPHOSPHOLIPID_BIOSYNTHESIS		128	0.267313	0.968038	0.46438	0.556865	0.999	13362	tags=38%, list=25%, signal=50%
REACTOME_SIGNALING_BY_TYPE_1_INSULIN_LIKE_GROWTH_FACTOR_1_RECEPTOR_IGF1R	REACTOME_SIGNALING_BY_TYPE_1_INSULIN_LIKE_GROWTH_FACTOR_1_RECEPTOR_IGF1R		54	0.26842	0.983899	0.464497	0.550117	0.998	8104	tags=28%, list=15%, signal=33%
REACTOME_TNFS_BIND_THEIR_PHYSIOLOGICAL_RECEPTORS	REACTOME_TNFS_BIND_THEIR_PHYSIOLOGICAL_RECEPTORS		28	0.348567	0.973244	0.465	0.555305	0.999	3970	tags=21%, list=7%, signal=23%
REACTOME_TELOMERE_EXTENSION_BY_TELOMERASE	REACTOME_TELOMERE_EXTENSION_BY_TELOMERASE		23	0.403504	1.01666	0.465553	0.534754	0.998	6393	tags=35%, list=12%, signal=39%
REACTOME_SARS_COV_INFECTIONS	REACTOME_SARS_COV_INFECTIONS		146	0.278915	0.964824	0.466951	0.559591	0.999	6599	tags=21%, list=12%, signal=24%
REACTOME_MITOTIC_METAPHASE_AND_ANAPHASE	REACTOME_MITOTIC_METAPHASE_AND_ANAPHASE		236	0.344728	1.00455	0.469428	0.538816	0.998	13026	tags=36%, list=24%, signal=48%
REACTOME_TRANSLATION_OF_SARS_COV_1_STRUCTURAL_PROTEINS	REACTOME_TRANSLATION_OF_SARS_COV_1_STRUCTURAL_PROTEINS		28	0.336126	0.980128	0.472527	0.55164	0.998	7596	tags=29%, list=14%, signal=33%
REACTOME_SYNTHESIS_OF_PIPS_AT_THE_PLASMA_MEMBRANE	REACTOME_SYNTHESIS_OF_PIPS_AT_THE_PLASMA_MEMBRANE		53	0.328213	0.996087	0.473002	0.541546	0.998	9309	tags=30%, list=17%, signal=36%
REACTOME_REGULATION_OF_GENE_EXPRESSION_IN_BETA_CELLS	REACTOME_REGULATION_OF_GENE_EXPRESSION_IN_BETA_CELLS		21	0.331842	0.991038	0.474684	0.546874	0.998	7216	tags=29%, list=13%, signal=33%
REACTOME_POST_CHAPERONIN_TUBULIN_FOLDING_PATHWAY	REACTOME_POST_CHAPERONIN_TUBULIN_FOLDING_PATHWAY		22	0.335085	0.988227	0.477041	0.547964	0.998	14137	tags=41%, list=26%, signal=55%
REACTOME_MISCELLANEOUS_TRANSPORT_AND_BINDING_EVENTS	REACTOME_MISCELLANEOUS_TRANSPORT_AND_BINDING_EVENTS		26	0.324598	0.982686	0.477477	0.550906	0.998	5886	tags=23%, list=11%, signal=26%
REACTOME_RHO_GTPASE_EFFECTORS	REACTOME_RHO_GTPASE_EFFECTORS		322	0.269405	0.957633	0.478355	0.565047	0.999	13026	tags=34%, list=24%, signal=44%
REACTOME_LYSOSOME_VESICLE_BIOGENESIS	REACTOME_LYSOSOME_VESICLE_BIOGENESIS		35	0.316744	0.971441	0.480687	0.555978	0.999	13223	tags=40%, list=25%, signal=53%
REACTOME_EXTENSION_OF_TELOMERES	REACTOME_EXTENSION_OF_TELOMERES		51	0.36934	0.979192	0.483101	0.551039	0.998	12309	tags=39%, list=23%, signal=51%
REACTOME_TCF_DEPENDENT_SIGNALING_IN_RESPONSE_TO_WNT	REACTOME_TCF_DEPENDENT_SIGNALING_IN_RESPONSE_TO_WNT		231	0.260118	0.952086	0.483589	0.566103	0.999	10726	tags=28%, list=20%, signal=34%
REACTOME_PCNA_DEPENDENT_LONG_PATCH_BASE_EXCISION_REPAIR	REACTOME_PCNA_DEPENDENT_LONG_PATCH_BASE_EXCISION_REPAIR		21	0.444016	1.01949	0.486111	0.531853	0.998	11077	tags=38%, list=21%, signal=48%
REACTOME_TRANSLATION_OF_SARS_COV_2_STRUCTURAL_PROTEINS	REACTOME_TRANSLATION_OF_SARS_COV_2_STRUCTURAL_PROTEINS		44	0.316492	0.954588	0.4862	0.567226	0.999	7596	tags=25%, list=14%, signal=29%
REACTOME_PKA_ACTIVATION_IN_GLUCAGON_SIGNALLING	REACTOME_PKA_ACTIVATION_IN_GLUCAGON_SIGNALLING		17	0.345577	0.966831	0.486301	0.557522	0.999	6711	tags=24%, list=12%, signal=27%
REACTOME_SUMOYLATION_OF_RNA_BINDING_PROTEINS	REACTOME_SUMOYLATION_OF_RNA_BINDING_PROTEINS		47	0.366268	0.986492	0.488636	0.548443	0.998	8493	tags=28%, list=16%, signal=33%
REACTOME_ANTIGEN_PROCESSING_CROSS_PRESENTATION	REACTOME_ANTIGEN_PROCESSING_CROSS_PRESENTATION		106	0.291238	0.952521	0.490909	0.56641	0.999	7397	tags=23%, list=14%, signal=26%
REACTOME_OPIOID_SIGNALLING	REACTOME_OPIOID_SIGNALLING		90	0.257925	0.959193	0.495261	0.563684	0.999	10805	tags=29%, list=20%, signal=36%
REACTOME_ACYL_CHAIN_REMODELLING_OF_PI	REACTOME_ACYL_CHAIN_REMODELLING_OF_PI		17	0.305384	0.970243	0.495652	0.555816	0.999	3922	tags=24%, list=7%, signal=25%
REACTOME_FORMATION_OF_SENESCENCE_ASSOCIATED_HETEROCHROMATIN_FOCI_SAHF	REACTOME_FORMATION_OF_SENESCENCE_ASSOCIATED_HETEROCHROMATIN_FOCI_SAHF		17	0.366139	0.95022	0.497826	0.565839	0.999	9527	tags=41%, list=18%, signal=50%
REACTOME_FACTORS_INVOLVED_IN_MEGAKARYOCYTE_DEVELOPMENT_AND_PLATELET_PRODUCTION	REACTOME_FACTORS_INVOLVED_IN_MEGAKARYOCYTE_DEVELOPMENT_AND_PLATELET_PRODUCTION		168	0.245896	0.972463	0.498807	0.555489	0.999	12398	tags=32%, list=23%, signal=41%
REACTOME_BUTYRATE_RESPONSE_FACTOR_1_BRF1_BINDS_AND_DESTABILIZES_MRNA	REACTOME_BUTYRATE_RESPONSE_FACTOR_1_BRF1_BINDS_AND_DESTABILIZES_MRNA		17	0.408448	0.985828	0.498952	0.548457	0.998	11816	tags=47%, list=22%, signal=60%
REACTOME_GOLGI_ASSOCIATED_VESICLE_BIOGENESIS	REACTOME_GOLGI_ASSOCIATED_VESICLE_BIOGENESIS		56	0.341773	0.981783	0.501048	0.550226	0.998	14322	tags=43%, list=27%, signal=58%
REACTOME_TRANSCRIPTIONAL_REGULATION_BY_VENTX	REACTOME_TRANSCRIPTIONAL_REGULATION_BY_VENTX		39	0.319853	0.960801	0.502101	0.563385	0.999	9231	tags=33%, list=17%, signal=40%
REACTOME_TP53_REGULATES_TRANSCRIPTION_OF_DNA_REPAIR_GENES	REACTOME_TP53_REGULATES_TRANSCRIPTION_OF_DNA_REPAIR_GENES		62	0.335397	0.954311	0.502935	0.566714	0.999	10850	tags=37%, list=20%, signal=46%
REACTOME_RESOLUTION_OF_ABASIC_SITES_AP_SITES	REACTOME_RESOLUTION_OF_ABASIC_SITES_AP_SITES		38	0.372001	0.950692	0.503055	0.566172	0.999	11077	tags=32%, list=21%, signal=40%
REACTOME_M_PHASE	REACTOME_M_PHASE		415	0.298362	0.945574	0.503953	0.570617	0.999	13106	tags=34%, list=24%, signal=45%
REACTOME_MTORC1_MEDIATED_SIGNALLING	REACTOME_MTORC1_MEDIATED_SIGNALLING		24	0.357296	0.946214	0.504167	0.570565	0.999	9326	tags=29%, list=17%, signal=35%
REACTOME_TRANSCRIPTION_OF_E2F_TARGETS_UNDER_NEGATIVE_CONTROL_BY_DREAM_COMPLEX	REACTOME_TRANSCRIPTION_OF_E2F_TARGETS_UNDER_NEGATIVE_CONTROL_BY_DREAM_COMPLEX		19	0.393137	0.989344	0.506383	0.5473	0.998	10794	tags=53%, list=20%, signal=66%
REACTOME_SUMOYLATION_OF_INTRACELLULAR_RECEPTORS	REACTOME_SUMOYLATION_OF_INTRACELLULAR_RECEPTORS		30	0.299709	0.974342	0.506562	0.555953	0.999	13257	tags=40%, list=25%, signal=53%
REACTOME_RHOC_GTPASE_CYCLE	REACTOME_RHOC_GTPASE_CYCLE		74	0.315948	0.969335	0.506757	0.556126	0.999	12486	tags=39%, list=23%, signal=51%
REACTOME_CONVERSION_FROM_APC_C_CDC20_TO_APC_C_CDH1_IN_LATE_ANAPHASE	REACTOME_CONVERSION_FROM_APC_C_CDC20_TO_APC_C_CDH1_IN_LATE_ANAPHASE		20	0.389281	0.97087	0.507812	0.555891	0.999	9231	tags=40%, list=17%, signal=48%
REACTOME_TRANSCRIPTIONAL_REGULATION_BY_RUNX1	REACTOME_TRANSCRIPTIONAL_REGULATION_BY_RUNX1		237	0.255958	0.952663	0.508889	0.567161	0.999	10580	tags=27%, list=20%, signal=33%
REACTOME_SIGNALING_BY_WNT_IN_CANCER	REACTOME_SIGNALING_BY_WNT_IN_CANCER		33	0.321115	0.962088	0.510112	0.562661	0.999	14800	tags=52%, list=27%, signal=71%
REACTOME_CYTOSOLIC_TRNA_AMINOACYLATION	REACTOME_CYTOSOLIC_TRNA_AMINOACYLATION		24	0.43497	0.973367	0.510121	0.556126	0.999	9910	tags=42%, list=18%, signal=51%
REACTOME_RHO_GTPASES_ACTIVATE_FORMINS	REACTOME_RHO_GTPASES_ACTIVATE_FORMINS		140	0.31177	0.95294	0.510204	0.567703	0.999	13420	tags=35%, list=25%, signal=47%
REACTOME_PHOSPHOLIPID_METABOLISM	REACTOME_PHOSPHOLIPID_METABOLISM		211	0.259545	0.942221	0.512315	0.574369	0.999	9861	tags=27%, list=18%, signal=34%
REACTOME_APOPTOTIC_FACTOR_MEDIATED_RESPONSE	REACTOME_APOPTOTIC_FACTOR_MEDIATED_RESPONSE		20	0.344944	0.934226	0.513859	0.578092	0.999	14594	tags=45%, list=27%, signal=62%
REACTOME_GLUTATHIONE_CONJUGATION	REACTOME_GLUTATHIONE_CONJUGATION		35	0.285682	0.941245	0.516624	0.574945	0.999	9692	tags=31%, list=18%, signal=38%
REACTOME_ORGANELLE_BIOGENESIS_AND_MAINTENANCE	REACTOME_ORGANELLE_BIOGENESIS_AND_MAINTENANCE		294	0.268852	0.917901	0.517526	0.594547	1	13136	tags=32%, list=24%, signal=42%
REACTOME_PIWI_INTERACTING_RNA_PIRNA_BIOGENESIS	REACTOME_PIWI_INTERACTING_RNA_PIRNA_BIOGENESIS		29	0.279757	0.940548	0.521197	0.574865	0.999	7028	tags=28%, list=13%, signal=32%
REACTOME_AURKA_ACTIVATION_BY_TPX2	REACTOME_AURKA_ACTIVATION_BY_TPX2		72	0.313543	0.915017	0.521484	0.594816	1	13106	tags=39%, list=24%, signal=51%
REACTOME_PROCESSING_OF_INTRONLESS_PRE_MRNAS	REACTOME_PROCESSING_OF_INTRONLESS_PRE_MRNAS		19	0.415146	0.960311	0.522593	0.563087	0.999	12335	tags=47%, list=23%, signal=61%
REACTOME_PEROXISOMAL_LIPID_METABOLISM	REACTOME_PEROXISOMAL_LIPID_METABOLISM		29	0.334982	0.939823	0.528634	0.574878	0.999	9211	tags=28%, list=17%, signal=33%
REACTOME_SYNTHESIS_OF_BILE_ACIDS_AND_BILE_SALTS_VIA_7ALPHA_HYDROXYCHOLESTEROL	REACTOME_SYNTHESIS_OF_BILE_ACIDS_AND_BILE_SALTS_VIA_7ALPHA_HYDROXYCHOLESTEROL		24	0.300744	0.917	0.533157	0.59483	1	15615	tags=46%, list=29%, signal=65%
REACTOME_METABOLISM_OF_NUCLEOTIDES	REACTOME_METABOLISM_OF_NUCLEOTIDES		98	0.282729	0.935529	0.534831	0.578187	0.999	13431	tags=40%, list=25%, signal=53%
REACTOME_COMPLEX_I_BIOGENESIS	REACTOME_COMPLEX_I_BIOGENESIS		51	0.37611	0.936353	0.538622	0.578029	0.999	15305	tags=51%, list=28%, signal=71%
REACTOME_ESTROGEN_DEPENDENT_GENE_EXPRESSION	REACTOME_ESTROGEN_DEPENDENT_GENE_EXPRESSION		148	0.263521	0.900118	0.542735	0.60428	1	11938	tags=30%, list=22%, signal=39%
REACTOME_RNA_POLYMERASE_II_TRANSCRIBES_SNRNA_GENES	REACTOME_RNA_POLYMERASE_II_TRANSCRIBES_SNRNA_GENES		80	0.284598	0.892083	0.544204	0.608281	1	7028	tags=25%, list=13%, signal=29%
REACTOME_SYNTHESIS_OF_VERY_LONG_CHAIN_FATTY_ACYL_COAS	REACTOME_SYNTHESIS_OF_VERY_LONG_CHAIN_FATTY_ACYL_COAS		24	0.272142	0.929968	0.544335	0.583322	1	6680	tags=21%, list=12%, signal=24%
REACTOME_METALLOPROTEASE_DUBS	REACTOME_METALLOPROTEASE_DUBS		36	0.310824	0.906875	0.545254	0.59855	1	15084	tags=39%, list=28%, signal=54%
REACTOME_TRANSLESION_SYNTHESIS_BY_POLK	REACTOME_TRANSLESION_SYNTHESIS_BY_POLK		17	0.390907	0.93965	0.548319	0.574177	0.999	7211	tags=29%, list=13%, signal=34%
REACTOME_AQUAPORIN_MEDIATED_TRANSPORT	REACTOME_AQUAPORIN_MEDIATED_TRANSPORT		52	0.247918	0.951022	0.55	0.56667	0.999	10853	tags=29%, list=20%, signal=36%
REACTOME_SHC_MEDIATED_CASCADE_FGFR4	REACTOME_SHC_MEDIATED_CASCADE_FGFR4		20	0.279131	0.897518	0.550336	0.605864	1	4716	tags=20%, list=9%, signal=22%
REACTOME_MISMATCH_REPAIR	REACTOME_MISMATCH_REPAIR		15	0.414114	0.912496	0.551724	0.594463	1	18842	tags=67%, list=35%, signal=103%
REACTOME_HDMS_DEMETHYLATE_HISTONES	REACTOME_HDMS_DEMETHYLATE_HISTONES		48	0.312143	0.913989	0.551876	0.593423	1	3346	tags=19%, list=6%, signal=20%
REACTOME_SIGNALING_BY_FGFR2_IIIA_TM	REACTOME_SIGNALING_BY_FGFR2_IIIA_TM		19	0.334748	0.876086	0.551948	0.620332	1	7028	tags=32%, list=13%, signal=36%
REACTOME_FORMATION_OF_INCISION_COMPLEX_IN_GG_NER	REACTOME_FORMATION_OF_INCISION_COMPLEX_IN_GG_NER		43	0.341205	0.925582	0.553191	0.586453	1	14821	tags=44%, list=28%, signal=61%
REACTOME_INSULIN_RECEPTOR_SIGNALLING_CASCADE	REACTOME_INSULIN_RECEPTOR_SIGNALLING_CASCADE		54	0.256026	0.926585	0.553623	0.586075	1	8104	tags=26%, list=15%, signal=30%
REACTOME_RNA_POLYMERASE_I_TRANSCRIPTION_INITIATION	REACTOME_RNA_POLYMERASE_I_TRANSCRIPTION_INITIATION		47	0.328888	0.906639	0.55534	0.596935	1	12809	tags=40%, list=24%, signal=53%
REACTOME_PLASMA_LIPOPROTEIN_REMODELING	REACTOME_PLASMA_LIPOPROTEIN_REMODELING		32	0.298887	0.828679	0.555556	0.667348	1	6644	tags=19%, list=12%, signal=21%
REACTOME_MITOCHONDRIAL_TRNA_AMINOACYLATION	REACTOME_MITOCHONDRIAL_TRNA_AMINOACYLATION		21	0.440397	0.957102	0.55579	0.564714	0.999	8763	tags=33%, list=16%, signal=40%
REACTOME_ION_HOMEOSTASIS	REACTOME_ION_HOMEOSTASIS		54	0.270055	0.91668	0.55643	0.594468	1	7338	tags=28%, list=14%, signal=32%
REACTOME_CD28_CO_STIMULATION	REACTOME_CD28_CO_STIMULATION		33	0.299424	0.915909	0.558296	0.594643	1	9309	tags=30%, list=17%, signal=37%
REACTOME_DEFECTIVE_C1GALT1C1_CAUSES_TN_POLYAGGLUTINATION_SYNDROME_TNPS	REACTOME_DEFECTIVE_C1GALT1C1_CAUSES_TN_POLYAGGLUTINATION_SYNDROME_TNPS		17	0.33133	0.906751	0.558912	0.597744	1	12727	tags=47%, list=24%, signal=62%
REACTOME_SYNTHESIS_OF_BILE_ACIDS_AND_BILE_SALTS_VIA_27_HYDROXYCHOLESTEROL	REACTOME_SYNTHESIS_OF_BILE_ACIDS_AND_BILE_SALTS_VIA_27_HYDROXYCHOLESTEROL		15	0.331191	0.921551	0.559055	0.590452	1	14955	tags=47%, list=28%, signal=65%
REACTOME_ER_QUALITY_CONTROL_COMPARTMENT_ERQC	REACTOME_ER_QUALITY_CONTROL_COMPARTMENT_ERQC		21	0.34359	0.911472	0.560166	0.593876	1	8717	tags=33%, list=16%, signal=40%
REACTOME_DOWNSTREAM_SIGNALING_OF_ACTIVATED_FGFR1	REACTOME_DOWNSTREAM_SIGNALING_OF_ACTIVATED_FGFR1		31	0.259639	0.893974	0.561765	0.608383	1	6291	tags=19%, list=12%, signal=22%
REACTOME_TRANSCRIPTIONAL_REGULATION_BY_RUNX2	REACTOME_TRANSCRIPTIONAL_REGULATION_BY_RUNX2		120	0.256216	0.876653	0.563758	0.620432	1	7407	tags=21%, list=14%, signal=24%
REACTOME_ABERRANT_REGULATION_OF_MITOTIC_EXIT_IN_CANCER_DUE_TO_RB1_DEFECTS	REACTOME_ABERRANT_REGULATION_OF_MITOTIC_EXIT_IN_CANCER_DUE_TO_RB1_DEFECTS		20	0.378663	0.929846	0.563851	0.582538	1	9231	tags=40%, list=17%, signal=48%
REACTOME_TRNA_AMINOACYLATION	REACTOME_TRNA_AMINOACYLATION		42	0.403587	0.934748	0.568134	0.578305	0.999	9910	tags=36%, list=18%, signal=44%
REACTOME_O_LINKED_GLYCOSYLATION	REACTOME_O_LINKED_GLYCOSYLATION		111	0.234145	0.914105	0.568862	0.59419	1	13112	tags=34%, list=24%, signal=45%
REACTOME_BLOOD_GROUP_SYSTEMS_BIOSYNTHESIS	REACTOME_BLOOD_GROUP_SYSTEMS_BIOSYNTHESIS		21	0.283379	0.914302	0.571809	0.594876	1	4473	tags=24%, list=8%, signal=26%
REACTOME_MITOCHONDRIAL_TRANSLATION	REACTOME_MITOCHONDRIAL_TRANSLATION		94	0.344978	0.860908	0.574037	0.6356	1	12075	tags=41%, list=22%, signal=53%
REACTOME_TRANSCRIPTIONAL_REGULATION_BY_THE_AP_2_TFAP2_FAMILY_OF_TRANSCRIPTION_FACTORS	REACTOME_TRANSCRIPTIONAL_REGULATION_BY_THE_AP_2_TFAP2_FAMILY_OF_TRANSCRIPTION_FACTORS		38	0.258297	0.885535	0.574684	0.613985	1	12392	tags=32%, list=23%, signal=41%
REACTOME_RHO_GTPASES_ACTIVATE_NADPH_OXIDASES	REACTOME_RHO_GTPASES_ACTIVATE_NADPH_OXIDASES		24	0.302357	0.905221	0.575	0.597979	1	7976	tags=29%, list=15%, signal=34%
REACTOME_RHOB_GTPASE_CYCLE	REACTOME_RHOB_GTPASE_CYCLE		70	0.291806	0.908712	0.576744	0.596795	1	8375	tags=30%, list=16%, signal=35%
REACTOME_PI3K_EVENTS_IN_ERBB2_SIGNALING	REACTOME_PI3K_EVENTS_IN_ERBB2_SIGNALING		16	0.29954	0.911667	0.577031	0.594585	1	11005	tags=38%, list=20%, signal=47%
REACTOME_SIGNALING_BY_FGFR2_IN_DISEASE	REACTOME_SIGNALING_BY_FGFR2_IN_DISEASE		43	0.255431	0.893763	0.577428	0.607688	1	7028	tags=23%, list=13%, signal=27%
REACTOME_DOWNSTREAM_SIGNALING_OF_ACTIVATED_FGFR3	REACTOME_DOWNSTREAM_SIGNALING_OF_ACTIVATED_FGFR3		25	0.277041	0.924387	0.579882	0.587202	1	4716	tags=20%, list=9%, signal=22%
REACTOME_SIGNALING_BY_ERYTHROPOIETIN	REACTOME_SIGNALING_BY_ERYTHROPOIETIN		25	0.312838	0.894522	0.58	0.608536	1	4716	tags=24%, list=9%, signal=26%
REACTOME_PI_METABOLISM	REACTOME_PI_METABOLISM		84	0.270161	0.876997	0.582251	0.621923	1	9835	tags=27%, list=18%, signal=33%
REACTOME_SIGNALING_BY_NOTCH	REACTOME_SIGNALING_BY_NOTCH		245	0.232668	0.888529	0.582969	0.611617	1	12926	tags=29%, list=24%, signal=37%
REACTOME_INTERLEUKIN_10_SIGNALING	REACTOME_INTERLEUKIN_10_SIGNALING		45	0.324781	0.849736	0.583979	0.642372	1	4045	tags=18%, list=8%, signal=19%
REACTOME_RUNX1_INTERACTS_WITH_CO_FACTORS_WHOSE_PRECISE_EFFECT_ON_RUNX1_TARGETS_IS_NOT_KNOWN	REACTOME_RUNX1_INTERACTS_WITH_CO_FACTORS_WHOSE_PRECISE_EFFECT_ON_RUNX1_TARGETS_IS_NOT_KNOWN		37	0.309473	0.898113	0.587649	0.605971	1	9954	tags=32%, list=18%, signal=40%
REACTOME_PROTEIN_METHYLATION	REACTOME_PROTEIN_METHYLATION		17	0.358144	0.887685	0.588727	0.611863	1	12716	tags=41%, list=24%, signal=54%
REACTOME_ERK_MAPK_TARGETS	REACTOME_ERK_MAPK_TARGETS		22	0.333581	0.879561	0.589633	0.620107	1	4761	tags=27%, list=9%, signal=30%
REACTOME_REGULATION_OF_TP53_ACTIVITY_THROUGH_ACETYLATION	REACTOME_REGULATION_OF_TP53_ACTIVITY_THROUGH_ACETYLATION		30	0.334193	0.880207	0.593361	0.620114	1	10025	tags=30%, list=19%, signal=37%
REACTOME_MITOTIC_PROMETAPHASE	REACTOME_MITOTIC_PROMETAPHASE		203	0.274871	0.836183	0.593385	0.658321	1	13106	tags=33%, list=24%, signal=43%
REACTOME_PROTEIN_FOLDING	REACTOME_PROTEIN_FOLDING		97	0.251185	0.896258	0.59375	0.606834	1	12812	tags=31%, list=24%, signal=41%
REACTOME_DEFECTS_IN_VITAMIN_AND_COFACTOR_METABOLISM	REACTOME_DEFECTS_IN_VITAMIN_AND_COFACTOR_METABOLISM		22	0.300382	0.850628	0.594421	0.642943	1	4712	tags=23%, list=9%, signal=25%
REACTOME_GPVI_MEDIATED_ACTIVATION_CASCADE	REACTOME_GPVI_MEDIATED_ACTIVATION_CASCADE		35	0.29297	0.85784	0.594787	0.636116	1	5228	tags=20%, list=10%, signal=22%
REACTOME_E2F_MEDIATED_REGULATION_OF_DNA_REPLICATION	REACTOME_E2F_MEDIATED_REGULATION_OF_DNA_REPLICATION		22	0.384499	0.889183	0.594961	0.611626	1	15181	tags=45%, list=28%, signal=63%
REACTOME_RECEPTOR_TYPE_TYROSINE_PROTEIN_PHOSPHATASES	REACTOME_RECEPTOR_TYPE_TYROSINE_PROTEIN_PHOSPHATASES		20	0.292458	0.859266	0.5953	0.635095	1	13161	tags=45%, list=24%, signal=60%
REACTOME_NOREPINEPHRINE_NEUROTRANSMITTER_RELEASE_CYCLE	REACTOME_NOREPINEPHRINE_NEUROTRANSMITTER_RELEASE_CYCLE		18	0.298817	0.882969	0.595568	0.616927	1	3166	tags=17%, list=6%, signal=18%
REACTOME_INTERLEUKIN_7_SIGNALING	REACTOME_INTERLEUKIN_7_SIGNALING		34	0.275696	0.863918	0.600962	0.632086	1	9381	tags=29%, list=17%, signal=36%
REACTOME_FATTY_ACYL_COA_BIOSYNTHESIS	REACTOME_FATTY_ACYL_COA_BIOSYNTHESIS		37	0.265724	0.892602	0.601966	0.608472	1	6680	tags=19%, list=12%, signal=22%
REACTOME_NCAM_SIGNALING_FOR_NEURITE_OUT_GROWTH	REACTOME_NCAM_SIGNALING_FOR_NEURITE_OUT_GROWTH		63	0.238266	0.860047	0.60733	0.635861	1	5083	tags=16%, list=9%, signal=18%
REACTOME_FOXO_MEDIATED_TRANSCRIPTION_OF_CELL_CYCLE_GENES	REACTOME_FOXO_MEDIATED_TRANSCRIPTION_OF_CELL_CYCLE_GENES		17	0.324274	0.869701	0.6082	0.628649	1	1030	tags=12%, list=2%, signal=12%
REACTOME_NUCLEOBASE_BIOSYNTHESIS	REACTOME_NUCLEOBASE_BIOSYNTHESIS		15	0.412933	0.867925	0.608782	0.627361	1	17172	tags=67%, list=32%, signal=98%
REACTOME_DNA_REPAIR	REACTOME_DNA_REPAIR		332	0.265842	0.83825	0.611111	0.656394	1	15269	tags=39%, list=28%, signal=54%
REACTOME_RHO_GTPASES_ACTIVATE_PAKS	REACTOME_RHO_GTPASES_ACTIVATE_PAKS		21	0.338537	0.868276	0.611241	0.627913	1	9886	tags=43%, list=18%, signal=52%
REACTOME_N_GLYCAN_ANTENNAE_ELONGATION_IN_THE_MEDIAL_TRANS_GOLGI	REACTOME_N_GLYCAN_ANTENNAE_ELONGATION_IN_THE_MEDIAL_TRANS_GOLGI		26	0.272461	0.859388	0.617225	0.635856	1	13498	tags=38%, list=25%, signal=51%
REACTOME_HATS_ACETYLATE_HISTONES	REACTOME_HATS_ACETYLATE_HISTONES		139	0.267117	0.820023	0.619919	0.670096	1	9288	tags=24%, list=17%, signal=29%
REACTOME_KINESINS	REACTOME_KINESINS		61	0.260257	0.839712	0.622222	0.655242	1	12812	tags=30%, list=24%, signal=39%
REACTOME_ANCHORING_OF_THE_BASAL_BODY_TO_THE_PLASMA_MEMBRANE	REACTOME_ANCHORING_OF_THE_BASAL_BODY_TO_THE_PLASMA_MEMBRANE		97	0.263668	0.802926	0.622266	0.677826	1	13801	tags=35%, list=26%, signal=47%
REACTOME_DNA_STRAND_ELONGATION	REACTOME_DNA_STRAND_ELONGATION		32	0.383886	0.852089	0.627907	0.641765	1	17615	tags=50%, list=33%, signal=74%
REACTOME_RECRUITMENT_OF_MITOTIC_CENTROSOME_PROTEINS_AND_COMPLEXES	REACTOME_RECRUITMENT_OF_MITOTIC_CENTROSOME_PROTEINS_AND_COMPLEXES		81	0.275288	0.822306	0.628514	0.669899	1	13106	tags=38%, list=24%, signal=51%
REACTOME_RAP1_SIGNALLING	REACTOME_RAP1_SIGNALLING		16	0.318834	0.85584	0.63109	0.638161	1	806	tags=13%, list=1%, signal=13%
REACTOME_FOXO_MEDIATED_TRANSCRIPTION	REACTOME_FOXO_MEDIATED_TRANSCRIPTION		66	0.242002	0.869076	0.633495	0.627619	1	8959	tags=23%, list=17%, signal=27%
REACTOME_CELLULAR_SENESCENCE	REACTOME_CELLULAR_SENESCENCE		194	0.236101	0.828671	0.63354	0.666369	1	9527	tags=24%, list=18%, signal=29%
REACTOME_RESOLUTION_OF_SISTER_CHROMATID_COHESION	REACTOME_RESOLUTION_OF_SISTER_CHROMATID_COHESION		126	0.272187	0.786652	0.634	0.694259	1	13026	tags=32%, list=24%, signal=42%
REACTOME_SUMOYLATION_OF_TRANSCRIPTION_COFACTORS	REACTOME_SUMOYLATION_OF_TRANSCRIPTION_COFACTORS		43	0.274164	0.816004	0.638672	0.670723	1	7300	tags=21%, list=14%, signal=24%
REACTOME_ACYL_CHAIN_REMODELLING_OF_PS	REACTOME_ACYL_CHAIN_REMODELLING_OF_PS		22	0.270625	0.869405	0.639344	0.628129	1	1158	tags=14%, list=2%, signal=14%
REACTOME_HCMV_EARLY_EVENTS	REACTOME_HCMV_EARLY_EVENTS		135	0.26055	0.814203	0.639738	0.67037	1	14347	tags=34%, list=27%, signal=46%
REACTOME_TRANSCRIPTIONAL_REGULATION_BY_E2F6	REACTOME_TRANSCRIPTIONAL_REGULATION_BY_E2F6		34	0.308655	0.822218	0.639839	0.669125	1	15930	tags=44%, list=30%, signal=63%
REACTOME_DEFENSINS	REACTOME_DEFENSINS		49	0.211333	0.878599	0.642229	0.620516	1	4298	tags=14%, list=8%, signal=16%
REACTOME_NOTCH3_ACTIVATION_AND_TRANSMISSION_OF_SIGNAL_TO_THE_NUCLEUS	REACTOME_NOTCH3_ACTIVATION_AND_TRANSMISSION_OF_SIGNAL_TO_THE_NUCLEUS		25	0.278629	0.834082	0.643204	0.660597	1	10790	tags=28%, list=20%, signal=35%
REACTOME_G2_M_CHECKPOINTS	REACTOME_G2_M_CHECKPOINTS		168	0.274701	0.805532	0.643863	0.677142	1	14524	tags=35%, list=27%, signal=48%
REACTOME_PYROPTOSIS	REACTOME_PYROPTOSIS		27	0.281314	0.803166	0.644028	0.678524	1	3632	tags=19%, list=7%, signal=20%
REACTOME_RNA_POLYMERASE_I_TRANSCRIPTION_TERMINATION	REACTOME_RNA_POLYMERASE_I_TRANSCRIPTION_TERMINATION		31	0.309191	0.822932	0.645291	0.669889	1	8179	tags=29%, list=15%, signal=34%
REACTOME_DISEASES_OF_MITOTIC_CELL_CYCLE	REACTOME_DISEASES_OF_MITOTIC_CELL_CYCLE		38	0.290772	0.819181	0.646091	0.669285	1	14836	tags=45%, list=28%, signal=62%
REACTOME_EPIGENETIC_REGULATION_OF_GENE_EXPRESSION	REACTOME_EPIGENETIC_REGULATION_OF_GENE_EXPRESSION		146	0.263284	0.819247	0.648262	0.670177	1	13186	tags=33%, list=24%, signal=43%
REACTOME_PROCESSIVE_SYNTHESIS_ON_THE_LAGGING_STRAND	REACTOME_PROCESSIVE_SYNTHESIS_ON_THE_LAGGING_STRAND		15	0.38306	0.809583	0.648438	0.675105	1	19346	tags=60%, list=36%, signal=94%
REACTOME_VASOPRESSIN_REGULATES_RENAL_WATER_HOMEOSTASIS_VIA_AQUAPORINS	REACTOME_VASOPRESSIN_REGULATES_RENAL_WATER_HOMEOSTASIS_VIA_AQUAPORINS		43	0.24613	0.876886	0.651515	0.621101	1	10614	tags=28%, list=20%, signal=35%
REACTOME_G_ALPHA_12_13_SIGNALLING_EVENTS	REACTOME_G_ALPHA_12_13_SIGNALLING_EVENTS		80	0.234094	0.826502	0.652278	0.66768	1	10208	tags=29%, list=19%, signal=35%
REACTOME_ACTIVATION_OF_THE_PRE_REPLICATIVE_COMPLEX	REACTOME_ACTIVATION_OF_THE_PRE_REPLICATIVE_COMPLEX		33	0.333335	0.755843	0.655832	0.723005	1	15804	tags=42%, list=29%, signal=60%
REACTOME_PLATELET_CALCIUM_HOMEOSTASIS	REACTOME_PLATELET_CALCIUM_HOMEOSTASIS		28	0.276431	0.82524	0.657635	0.667525	1	3496	tags=18%, list=6%, signal=19%
REACTOME_MITOTIC_PROPHASE	REACTOME_MITOTIC_PROPHASE		141	0.26203	0.795479	0.658385	0.685579	1	9336	tags=23%, list=17%, signal=27%
REACTOME_GLYCOGEN_BREAKDOWN_GLYCOGENOLYSIS	REACTOME_GLYCOGEN_BREAKDOWN_GLYCOGENOLYSIS		15	0.320354	0.850584	0.661939	0.642028	1	7933	tags=33%, list=15%, signal=39%
REACTOME_VITAMIN_B5_PANTOTHENATE_METABOLISM	REACTOME_VITAMIN_B5_PANTOTHENATE_METABOLISM		17	0.291949	0.827347	0.665882	0.667459	1	11781	tags=41%, list=22%, signal=53%
REACTOME_RNA_POLYMERASE_III_TRANSCRIPTION_INITIATION_FROM_TYPE_1_PROMOTER	REACTOME_RNA_POLYMERASE_III_TRANSCRIPTION_INITIATION_FROM_TYPE_1_PROMOTER		28	0.307694	0.81658	0.665953	0.670872	1	10386	tags=43%, list=19%, signal=53%
REACTOME_CELL_CYCLE_CHECKPOINTS	REACTOME_CELL_CYCLE_CHECKPOINTS		292	0.255885	0.76476	0.667976	0.713376	1	14524	tags=34%, list=27%, signal=46%
REACTOME_SUMOYLATION_OF_DNA_DAMAGE_RESPONSE_AND_REPAIR_PROTEINS	REACTOME_SUMOYLATION_OF_DNA_DAMAGE_RESPONSE_AND_REPAIR_PROTEINS		77	0.271767	0.78239	0.669291	0.697664	1	14821	tags=35%, list=28%, signal=48%
REACTOME_DOWNSTREAM_SIGNALING_OF_ACTIVATED_FGFR4	REACTOME_DOWNSTREAM_SIGNALING_OF_ACTIVATED_FGFR4		27	0.248741	0.853835	0.670769	0.640209	1	4716	tags=19%, list=9%, signal=20%
REACTOME_SEMA3A_PAK_DEPENDENT_AXON_REPULSION	REACTOME_SEMA3A_PAK_DEPENDENT_AXON_REPULSION		16	0.30607	0.848248	0.674074	0.643667	1	15036	tags=50%, list=28%, signal=69%
REACTOME_ANTIGEN_PRESENTATION_FOLDING_ASSEMBLY_AND_PEPTIDE_LOADING_OF_CLASS_I_MHC	REACTOME_ANTIGEN_PRESENTATION_FOLDING_ASSEMBLY_AND_PEPTIDE_LOADING_OF_CLASS_I_MHC		25	0.327409	0.767415	0.67706	0.713585	1	16318	tags=48%, list=30%, signal=69%
REACTOME_PKMTS_METHYLATE_HISTONE_LYSINES	REACTOME_PKMTS_METHYLATE_HISTONE_LYSINES		69	0.256521	0.787375	0.678497	0.69426	1	9286	tags=26%, list=17%, signal=31%
REACTOME_FGFR2_MUTANT_RECEPTOR_ACTIVATION	REACTOME_FGFR2_MUTANT_RECEPTOR_ACTIVATION		33	0.250114	0.799771	0.680441	0.681308	1	7028	tags=24%, list=13%, signal=28%
REACTOME_REGULATION_OF_TP53_ACTIVITY_THROUGH_PHOSPHORYLATION	REACTOME_REGULATION_OF_TP53_ACTIVITY_THROUGH_PHOSPHORYLATION		92	0.255684	0.768327	0.683168	0.7132	1	8135	tags=23%, list=15%, signal=27%
REACTOME_CALNEXIN_CALRETICULIN_CYCLE	REACTOME_CALNEXIN_CALRETICULIN_CYCLE		26	0.296081	0.783119	0.685417	0.697558	1	8717	tags=27%, list=16%, signal=32%
REACTOME_G1_S_SPECIFIC_TRANSCRIPTION	REACTOME_G1_S_SPECIFIC_TRANSCRIPTION		29	0.303545	0.766915	0.686117	0.712301	1	13374	tags=41%, list=25%, signal=55%
REACTOME_DEFECTIVE_GALNT3_CAUSES_FAMILIAL_HYPERPHOSPHATEMIC_TUMORAL_CALCINOSIS_HFTC	REACTOME_DEFECTIVE_GALNT3_CAUSES_FAMILIAL_HYPERPHOSPHATEMIC_TUMORAL_CALCINOSIS_HFTC		16	0.309663	0.821925	0.686335	0.668449	1	12727	tags=44%, list=24%, signal=57%
REACTOME_NUCLEAR_EVENTS_KINASE_AND_TRANSCRIPTION_FACTOR_ACTIVATION	REACTOME_NUCLEAR_EVENTS_KINASE_AND_TRANSCRIPTION_FACTOR_ACTIVATION		61	0.244506	0.781114	0.686937	0.698479	1	7405	tags=26%, list=14%, signal=30%
REACTOME_INHIBITION_OF_THE_PROTEOLYTIC_ACTIVITY_OF_APC_C_REQUIRED_FOR_THE_ONSET_OF_ANAPHASE_BY_MITOTIC_SPINDLE_CHECKPOINT_COMPONENTS	REACTOME_INHIBITION_OF_THE_PROTEOLYTIC_ACTIVITY_OF_APC_C_REQUIRED_FOR_THE_ONSET_OF_ANAPHASE_BY_MITOTIC_SPINDLE_CHECKPOINT_COMPONENTS		21	0.336646	0.792538	0.691235	0.688905	1	16818	tags=62%, list=31%, signal=90%
REACTOME_HCMV_LATE_EVENTS	REACTOME_HCMV_LATE_EVENTS		113	0.249219	0.747449	0.694093	0.730547	1	13026	tags=31%, list=24%, signal=41%
REACTOME_LAGGING_STRAND_SYNTHESIS	REACTOME_LAGGING_STRAND_SYNTHESIS		20	0.345642	0.758309	0.695906	0.720767	1	12023	tags=30%, list=22%, signal=39%
REACTOME_COSTIMULATION_BY_THE_CD28_FAMILY	REACTOME_COSTIMULATION_BY_THE_CD28_FAMILY		72	0.253667	0.760574	0.697674	0.718412	1	10081	tags=26%, list=19%, signal=32%
REACTOME_TRANSPORT_OF_VITAMINS_NUCLEOSIDES_AND_RELATED_MOLECULES	REACTOME_TRANSPORT_OF_VITAMINS_NUCLEOSIDES_AND_RELATED_MOLECULES		44	0.223257	0.818212	0.701058	0.669589	1	11665	tags=32%, list=22%, signal=41%
REACTOME_FC_EPSILON_RECEPTOR_FCERI_SIGNALING	REACTOME_FC_EPSILON_RECEPTOR_FCERI_SIGNALING		186	0.228355	0.767372	0.702564	0.712656	1	8043	tags=24%, list=15%, signal=28%
REACTOME_PI_3K_CASCADE_FGFR1	REACTOME_PI_3K_CASCADE_FGFR1		21	0.263778	0.809959	0.705357	0.675517	1	4026	tags=14%, list=7%, signal=15%
REACTOME_INTEGRATION_OF_ENERGY_METABOLISM	REACTOME_INTEGRATION_OF_ENERGY_METABOLISM		108	0.20277	0.80585	0.706493	0.677685	1	10990	tags=27%, list=20%, signal=34%
REACTOME_TRANSPORT_OF_BILE_SALTS_AND_ORGANIC_ACIDS_METAL_IONS_AND_AMINE_COMPOUNDS	REACTOME_TRANSPORT_OF_BILE_SALTS_AND_ORGANIC_ACIDS_METAL_IONS_AND_AMINE_COMPOUNDS		85	0.211624	0.826123	0.711111	0.667255	1	5784	tags=16%, list=11%, signal=18%
REACTOME_MECP2_REGULATES_NEURONAL_RECEPTORS_AND_CHANNELS	REACTOME_MECP2_REGULATES_NEURONAL_RECEPTORS_AND_CHANNELS		18	0.267753	0.814914	0.711538	0.671401	1	8959	tags=28%, list=17%, signal=33%
REACTOME_DISEASES_OF_METABOLISM	REACTOME_DISEASES_OF_METABOLISM		246	0.199968	0.807695	0.712794	0.676981	1	11757	tags=26%, list=22%, signal=34%
REACTOME_TRANSCRIPTIONAL_REGULATION_BY_SMALL_RNAS	REACTOME_TRANSCRIPTIONAL_REGULATION_BY_SMALL_RNAS		105	0.242221	0.71113	0.721174	0.755419	1	9288	tags=23%, list=17%, signal=28%
REACTOME_FANCONI_ANEMIA_PATHWAY	REACTOME_FANCONI_ANEMIA_PATHWAY		39	0.262828	0.718445	0.722222	0.746586	1	3583	tags=15%, list=7%, signal=16%
REACTOME_GENE_SILENCING_BY_RNA	REACTOME_GENE_SILENCING_BY_RNA		138	0.226175	0.733494	0.728238	0.738114	1	9288	tags=22%, list=17%, signal=26%
REACTOME_POTENTIAL_THERAPEUTICS_FOR_SARS	REACTOME_POTENTIAL_THERAPEUTICS_FOR_SARS		81	0.231793	0.784998	0.728477	0.695659	1	4027	tags=15%, list=7%, signal=16%
REACTOME_CYTOSOLIC_SULFONATION_OF_SMALL_MOLECULES	REACTOME_CYTOSOLIC_SULFONATION_OF_SMALL_MOLECULES		24	0.259718	0.804921	0.731429	0.676994	1	4430	tags=17%, list=8%, signal=18%
REACTOME_METABOLISM_OF_FAT_SOLUBLE_VITAMINS	REACTOME_METABOLISM_OF_FAT_SOLUBLE_VITAMINS		48	0.21804	0.72316	0.733108	0.745158	1	2656	tags=10%, list=5%, signal=11%
REACTOME_DOPAMINE_NEUROTRANSMITTER_RELEASE_CYCLE	REACTOME_DOPAMINE_NEUROTRANSMITTER_RELEASE_CYCLE		23	0.254846	0.768782	0.733974	0.713525	1	7044	tags=22%, list=13%, signal=25%
REACTOME_PLASMA_LIPOPROTEIN_ASSEMBLY	REACTOME_PLASMA_LIPOPROTEIN_ASSEMBLY		19	0.273711	0.720036	0.734211	0.746463	1	6711	tags=16%, list=12%, signal=18%
REACTOME_PHOSPHORYLATION_OF_THE_APC_C	REACTOME_PHOSPHORYLATION_OF_THE_APC_C		20	0.319497	0.745503	0.736948	0.731209	1	9231	tags=35%, list=17%, signal=42%
REACTOME_HIV_TRANSCRIPTION_INITIATION	REACTOME_HIV_TRANSCRIPTION_INITIATION		47	0.268835	0.745905	0.738095	0.731775	1	8179	tags=28%, list=15%, signal=33%
REACTOME_PI_3K_CASCADE_FGFR3	REACTOME_PI_3K_CASCADE_FGFR3		18	0.26358	0.806544	0.739003	0.677694	1	4026	tags=17%, list=7%, signal=18%
REACTOME_HDR_THROUGH_HOMOLOGOUS_RECOMBINATION_HRR	REACTOME_HDR_THROUGH_HOMOLOGOUS_RECOMBINATION_HRR		67	0.247564	0.6847	0.744422	0.781272	1	8327	tags=22%, list=15%, signal=26%
REACTOME_BILE_ACID_AND_BILE_SALT_METABOLISM	REACTOME_BILE_ACID_AND_BILE_SALT_METABOLISM		43	0.220985	0.814354	0.747191	0.67116	1	17856	tags=44%, list=33%, signal=66%
REACTOME_VEGFR2_MEDIATED_CELL_PROLIFERATION	REACTOME_VEGFR2_MEDIATED_CELL_PROLIFERATION		19	0.258028	0.745359	0.748184	0.73043	1	11788	tags=37%, list=22%, signal=47%
REACTOME_INTERLEUKIN_6_FAMILY_SIGNALING	REACTOME_INTERLEUKIN_6_FAMILY_SIGNALING		24	0.25505	0.722929	0.748744	0.744498	1	17367	tags=54%, list=32%, signal=80%
REACTOME_RNA_POLYMERASE_III_TRANSCRIPTION	REACTOME_RNA_POLYMERASE_III_TRANSCRIPTION		41	0.2534	0.731738	0.748963	0.738611	1	10386	tags=34%, list=19%, signal=42%
REACTOME_MITOTIC_SPINDLE_CHECKPOINT	REACTOME_MITOTIC_SPINDLE_CHECKPOINT		111	0.250484	0.686589	0.75	0.779785	1	12052	tags=29%, list=22%, signal=37%
REACTOME_SYNTHESIS_OF_PA	REACTOME_SYNTHESIS_OF_PA		39	0.234273	0.741496	0.757106	0.731966	1	9001	tags=31%, list=17%, signal=37%
REACTOME_MET_PROMOTES_CELL_MOTILITY	REACTOME_MET_PROMOTES_CELL_MOTILITY		41	0.237047	0.695956	0.760766	0.771713	1	15762	tags=37%, list=29%, signal=52%
REACTOME_MAPK_TARGETS_NUCLEAR_EVENTS_MEDIATED_BY_MAP_KINASES	REACTOME_MAPK_TARGETS_NUCLEAR_EVENTS_MEDIATED_BY_MAP_KINASES		31	0.263142	0.736756	0.766454	0.736519	1	9433	tags=29%, list=18%, signal=35%
REACTOME_INTERFERON_ALPHA_BETA_SIGNALING	REACTOME_INTERFERON_ALPHA_BETA_SIGNALING		73	0.215224	0.648643	0.76659	0.820525	1	12034	tags=29%, list=22%, signal=37%
REACTOME_RUNX1_REGULATES_TRANSCRIPTION_OF_GENES_INVOLVED_IN_DIFFERENTIATION_OF_HSCS	REACTOME_RUNX1_REGULATES_TRANSCRIPTION_OF_GENES_INVOLVED_IN_DIFFERENTIATION_OF_HSCS		128	0.217352	0.687567	0.768578	0.780544	1	13027	tags=28%, list=24%, signal=37%
REACTOME_BASIGIN_INTERACTIONS	REACTOME_BASIGIN_INTERACTIONS		25	0.246469	0.765954	0.771084	0.712661	1	5752	tags=16%, list=11%, signal=18%
REACTOME_NGF_STIMULATED_TRANSCRIPTION	REACTOME_NGF_STIMULATED_TRANSCRIPTION		39	0.232137	0.703813	0.771972	0.763989	1	8536	tags=28%, list=16%, signal=33%
REACTOME_METABOLIC_DISORDERS_OF_BIOLOGICAL_OXIDATION_ENZYMES	REACTOME_METABOLIC_DISORDERS_OF_BIOLOGICAL_OXIDATION_ENZYMES		34	0.232532	0.792401	0.772595	0.688125	1	8678	tags=21%, list=16%, signal=25%
REACTOME_FGFR1_LIGAND_BINDING_AND_ACTIVATION	REACTOME_FGFR1_LIGAND_BINDING_AND_ACTIVATION		16	0.267429	0.721857	0.7737	0.74501	1	2842	tags=13%, list=5%, signal=13%
REACTOME_PLATELET_AGGREGATION_PLUG_FORMATION	REACTOME_PLATELET_AGGREGATION_PLUG_FORMATION		38	0.22531	0.748426	0.77561	0.730215	1	8966	tags=21%, list=17%, signal=25%
REACTOME_SIGNAL_AMPLIFICATION	REACTOME_SIGNAL_AMPLIFICATION		33	0.231435	0.75343	0.776961	0.725266	1	10361	tags=27%, list=19%, signal=34%
REACTOME_ROS_AND_RNS_PRODUCTION_IN_PHAGOCYTES	REACTOME_ROS_AND_RNS_PRODUCTION_IN_PHAGOCYTES		36	0.237039	0.734945	0.777778	0.738048	1	13529	tags=42%, list=25%, signal=56%
REACTOME_DETOXIFICATION_OF_REACTIVE_OXYGEN_SPECIES	REACTOME_DETOXIFICATION_OF_REACTIVE_OXYGEN_SPECIES		37	0.22448	0.727728	0.77907	0.74096	1	10661	tags=27%, list=20%, signal=34%
REACTOME_INTEGRIN_SIGNALING	REACTOME_INTEGRIN_SIGNALING		27	0.238067	0.72773	0.781182	0.741951	1	8966	tags=22%, list=17%, signal=27%
REACTOME_AFLATOXIN_ACTIVATION_AND_DETOXIFICATION	REACTOME_AFLATOXIN_ACTIVATION_AND_DETOXIFICATION		19	0.232094	0.734371	0.783042	0.73788	1	1340	tags=11%, list=2%, signal=11%
REACTOME_REGULATION_OF_PTEN_GENE_TRANSCRIPTION	REACTOME_REGULATION_OF_PTEN_GENE_TRANSCRIPTION		61	0.224403	0.687479	0.783401	0.779627	1	9286	tags=21%, list=17%, signal=26%
REACTOME_CD28_DEPENDENT_PI3K_AKT_SIGNALING	REACTOME_CD28_DEPENDENT_PI3K_AKT_SIGNALING		22	0.260945	0.743214	0.783908	0.731429	1	9309	tags=27%, list=17%, signal=33%
REACTOME_OXIDATIVE_STRESS_INDUCED_SENESCENCE	REACTOME_OXIDATIVE_STRESS_INDUCED_SENESCENCE		122	0.212227	0.689777	0.788793	0.778694	1	3583	tags=12%, list=7%, signal=13%
REACTOME_TRAF6_MEDIATED_IRF7_ACTIVATION	REACTOME_TRAF6_MEDIATED_IRF7_ACTIVATION		29	0.208957	0.679652	0.794492	0.785776	1	14476	tags=38%, list=27%, signal=52%
REACTOME_SENESCENCE_ASSOCIATED_SECRETORY_PHENOTYPE_SASP	REACTOME_SENESCENCE_ASSOCIATED_SECRETORY_PHENOTYPE_SASP		110	0.210633	0.683534	0.794872	0.781942	1	10580	tags=25%, list=20%, signal=32%
REACTOME_ACETYLCHOLINE_NEUROTRANSMITTER_RELEASE_CYCLE	REACTOME_ACETYLCHOLINE_NEUROTRANSMITTER_RELEASE_CYCLE		17	0.251036	0.728028	0.796296	0.742564	1	5181	tags=18%, list=10%, signal=20%
REACTOME_SYNAPTIC_ADHESION_LIKE_MOLECULES	REACTOME_SYNAPTIC_ADHESION_LIKE_MOLECULES		21	0.242059	0.772168	0.797222	0.709486	1	12157	tags=33%, list=23%, signal=43%
REACTOME_N_GLYCAN_ANTENNAE_ELONGATION	REACTOME_N_GLYCAN_ANTENNAE_ELONGATION		15	0.25295	0.719829	0.798489	0.745818	1	2852	tags=13%, list=5%, signal=14%
REACTOME_METABOLISM_OF_VITAMINS_AND_COFACTORS	REACTOME_METABOLISM_OF_VITAMINS_AND_COFACTORS		189	0.190745	0.748517	0.8	0.731152	1	10310	tags=22%, list=19%, signal=27%
REACTOME_SIGNALING_BY_NOTCH3	REACTOME_SIGNALING_BY_NOTCH3		49	0.216823	0.744977	0.8	0.730019	1	3612	tags=14%, list=7%, signal=15%
REACTOME_EGR2_AND_SOX10_MEDIATED_INITIATION_OF_SCHWANN_CELL_MYELINATION	REACTOME_EGR2_AND_SOX10_MEDIATED_INITIATION_OF_SCHWANN_CELL_MYELINATION		28	0.221052	0.673396	0.803398	0.793048	1	11425	tags=29%, list=21%, signal=36%
REACTOME_ENDOGENOUS_STEROLS	REACTOME_ENDOGENOUS_STEROLS		27	0.227239	0.776304	0.808023	0.704325	1	265	tags=7%, list=0%, signal=7%
REACTOME_PLATELET_ACTIVATION_SIGNALING_AND_AGGREGATION	REACTOME_PLATELET_ACTIVATION_SIGNALING_AND_AGGREGATION		260	0.190781	0.724062	0.812658	0.744941	1	9325	tags=22%, list=17%, signal=26%
REACTOME_HEPARAN_SULFATE_HEPARIN_HS_GAG_METABOLISM	REACTOME_HEPARAN_SULFATE_HEPARIN_HS_GAG_METABOLISM		55	0.206411	0.743135	0.816754	0.730525	1	8090	tags=20%, list=15%, signal=24%
REACTOME_DNA_DOUBLE_STRAND_BREAK_REPAIR	REACTOME_DNA_DOUBLE_STRAND_BREAK_REPAIR		167	0.209391	0.641663	0.83125	0.825577	1	14383	tags=32%, list=27%, signal=43%
REACTOME_CARGO_TRAFFICKING_TO_THE_PERICILIARY_MEMBRANE	REACTOME_CARGO_TRAFFICKING_TO_THE_PERICILIARY_MEMBRANE		51	0.210504	0.657901	0.834746	0.811032	1	5682	tags=14%, list=11%, signal=15%
REACTOME_POST_TRANSLATIONAL_MODIFICATION_SYNTHESIS_OF_GPI_ANCHORED_PROTEINS	REACTOME_POST_TRANSLATIONAL_MODIFICATION_SYNTHESIS_OF_GPI_ANCHORED_PROTEINS		93	0.179472	0.795958	0.835125	0.68582	1	3597	tags=12%, list=7%, signal=13%
REACTOME_IRE1ALPHA_ACTIVATES_CHAPERONES	REACTOME_IRE1ALPHA_ACTIVATES_CHAPERONES		49	0.216363	0.615587	0.837209	0.854793	1	15940	tags=41%, list=30%, signal=58%
REACTOME_OLFACTORY_SIGNALING_PATHWAY	REACTOME_OLFACTORY_SIGNALING_PATHWAY		383	0.157331	0.736894	0.842105	0.73736	1	12284	tags=27%, list=23%, signal=34%
REACTOME_SYNTHESIS_OF_BILE_ACIDS_AND_BILE_SALTS	REACTOME_SYNTHESIS_OF_BILE_ACIDS_AND_BILE_SALTS		34	0.212407	0.732442	0.842697	0.738798	1	17856	tags=47%, list=33%, signal=70%
REACTOME_MATURATION_OF_SARS_COV_2_SPIKE_PROTEIN	REACTOME_MATURATION_OF_SARS_COV_2_SPIKE_PROTEIN		29	0.232004	0.643541	0.846652	0.824409	1	4447	tags=14%, list=8%, signal=15%
REACTOME_YAP1_AND_WWTR1_TAZ_STIMULATED_GENE_EXPRESSION	REACTOME_YAP1_AND_WWTR1_TAZ_STIMULATED_GENE_EXPRESSION		15	0.251811	0.670771	0.853234	0.79537	1	12991	tags=40%, list=24%, signal=53%
REACTOME_TRNA_MODIFICATION_IN_THE_NUCLEUS_AND_CYTOSOL	REACTOME_TRNA_MODIFICATION_IN_THE_NUCLEUS_AND_CYTOSOL		43	0.231122	0.591349	0.85447	0.873919	1	12667	tags=33%, list=24%, signal=43%
REACTOME_PHASE_4_RESTING_MEMBRANE_POTENTIAL	REACTOME_PHASE_4_RESTING_MEMBRANE_POTENTIAL		19	0.224422	0.71063	0.861487	0.755101	1	3561	tags=16%, list=7%, signal=17%
REACTOME_CILIUM_ASSEMBLY	REACTOME_CILIUM_ASSEMBLY		202	0.178859	0.596948	0.863918	0.86917	1	13106	tags=26%, list=24%, signal=35%
REACTOME_TELOMERE_MAINTENANCE	REACTOME_TELOMERE_MAINTENANCE		113	0.196825	0.583684	0.870293	0.880786	1	12926	tags=27%, list=24%, signal=36%
REACTOME_SUMOYLATION_OF_CHROMATIN_ORGANIZATION_PROTEINS	REACTOME_SUMOYLATION_OF_CHROMATIN_ORGANIZATION_PROTEINS		71	0.194389	0.573315	0.872984	0.890114	1	14821	tags=34%, list=28%, signal=47%
REACTOME_TELOMERE_C_STRAND_LAGGING_STRAND_SYNTHESIS	REACTOME_TELOMERE_C_STRAND_LAGGING_STRAND_SYNTHESIS		34	0.210458	0.529137	0.875752	0.923421	1	12309	tags=29%, list=23%, signal=38%
REACTOME_PI_3K_CASCADE_FGFR4	REACTOME_PI_3K_CASCADE_FGFR4		20	0.226877	0.698556	0.877814	0.768953	1	9309	tags=25%, list=17%, signal=30%
REACTOME_G_ALPHA_Z_SIGNALLING_EVENTS	REACTOME_G_ALPHA_Z_SIGNALLING_EVENTS		48	0.196413	0.699862	0.881748	0.76822	1	10614	tags=23%, list=20%, signal=29%
REACTOME_INSULIN_PROCESSING	REACTOME_INSULIN_PROCESSING		27	0.199196	0.650972	0.895262	0.81862	1	4212	tags=15%, list=8%, signal=16%
REACTOME_INTERLEUKIN_4_AND_INTERLEUKIN_13_SIGNALING	REACTOME_INTERLEUKIN_4_AND_INTERLEUKIN_13_SIGNALING		111	0.177528	0.609513	0.895288	0.859531	1	7341	tags=17%, list=14%, signal=20%
REACTOME_DISEASES_OF_PROGRAMMED_CELL_DEATH	REACTOME_DISEASES_OF_PROGRAMMED_CELL_DEATH		100	0.186792	0.565677	0.900648	0.895215	1	13186	tags=28%, list=24%, signal=37%
REACTOME_METABOLISM_OF_WATER_SOLUBLE_VITAMINS_AND_COFACTORS	REACTOME_METABOLISM_OF_WATER_SOLUBLE_VITAMINS_AND_COFACTORS		123	0.173625	0.648222	0.903704	0.81994	1	6525	tags=16%, list=12%, signal=18%
REACTOME_REGULATION_OF_KIT_SIGNALING	REACTOME_REGULATION_OF_KIT_SIGNALING		16	0.230666	0.60507	0.909091	0.863462	1	7407	tags=25%, list=14%, signal=29%
REACTOME_ACTIVATION_OF_ATR_IN_RESPONSE_TO_REPLICATION_STRESS	REACTOME_ACTIVATION_OF_ATR_IN_RESPONSE_TO_REPLICATION_STRESS		37	0.175167	0.411189	0.926782	0.981313	1	13215	tags=30%, list=25%, signal=39%
REACTOME_TFAP2_AP_2_FAMILY_REGULATES_TRANSCRIPTION_OF_GROWTH_FACTORS_AND_THEIR_RECEPTORS	REACTOME_TFAP2_AP_2_FAMILY_REGULATES_TRANSCRIPTION_OF_GROWTH_FACTORS_AND_THEIR_RECEPTORS		15	0.22107	0.610508	0.930599	0.859494	1	6976	tags=20%, list=13%, signal=23%
REACTOME_METAL_ION_SLC_TRANSPORTERS	REACTOME_METAL_ION_SLC_TRANSPORTERS		26	0.191399	0.573153	0.933025	0.889195	1	5784	tags=15%, list=11%, signal=17%
REACTOME_SYNDECAN_INTERACTIONS	REACTOME_SYNDECAN_INTERACTIONS		27	0.184826	0.45135	0.935714	0.968129	1	13693	tags=30%, list=25%, signal=40%
REACTOME_CHROMOSOME_MAINTENANCE	REACTOME_CHROMOSOME_MAINTENANCE		140	0.16109	0.474648	0.937759	0.957456	1	7211	tags=14%, list=13%, signal=16%
REACTOME_HOMOLOGY_DIRECTED_REPAIR	REACTOME_HOMOLOGY_DIRECTED_REPAIR		138	0.162535	0.489632	0.938017	0.949462	1	12398	tags=23%, list=23%, signal=30%
REACTOME_SEROTONIN_NEUROTRANSMITTER_RELEASE_CYCLE	REACTOME_SEROTONIN_NEUROTRANSMITTER_RELEASE_CYCLE		18	0.206933	0.599787	0.94081	0.868299	1	3166	tags=11%, list=6%, signal=12%
REACTOME_DISEASES_ASSOCIATED_WITH_N_GLYCOSYLATION_OF_PROTEINS	REACTOME_DISEASES_ASSOCIATED_WITH_N_GLYCOSYLATION_OF_PROTEINS		17	0.198191	0.448627	0.947791	0.968213	1	13498	tags=35%, list=25%, signal=47%
REACTOME_ZINC_TRANSPORTERS	REACTOME_ZINC_TRANSPORTERS		17	0.200994	0.536785	0.95614	0.918217	1	5784	tags=18%, list=11%, signal=20%
REACTOME_RET_SIGNALING	REACTOME_RET_SIGNALING		40	0.175924	0.597014	0.957547	0.870214	1	9309	tags=23%, list=17%, signal=27%
REACTOME_OTHER_INTERLEUKIN_SIGNALING	REACTOME_OTHER_INTERLEUKIN_SIGNALING		24	0.172974	0.536918	0.961353	0.919276	1	9519	tags=21%, list=18%, signal=25%
REACTOME_ABERRANT_REGULATION_OF_MITOTIC_G1_S_TRANSITION_IN_CANCER_DUE_TO_RB1_DEFECTS	REACTOME_ABERRANT_REGULATION_OF_MITOTIC_G1_S_TRANSITION_IN_CANCER_DUE_TO_RB1_DEFECTS		17	0.212669	0.56269	0.962791	0.897028	1	2814	tags=12%, list=5%, signal=12%
REACTOME_IL_6_TYPE_CYTOKINE_RECEPTOR_LIGAND_INTERACTIONS	REACTOME_IL_6_TYPE_CYTOKINE_RECEPTOR_LIGAND_INTERACTIONS		17	0.178013	0.500078	0.98645	0.943879	1	17367	tags=53%, list=32%, signal=78%
REACTOME_SYNTHESIS_OF_PIPS_AT_THE_EARLY_ENDOSOME_MEMBRANE	REACTOME_SYNTHESIS_OF_PIPS_AT_THE_EARLY_ENDOSOME_MEMBRANE		16	0.16653	0.390555	0.995816	0.985848	1	11549	tags=25%, list=21%, signal=32%

## Sheet: Blad2
NAME	GS<br> follow link to MSigDB	GS DETAILS	SIZE	ES	NES	NOM p-val	FDR q-val	FWER p-val	RANK AT MAX	LEADING EDGE
KEGG_HISTIDINE_METABOLISM	KEGG_HISTIDINE_METABOLISM	Details ...	29	0.570614	1.96619	0	0.187709	0.065	6974	tags=45%, list=13%, signal=51%
KEGG_GLYCOLYSIS_GLUCONEOGENESIS	KEGG_GLYCOLYSIS_GLUCONEOGENESIS	Details ...	61	0.554772	1.91158	0	0.205679	0.117	7257	tags=43%, list=13%, signal=49%
KEGG_TIGHT_JUNCTION	KEGG_TIGHT_JUNCTION	Details ...	131	0.465425	1.8276	0.00510204	0.317294	0.22	10688	tags=44%, list=20%, signal=55%
KEGG_BETA_ALANINE_METABOLISM	KEGG_BETA_ALANINE_METABOLISM	Details ...	22	0.527902	1.67352	0.0179028	0.456243	0.428	8985	tags=41%, list=17%, signal=49%
KEGG_ARGININE_AND_PROLINE_METABOLISM	KEGG_ARGININE_AND_PROLINE_METABOLISM	Details ...	54	0.471966	1.62023	0.0209424	0.489391	0.509	9354	tags=41%, list=17%, signal=49%
KEGG_VALINE_LEUCINE_AND_ISOLEUCINE_DEGRADATION	KEGG_VALINE_LEUCINE_AND_ISOLEUCINE_DEGRADATION	Details ...	44	0.593772	1.7078	0.0224719	0.634168	0.365	5955	tags=34%, list=11%, signal=38%
KEGG_ADHERENS_JUNCTION	KEGG_ADHERENS_JUNCTION	Details ...	73	0.528025	1.68712	0.0244989	0.583722	0.406	7407	tags=41%, list=14%, signal=48%
KEGG_TYROSINE_METABOLISM	KEGG_TYROSINE_METABOLISM	Details ...	42	0.41881	1.60391	0.0345821	0.441036	0.54	9212	tags=40%, list=17%, signal=49%
KEGG_FATTY_ACID_METABOLISM	KEGG_FATTY_ACID_METABOLISM	Details ...	42	0.540647	1.675	0.044289	0.526331	0.424	8500	tags=38%, list=16%, signal=45%
KEGG_PATHOGENIC_ESCHERICHIA_COLI_INFECTION	KEGG_PATHOGENIC_ESCHERICHIA_COLI_INFECTION	Details ...	56	0.486141	1.61017	0.0461165	0.46523	0.525	6983	tags=36%, list=13%, signal=41%
KEGG_HEDGEHOG_SIGNALING_PATHWAY	KEGG_HEDGEHOG_SIGNALING_PATHWAY	Details ...	56	0.400718	1.44232	0.0463918	0.593148	0.749	8392	tags=32%, list=16%, signal=38%
KEGG_PROPANOATE_METABOLISM	KEGG_PROPANOATE_METABOLISM	Details ...	33	0.55992	1.59012	0.0533333	0.440611	0.561	8182	tags=36%, list=15%, signal=43%
KEGG_GALACTOSE_METABOLISM	KEGG_GALACTOSE_METABOLISM	Details ...	26	0.541475	1.62346	0.0552885	0.54289	0.505	7351	tags=38%, list=14%, signal=45%
KEGG_FRUCTOSE_AND_MANNOSE_METABOLISM	KEGG_FRUCTOSE_AND_MANNOSE_METABOLISM	Details ...	34	0.534116	1.54843	0.0642857	0.509982	0.619	7257	tags=38%, list=13%, signal=44%
KEGG_CYSTEINE_AND_METHIONINE_METABOLISM	KEGG_CYSTEINE_AND_METHIONINE_METABOLISM	Details ...	34	0.501154	1.53962	0.0710901	0.495365	0.629	13186	tags=38%, list=24%, signal=51%
KEGG_STARCH_AND_SUCROSE_METABOLISM	KEGG_STARCH_AND_SUCROSE_METABOLISM	Details ...	52	0.396539	1.44552	0.0761905	0.696481	0.748	11597	tags=46%, list=22%, signal=59%
KEGG_P53_SIGNALING_PATHWAY	KEGG_P53_SIGNALING_PATHWAY	Details ...	68	0.418827	1.44333	0.0822943	0.624004	0.749	13027	tags=47%, list=24%, signal=62%
KEGG_MELANOGENESIS	KEGG_MELANOGENESIS		101	0.340633	1.34336	0.0914127	0.486256	0.827	4945	tags=23%, list=9%, signal=25%
KEGG_GLYCEROLIPID_METABOLISM	KEGG_GLYCEROLIPID_METABOLISM		49	0.394363	1.40218	0.1025	0.557066	0.779	14492	tags=49%, list=27%, signal=67%
KEGG_TRYPTOPHAN_METABOLISM	KEGG_TRYPTOPHAN_METABOLISM		40	0.384935	1.39608	0.103825	0.527097	0.783	6664	tags=25%, list=12%, signal=29%
KEGG_STEROID_BIOSYNTHESIS	KEGG_STEROID_BIOSYNTHESIS	Details ...	17	0.53056	1.44503	0.107551	0.656741	0.748	9283	tags=41%, list=17%, signal=50%
KEGG_NEUROTROPHIN_SIGNALING_PATHWAY	KEGG_NEUROTROPHIN_SIGNALING_PATHWAY		126	0.412268	1.42079	0.10962	0.561733	0.767	5144	tags=29%, list=10%, signal=32%
KEGG_LONG_TERM_POTENTIATION	KEGG_LONG_TERM_POTENTIATION		70	0.380549	1.35854	0.110565	0.515507	0.816	6835	tags=27%, list=13%, signal=31%
KEGG_CARDIAC_MUSCLE_CONTRACTION	KEGG_CARDIAC_MUSCLE_CONTRACTION		75	0.331638	1.35329	0.119048	0.4962	0.82	8160	tags=27%, list=15%, signal=31%
KEGG_GLYCOSPHINGOLIPID_BIOSYNTHESIS_LACTO_AND_NEOLACTO_SERIES	KEGG_GLYCOSPHINGOLIPID_BIOSYNTHESIS_LACTO_AND_NEOLACTO_SERIES		26	0.412164	1.3346	0.119534	0.478108	0.837	4473	tags=31%, list=8%, signal=34%
KEGG_PHENYLALANINE_METABOLISM	KEGG_PHENYLALANINE_METABOLISM		18	0.426182	1.35687	0.12	0.502877	0.818	9212	tags=44%, list=17%, signal=54%
KEGG_RETINOL_METABOLISM	KEGG_RETINOL_METABOLISM		64	0.387525	1.42313	0.122257	0.583625	0.767	11597	tags=42%, list=22%, signal=54%
KEGG_ENDOCYTOSIS	KEGG_ENDOCYTOSIS		181	0.385575	1.39416	0.127273	0.493442	0.783	12178	tags=41%, list=23%, signal=53%
KEGG_PORPHYRIN_AND_CHLOROPHYLL_METABOLISM	KEGG_PORPHYRIN_AND_CHLOROPHYLL_METABOLISM		41	0.43716	1.39794	0.129973	0.544187	0.781	11597	tags=46%, list=22%, signal=59%
KEGG_VASOPRESSIN_REGULATED_WATER_REABSORPTION	KEGG_VASOPRESSIN_REGULATED_WATER_REABSORPTION		44	0.448599	1.39604	0.136574	0.507646	0.783	11290	tags=41%, list=21%, signal=52%
KEGG_AXON_GUIDANCE	KEGG_AXON_GUIDANCE		129	0.347439	1.33413	0.136816	0.454126	0.837	6835	tags=29%, list=13%, signal=33%
KEGG_ALANINE_ASPARTATE_AND_GLUTAMATE_METABOLISM	KEGG_ALANINE_ASPARTATE_AND_GLUTAMATE_METABOLISM		32	0.410519	1.33433	0.138889	0.465919	0.837	11543	tags=44%, list=21%, signal=56%
KEGG_BIOSYNTHESIS_OF_UNSATURATED_FATTY_ACIDS	KEGG_BIOSYNTHESIS_OF_UNSATURATED_FATTY_ACIDS		22	0.476703	1.3881	0.140187	0.489978	0.794	14394	tags=55%, list=27%, signal=74%
KEGG_ARACHIDONIC_ACID_METABOLISM	KEGG_ARACHIDONIC_ACID_METABOLISM		58	0.323543	1.28127	0.147651	0.51385	0.885	6422	tags=26%, list=12%, signal=29%
KEGG_EPITHELIAL_CELL_SIGNALING_IN_HELICOBACTER_PYLORI_INFECTION	KEGG_EPITHELIAL_CELL_SIGNALING_IN_HELICOBACTER_PYLORI_INFECTION		68	0.417439	1.38565	0.147806	0.47783	0.795	14342	tags=50%, list=27%, signal=68%
KEGG_PENTOSE_PHOSPHATE_PATHWAY	KEGG_PENTOSE_PHOSPHATE_PATHWAY	Details ...	27	0.503323	1.43407	0.154734	0.584477	0.758	8939	tags=44%, list=17%, signal=53%
KEGG_APOPTOSIS	KEGG_APOPTOSIS		87	0.418553	1.34321	0.160998	0.473337	0.828	11370	tags=39%, list=21%, signal=49%
KEGG_RENAL_CELL_CARCINOMA	KEGG_RENAL_CELL_CARCINOMA		70	0.421006	1.34656	0.166667	0.4951	0.824	6386	tags=31%, list=12%, signal=36%
KEGG_RIBOSOME	KEGG_RIBOSOME	Details ...	88	0.654062	1.49954	0.169625	0.568657	0.685	11951	tags=64%, list=22%, signal=82%
KEGG_NITROGEN_METABOLISM	KEGG_NITROGEN_METABOLISM		23	0.38419	1.24877	0.172297	0.505814	0.912	9354	tags=35%, list=17%, signal=42%
KEGG_ERBB_SIGNALING_PATHWAY	KEGG_ERBB_SIGNALING_PATHWAY		87	0.377357	1.30749	0.172986	0.488377	0.854	11395	tags=40%, list=21%, signal=51%
KEGG_INSULIN_SIGNALING_PATHWAY	KEGG_INSULIN_SIGNALING_PATHWAY		137	0.353751	1.29988	0.182628	0.491647	0.863	9326	tags=34%, list=17%, signal=41%
KEGG_SPLICEOSOME	KEGG_SPLICEOSOME		127	0.506374	1.41448	0.211694	0.553238	0.771	14615	tags=57%, list=27%, signal=78%
KEGG_DRUG_METABOLISM_CYTOCHROME_P450	KEGG_DRUG_METABOLISM_CYTOCHROME_P450		71	0.339209	1.24903	0.212766	0.51577	0.912	7364	tags=28%, list=14%, signal=33%
KEGG_VIBRIO_CHOLERAE_INFECTION	KEGG_VIBRIO_CHOLERAE_INFECTION		54	0.378962	1.23769	0.215347	0.485652	0.917	10641	tags=37%, list=20%, signal=46%
KEGG_GLYCINE_SERINE_AND_THREONINE_METABOLISM	KEGG_GLYCINE_SERINE_AND_THREONINE_METABOLISM		31	0.38965	1.22148	0.218023	0.483891	0.926	9792	tags=35%, list=18%, signal=43%
KEGG_GNRH_SIGNALING_PATHWAY	KEGG_GNRH_SIGNALING_PATHWAY		101	0.335348	1.2369	0.228205	0.468965	0.918	4716	tags=22%, list=9%, signal=24%
KEGG_AMINO_SUGAR_AND_NUCLEOTIDE_SUGAR_METABOLISM	KEGG_AMINO_SUGAR_AND_NUCLEOTIDE_SUGAR_METABOLISM		44	0.426227	1.26655	0.228438	0.495202	0.899	7257	tags=34%, list=13%, signal=39%
KEGG_ACUTE_MYELOID_LEUKEMIA	KEGG_ACUTE_MYELOID_LEUKEMIA		57	0.382267	1.23875	0.23445	0.493411	0.917	10726	tags=39%, list=20%, signal=48%
KEGG_RIG_I_LIKE_RECEPTOR_SIGNALING_PATHWAY	KEGG_RIG_I_LIKE_RECEPTOR_SIGNALING_PATHWAY		71	0.345939	1.24343	0.236443	0.50493	0.917	15527	tags=48%, list=29%, signal=67%
KEGG_ALZHEIMERS_DISEASE	KEGG_ALZHEIMERS_DISEASE		160	0.370455	1.276	0.239819	0.498664	0.889	5831	tags=26%, list=11%, signal=29%
KEGG_WNT_SIGNALING_PATHWAY	KEGG_WNT_SIGNALING_PATHWAY		151	0.30893	1.19027	0.24812	0.474078	0.934	6835	tags=25%, list=13%, signal=29%
KEGG_HUNTINGTONS_DISEASE	KEGG_HUNTINGTONS_DISEASE		176	0.381357	1.27147	0.25	0.496062	0.892	9492	tags=34%, list=18%, signal=41%
KEGG_T_CELL_RECEPTOR_SIGNALING_PATHWAY	KEGG_T_CELL_RECEPTOR_SIGNALING_PATHWAY		108	0.375546	1.23896	0.251748	0.50283	0.917	7906	tags=28%, list=15%, signal=32%
KEGG_PANCREATIC_CANCER	KEGG_PANCREATIC_CANCER		70	0.37169	1.21476	0.259259	0.485895	0.927	4952	tags=26%, list=9%, signal=28%
KEGG_MAPK_SIGNALING_PATHWAY	KEGG_MAPK_SIGNALING_PATHWAY		267	0.288252	1.16878	0.260309	0.484911	0.945	6877	tags=23%, list=13%, signal=26%
KEGG_ENDOMETRIAL_CANCER	KEGG_ENDOMETRIAL_CANCER		52	0.376458	1.21416	0.262115	0.47861	0.928	4952	tags=23%, list=9%, signal=25%
KEGG_REGULATION_OF_ACTIN_CYTOSKELETON	KEGG_REGULATION_OF_ACTIN_CYTOSKELETON		213	0.298865	1.15658	0.264059	0.496825	0.949	6386	tags=23%, list=12%, signal=26%
KEGG_UBIQUITIN_MEDIATED_PROTEOLYSIS	KEGG_UBIQUITIN_MEDIATED_PROTEOLYSIS		135	0.411422	1.27719	0.266807	0.508289	0.887	14868	tags=47%, list=28%, signal=65%
KEGG_GLYOXYLATE_AND_DICARBOXYLATE_METABOLISM	KEGG_GLYOXYLATE_AND_DICARBOXYLATE_METABOLISM		16	0.465692	1.2009	0.268456	0.473316	0.929	6975	tags=38%, list=13%, signal=43%
KEGG_BUTANOATE_METABOLISM	KEGG_BUTANOATE_METABOLISM		34	0.3954	1.20214	0.268657	0.479398	0.928	5955	tags=29%, list=11%, signal=33%
KEGG_SELENOAMINO_ACID_METABOLISM	KEGG_SELENOAMINO_ACID_METABOLISM		26	0.433104	1.19513	0.278912	0.47404	0.932	10003	tags=35%, list=19%, signal=42%
KEGG_PARKINSONS_DISEASE	KEGG_PARKINSONS_DISEASE		117	0.412723	1.23725	0.282222	0.477264	0.918	7455	tags=28%, list=14%, signal=33%
KEGG_PROXIMAL_TUBULE_BICARBONATE_RECLAMATION	KEGG_PROXIMAL_TUBULE_BICARBONATE_RECLAMATION		23	0.343965	1.13087	0.290735	0.527442	0.956	11316	tags=39%, list=21%, signal=50%
KEGG_SPHINGOLIPID_METABOLISM	KEGG_SPHINGOLIPID_METABOLISM		39	0.390552	1.17228	0.296569	0.487494	0.944	14212	tags=44%, list=26%, signal=59%
KEGG_CITRATE_CYCLE_TCA_CYCLE	KEGG_CITRATE_CYCLE_TCA_CYCLE		31	0.483121	1.20631	0.312634	0.481559	0.928	14458	tags=58%, list=27%, signal=79%
KEGG_OXIDATIVE_PHOSPHORYLATION	KEGG_OXIDATIVE_PHOSPHORYLATION		119	0.394348	1.18149	0.321814	0.480505	0.941	13918	tags=44%, list=26%, signal=59%
KEGG_METABOLISM_OF_XENOBIOTICS_BY_CYTOCHROME_P450	KEGG_METABOLISM_OF_XENOBIOTICS_BY_CYTOCHROME_P450		69	0.299859	1.07432	0.326019	0.547696	0.966	11597	tags=36%, list=22%, signal=46%
KEGG_FC_GAMMA_R_MEDIATED_PHAGOCYTOSIS	KEGG_FC_GAMMA_R_MEDIATED_PHAGOCYTOSIS		96	0.335753	1.12135	0.329493	0.535009	0.958	10705	tags=36%, list=20%, signal=45%
KEGG_PATHWAYS_IN_CANCER	KEGG_PATHWAYS_IN_CANCER		325	0.275207	1.0759	0.335013	0.552824	0.966	6078	tags=19%, list=11%, signal=22%
KEGG_FC_EPSILON_RI_SIGNALING_PATHWAY	KEGG_FC_EPSILON_RI_SIGNALING_PATHWAY		79	0.30057	1.09986	0.33813	0.544312	0.959	8043	tags=28%, list=15%, signal=33%
KEGG_ASCORBATE_AND_ALDARATE_METABOLISM	KEGG_ASCORBATE_AND_ALDARATE_METABOLISM		25	0.382942	1.11786	0.351124	0.532298	0.958	11597	tags=44%, list=22%, signal=56%
KEGG_GAP_JUNCTION	KEGG_GAP_JUNCTION		90	0.27617	1.05729	0.360434	0.553729	0.972	10805	tags=29%, list=20%, signal=36%
KEGG_PYRUVATE_METABOLISM	KEGG_PYRUVATE_METABOLISM		40	0.34248	1.0724	0.363844	0.543125	0.966	12135	tags=35%, list=23%, signal=45%
KEGG_NOTCH_SIGNALING_PATHWAY	KEGG_NOTCH_SIGNALING_PATHWAY		47	0.343489	1.10394	0.366228	0.545941	0.959	9848	tags=34%, list=18%, signal=42%
KEGG_COLORECTAL_CANCER	KEGG_COLORECTAL_CANCER		62	0.328407	1.07822	0.373272	0.556819	0.966	4952	tags=24%, list=9%, signal=27%
KEGG_B_CELL_RECEPTOR_SIGNALING_PATHWAY	KEGG_B_CELL_RECEPTOR_SIGNALING_PATHWAY		75	0.340212	1.08978	0.374707	0.553331	0.96	5228	tags=25%, list=10%, signal=28%
KEGG_GLIOMA	KEGG_GLIOMA		65	0.299042	1.05382	0.383292	0.544939	0.973	4952	tags=22%, list=9%, signal=24%
KEGG_BASAL_CELL_CARCINOMA	KEGG_BASAL_CELL_CARCINOMA		55	0.290691	1.05822	0.395028	0.55942	0.972	4945	tags=20%, list=9%, signal=22%
KEGG_LONG_TERM_DEPRESSION	KEGG_LONG_TERM_DEPRESSION		70	0.270791	1.04028	0.406915	0.552181	0.975	4952	tags=20%, list=9%, signal=22%
KEGG_THYROID_CANCER	KEGG_THYROID_CANCER		29	0.349744	1.05453	0.407002	0.550755	0.973	4952	tags=21%, list=9%, signal=23%
KEGG_PENTOSE_AND_GLUCURONATE_INTERCONVERSIONS	KEGG_PENTOSE_AND_GLUCURONATE_INTERCONVERSIONS		28	0.343345	1.03366	0.409605	0.549016	0.975	11881	tags=43%, list=22%, signal=55%
KEGG_PROTEASOME	KEGG_PROTEASOME		46	0.406722	1.08157	0.417204	0.557974	0.963	10298	tags=35%, list=19%, signal=43%
KEGG_RNA_DEGRADATION	KEGG_RNA_DEGRADATION		59	0.373164	1.04879	0.419422	0.546212	0.973	13224	tags=46%, list=25%, signal=61%
KEGG_OOCYTE_MEIOSIS	KEGG_OOCYTE_MEIOSIS		113	0.300665	1.0348	0.422535	0.55377	0.975	6863	tags=24%, list=13%, signal=27%
KEGG_LEUKOCYTE_TRANSENDOTHELIAL_MIGRATION	KEGG_LEUKOCYTE_TRANSENDOTHELIAL_MIGRATION		115	0.284564	1.01303	0.422785	0.56755	0.976	10634	tags=31%, list=20%, signal=39%
KEGG_PROGESTERONE_MEDIATED_OOCYTE_MATURATION	KEGG_PROGESTERONE_MEDIATED_OOCYTE_MATURATION		85	0.289802	0.997468	0.429234	0.572112	0.979	8043	tags=26%, list=15%, signal=30%
KEGG_DRUG_METABOLISM_OTHER_ENZYMES	KEGG_DRUG_METABOLISM_OTHER_ENZYMES		51	0.290196	1.00486	0.432024	0.573174	0.977	13188	tags=35%, list=24%, signal=47%
KEGG_O_GLYCAN_BIOSYNTHESIS	KEGG_O_GLYCAN_BIOSYNTHESIS		30	0.306371	0.992923	0.455526	0.572751	0.979	13112	tags=47%, list=24%, signal=62%
KEGG_LYSINE_DEGRADATION	KEGG_LYSINE_DEGRADATION		44	0.35984	1.00009	0.458874	0.57423	0.979	12579	tags=36%, list=23%, signal=47%
KEGG_NUCLEOTIDE_EXCISION_REPAIR	KEGG_NUCLEOTIDE_EXCISION_REPAIR		44	0.377187	1.02158	0.466387	0.560967	0.975	12223	tags=41%, list=23%, signal=53%
KEGG_ADIPOCYTOKINE_SIGNALING_PATHWAY	KEGG_ADIPOCYTOKINE_SIGNALING_PATHWAY		67	0.263476	0.953079	0.479319	0.590343	0.981	10670	tags=28%, list=20%, signal=35%
KEGG_MATURITY_ONSET_DIABETES_OF_THE_YOUNG	KEGG_MATURITY_ONSET_DIABETES_OF_THE_YOUNG		25	0.300601	0.967514	0.480447	0.59872	0.98	5693	tags=24%, list=11%, signal=27%
KEGG_PYRIMIDINE_METABOLISM	KEGG_PYRIMIDINE_METABOLISM		98	0.305347	0.982293	0.482916	0.581891	0.979	10944	tags=35%, list=20%, signal=43%
KEGG_TOLL_LIKE_RECEPTOR_SIGNALING_PATHWAY	KEGG_TOLL_LIKE_RECEPTOR_SIGNALING_PATHWAY		102	0.271084	0.945669	0.486364	0.589908	0.981	3670	tags=16%, list=7%, signal=17%
KEGG_INOSITOL_PHOSPHATE_METABOLISM	KEGG_INOSITOL_PHOSPHATE_METABOLISM		54	0.31771	0.959043	0.486842	0.593974	0.981	9835	tags=33%, list=18%, signal=41%
KEGG_CHRONIC_MYELOID_LEUKEMIA	KEGG_CHRONIC_MYELOID_LEUKEMIA		73	0.311314	0.965416	0.492341	0.589971	0.98	9381	tags=30%, list=17%, signal=36%
KEGG_PEROXISOME	KEGG_PEROXISOME		78	0.314083	0.959037	0.501177	0.587909	0.981	10593	tags=32%, list=20%, signal=40%
KEGG_GLYCOSAMINOGLYCAN_BIOSYNTHESIS_HEPARAN_SULFATE	KEGG_GLYCOSAMINOGLYCAN_BIOSYNTHESIS_HEPARAN_SULFATE		26	0.300678	0.966627	0.50134	0.594009	0.98	8090	tags=27%, list=15%, signal=32%
KEGG_NOD_LIKE_RECEPTOR_SIGNALING_PATHWAY	KEGG_NOD_LIKE_RECEPTOR_SIGNALING_PATHWAY		62	0.276715	0.940492	0.502427	0.591832	0.981	5923	tags=19%, list=11%, signal=22%
KEGG_GLUTATHIONE_METABOLISM	KEGG_GLUTATHIONE_METABOLISM		49	0.272612	0.947153	0.515306	0.593359	0.981	10613	tags=31%, list=20%, signal=38%
KEGG_BLADDER_CANCER	KEGG_BLADDER_CANCER		42	0.278609	0.928342	0.525943	0.585604	0.981	5430	tags=19%, list=10%, signal=21%
KEGG_ARRHYTHMOGENIC_RIGHT_VENTRICULAR_CARDIOMYOPATHY_ARVC	KEGG_ARRHYTHMOGENIC_RIGHT_VENTRICULAR_CARDIOMYOPATHY_ARVC		74	0.258941	0.934102	0.530769	0.594219	0.981	6064	tags=19%, list=11%, signal=21%
KEGG_VEGF_SIGNALING_PATHWAY	KEGG_VEGF_SIGNALING_PATHWAY		76	0.259308	0.931067	0.53528	0.592905	0.981	3625	tags=17%, list=7%, signal=18%
KEGG_PROSTATE_CANCER	KEGG_PROSTATE_CANCER		89	0.268742	0.928344	0.536817	0.591235	0.981	7888	tags=21%, list=15%, signal=25%
KEGG_AMINOACYL_TRNA_BIOSYNTHESIS	KEGG_AMINOACYL_TRNA_BIOSYNTHESIS		41	0.37743	0.90565	0.539916	0.609096	0.981	9477	tags=32%, list=18%, signal=38%
KEGG_NON_SMALL_CELL_LUNG_CANCER	KEGG_NON_SMALL_CELL_LUNG_CANCER		54	0.280247	0.917615	0.550459	0.595772	0.981	11572	tags=33%, list=21%, signal=42%
KEGG_PHOSPHATIDYLINOSITOL_SIGNALING_SYSTEM	KEGG_PHOSPHATIDYLINOSITOL_SIGNALING_SYSTEM		76	0.282106	0.900775	0.561364	0.609717	0.981	10805	tags=34%, list=20%, signal=43%
KEGG_RNA_POLYMERASE	KEGG_RNA_POLYMERASE		29	0.308387	0.859621	0.590618	0.638086	0.983	7028	tags=31%, list=13%, signal=36%
KEGG_MTOR_SIGNALING_PATHWAY	KEGG_MTOR_SIGNALING_PATHWAY		52	0.279317	0.87481	0.598131	0.632381	0.983	9632	tags=33%, list=18%, signal=40%
KEGG_PPAR_SIGNALING_PATHWAY	KEGG_PPAR_SIGNALING_PATHWAY		69	0.23764	0.896441	0.600583	0.609654	0.981	9646	tags=22%, list=18%, signal=26%
KEGG_TYPE_II_DIABETES_MELLITUS	KEGG_TYPE_II_DIABETES_MELLITUS		47	0.237229	0.880425	0.604905	0.628544	0.982	8043	tags=28%, list=15%, signal=32%
KEGG_BASE_EXCISION_REPAIR	KEGG_BASE_EXCISION_REPAIR		35	0.322409	0.861431	0.610638	0.64072	0.983	10600	tags=31%, list=20%, signal=39%
KEGG_DNA_REPLICATION	KEGG_DNA_REPLICATION		36	0.346882	0.829267	0.618661	0.679404	0.986	12023	tags=33%, list=22%, signal=43%
KEGG_GLYCEROPHOSPHOLIPID_METABOLISM	KEGG_GLYCEROPHOSPHOLIPID_METABOLISM		77	0.248931	0.86985	0.62963	0.634117	0.983	10549	tags=32%, list=20%, signal=40%
KEGG_MISMATCH_REPAIR	KEGG_MISMATCH_REPAIR		23	0.339734	0.816455	0.635052	0.688025	0.988	14279	tags=39%, list=27%, signal=53%
KEGG_CELL_CYCLE	KEGG_CELL_CYCLE		125	0.264269	0.811062	0.63895	0.690158	0.988	13215	tags=36%, list=25%, signal=48%
KEGG_VIRAL_MYOCARDITIS	KEGG_VIRAL_MYOCARDITIS		68	0.249867	0.799954	0.639098	0.695547	0.988	4001	tags=15%, list=7%, signal=16%
KEGG_CHEMOKINE_SIGNALING_PATHWAY	KEGG_CHEMOKINE_SIGNALING_PATHWAY		188	0.213772	0.79343	0.666667	0.699931	0.988	11281	tags=26%, list=21%, signal=33%
KEGG_RIBOFLAVIN_METABOLISM	KEGG_RIBOFLAVIN_METABOLISM		16	0.269794	0.806574	0.688222	0.690803	0.988	9668	tags=31%, list=18%, signal=38%
KEGG_SMALL_CELL_LUNG_CANCER	KEGG_SMALL_CELL_LUNG_CANCER		84	0.235754	0.776963	0.709302	0.720175	0.989	14868	tags=37%, list=28%, signal=51%
KEGG_MELANOMA	KEGG_MELANOMA		71	0.214238	0.826211	0.713499	0.678154	0.987	4952	tags=15%, list=9%, signal=17%
KEGG_TERPENOID_BACKBONE_BIOSYNTHESIS	KEGG_TERPENOID_BACKBONE_BIOSYNTHESIS		15	0.325038	0.745466	0.716418	0.762767	0.991	14021	tags=40%, list=26%, signal=54%
KEGG_FOCAL_ADHESION	KEGG_FOCAL_ADHESION		199	0.211208	0.730807	0.74092	0.762243	0.993	6386	tags=18%, list=12%, signal=20%
KEGG_NATURAL_KILLER_CELL_MEDIATED_CYTOTOXICITY	KEGG_NATURAL_KILLER_CELL_MEDIATED_CYTOTOXICITY		132	0.205517	0.721523	0.753659	0.763986	0.993	5228	tags=16%, list=10%, signal=18%
KEGG_SNARE_INTERACTIONS_IN_VESICULAR_TRANSPORT	KEGG_SNARE_INTERACTIONS_IN_VESICULAR_TRANSPORT		38	0.247365	0.736995	0.773987	0.764082	0.993	14284	tags=39%, list=27%, signal=54%
KEGG_TYPE_I_DIABETES_MELLITUS	KEGG_TYPE_I_DIABETES_MELLITUS		41	0.228714	0.611289	0.77635	0.882266	0.997	3511	tags=12%, list=7%, signal=13%
KEGG_DORSO_VENTRAL_AXIS_FORMATION	KEGG_DORSO_VENTRAL_AXIS_FORMATION		24	0.235703	0.728234	0.782927	0.759968	0.993	9728	tags=29%, list=18%, signal=36%
KEGG_AMYOTROPHIC_LATERAL_SCLEROSIS_ALS	KEGG_AMYOTROPHIC_LATERAL_SCLEROSIS_ALS		53	0.209133	0.743832	0.79562	0.75939	0.992	11370	tags=28%, list=21%, signal=36%
KEGG_LEISHMANIA_INFECTION	KEGG_LEISHMANIA_INFECTION		70	0.215215	0.622923	0.818396	0.880536	0.997	2798	tags=13%, list=5%, signal=14%
KEGG_HOMOLOGOUS_RECOMBINATION	KEGG_HOMOLOGOUS_RECOMBINATION		28	0.24344	0.622972	0.818763	0.88721	0.997	11793	tags=29%, list=22%, signal=37%
KEGG_GLYCOSAMINOGLYCAN_DEGRADATION	KEGG_GLYCOSAMINOGLYCAN_DEGRADATION		21	0.231969	0.6608	0.820455	0.845104	0.996	7478	tags=19%, list=14%, signal=22%
KEGG_N_GLYCAN_BIOSYNTHESIS	KEGG_N_GLYCAN_BIOSYNTHESIS		46	0.209165	0.570909	0.873638	0.909963	0.997	13498	tags=33%, list=25%, signal=43%
KEGG_OLFACTORY_TRANSDUCTION	KEGG_OLFACTORY_TRANSDUCTION		375	0.160431	0.735415	0.878125	0.760586	0.993	12072	tags=26%, list=22%, signal=33%
KEGG_BASAL_TRANSCRIPTION_FACTORS	KEGG_BASAL_TRANSCRIPTION_FACTORS		35	0.215261	0.608031	0.879121	0.879571	0.997	10437	tags=29%, list=19%, signal=35%
KEGG_JAK_STAT_SIGNALING_PATHWAY	KEGG_JAK_STAT_SIGNALING_PATHWAY		155	0.168567	0.616589	0.880779	0.881941	0.997	11168	tags=23%, list=21%, signal=29%
KEGG_LYSOSOME	KEGG_LYSOSOME		121	0.16696	0.542797	0.948315	0.921879	0.998	8052	tags=17%, list=15%, signal=19%
KEGG_PANTOTHENATE_AND_COA_BIOSYNTHESIS	KEGG_PANTOTHENATE_AND_COA_BIOSYNTHESIS		16	0.181786	0.543072	0.963325	0.928165	0.998	11781	tags=31%, list=22%, signal=40%

## Sheet: Blad3
NAME	GS<br> follow link to MSigDB	GS DETAILS	SIZE	ES	NES	NOM p-val	FDR q-val	FWER p-val	RANK AT MAX	LEADING EDGE
BIOCARTA_GCR_PATHWAY	BIOCARTA_GCR_PATHWAY	Details ...	17	0.666171	1.93528	0	0.12183	0.053	4027	tags=41%, list=7%, signal=44%
BIOCARTA_MCALPAIN_PATHWAY	BIOCARTA_MCALPAIN_PATHWAY	Details ...	19	0.586301	1.68321	0.0161663	0.511887	0.312	7048	tags=42%, list=13%, signal=48%
BIOCARTA_RAS_PATHWAY	BIOCARTA_RAS_PATHWAY	Details ...	22	0.718632	1.72645	0.0232068	0.718203	0.257	3547	tags=45%, list=7%, signal=49%
BIOCARTA_HER2_PATHWAY	BIOCARTA_HER2_PATHWAY	Details ...	23	0.578098	1.69729	0.0299539	0.61018	0.296	4716	tags=39%, list=9%, signal=43%
BIOCARTA_IGF1R_PATHWAY	BIOCARTA_IGF1R_PATHWAY	Details ...	23	0.57945	1.60619	0.0323974	0.596548	0.429	5144	tags=39%, list=10%, signal=43%
BIOCARTA_BARRESTIN_SRC_PATHWAY	BIOCARTA_BARRESTIN_SRC_PATHWAY	Details ...	17	0.520866	1.58357	0.0362319	0.586193	0.465	2871	tags=29%, list=5%, signal=31%
BIOCARTA_CK1_PATHWAY	BIOCARTA_CK1_PATHWAY	Details ...	16	0.505152	1.51416	0.0386473	0.410382	0.569	4896	tags=38%, list=9%, signal=41%
BIOCARTA_MAL_PATHWAY	BIOCARTA_MAL_PATHWAY	Details ...	19	0.656092	1.65189	0.0512295	0.513413	0.348	2886	tags=47%, list=5%, signal=50%
BIOCARTA_MPR_PATHWAY	BIOCARTA_MPR_PATHWAY	Details ...	21	0.512811	1.49603	0.055814	0.402039	0.591	7484	tags=38%, list=14%, signal=44%
BIOCARTA_IL1R_PATHWAY	BIOCARTA_IL1R_PATHWAY	Details ...	31	0.54041	1.53834	0.0584112	0.415592	0.535	5749	tags=39%, list=11%, signal=43%
BIOCARTA_CDMAC_PATHWAY	BIOCARTA_CDMAC_PATHWAY	Details ...	16	0.592899	1.53408	0.059448	0.395533	0.541	2871	tags=44%, list=5%, signal=46%
BIOCARTA_VDR_PATHWAY	BIOCARTA_VDR_PATHWAY	Details ...	24	0.654226	1.5765	0.0611814	0.478414	0.475	8959	tags=58%, list=17%, signal=70%
BIOCARTA_ERK_PATHWAY	BIOCARTA_ERK_PATHWAY	Details ...	27	0.537861	1.57701	0.063786	0.536223	0.475	4716	tags=33%, list=9%, signal=37%
BIOCARTA_PPARA_PATHWAY	BIOCARTA_PPARA_PATHWAY	Details ...	52	0.473815	1.5654	0.0668151	0.420157	0.488	10726	tags=42%, list=20%, signal=53%
BIOCARTA_INTEGRIN_PATHWAY	BIOCARTA_INTEGRIN_PATHWAY	Details ...	34	0.537522	1.57195	0.0711382	0.443953	0.48	8043	tags=53%, list=15%, signal=62%
BIOCARTA_MTA3_PATHWAY	BIOCARTA_MTA3_PATHWAY	Details ...	18	0.528313	1.48679	0.0731071	0.401776	0.6	10288	tags=44%, list=19%, signal=55%
BIOCARTA_AT1R_PATHWAY	BIOCARTA_AT1R_PATHWAY	Details ...	27	0.543943	1.53905	0.081761	0.44883	0.535	4716	tags=33%, list=9%, signal=37%
BIOCARTA_FMLP_PATHWAY	BIOCARTA_FMLP_PATHWAY		34	0.530274	1.46709	0.0930233	0.378869	0.617	2871	tags=32%, list=5%, signal=34%
BIOCARTA_STRESS_PATHWAY	BIOCARTA_STRESS_PATHWAY	Details ...	24	0.572781	1.47204	0.0949495	0.38928	0.613	8447	tags=46%, list=16%, signal=54%
BIOCARTA_CERAMIDE_PATHWAY	BIOCARTA_CERAMIDE_PATHWAY		21	0.586503	1.44565	0.107943	0.33928	0.633	3670	tags=38%, list=7%, signal=41%
BIOCARTA_MET_PATHWAY	BIOCARTA_MET_PATHWAY	Details ...	33	0.535857	1.50716	0.115079	0.403058	0.577	9980	tags=45%, list=19%, signal=56%
BIOCARTA_HIF_PATHWAY	BIOCARTA_HIF_PATHWAY		15	0.537684	1.40377	0.115632	0.358987	0.675	7405	tags=53%, list=14%, signal=62%
BIOCARTA_SHH_PATHWAY	BIOCARTA_SHH_PATHWAY		16	0.507491	1.38093	0.11674	0.351978	0.7	2524	tags=25%, list=5%, signal=26%
BIOCARTA_PYK2_PATHWAY	BIOCARTA_PYK2_PATHWAY	Details ...	27	0.572074	1.47627	0.118	0.401312	0.608	4716	tags=41%, list=9%, signal=45%
BIOCARTA_ECM_PATHWAY	BIOCARTA_ECM_PATHWAY		19	0.58193	1.45348	0.118712	0.354824	0.629	2871	tags=32%, list=5%, signal=33%
BIOCARTA_PTDINS_PATHWAY	BIOCARTA_PTDINS_PATHWAY		23	0.584067	1.45485	0.124736	0.368692	0.629	7127	tags=48%, list=13%, signal=55%
BIOCARTA_NFKB_PATHWAY	BIOCARTA_NFKB_PATHWAY		21	0.579833	1.46609	0.125	0.363692	0.617	5904	tags=43%, list=11%, signal=48%
BIOCARTA_AKT_PATHWAY	BIOCARTA_AKT_PATHWAY		22	0.519768	1.41638	0.132075	0.378554	0.663	14269	tags=50%, list=27%, signal=68%
BIOCARTA_GLEEVEC_PATHWAY	BIOCARTA_GLEEVEC_PATHWAY		23	0.540108	1.44939	0.13278	0.346809	0.633	10726	tags=52%, list=20%, signal=65%
BIOCARTA_KERATINOCYTE_PATHWAY	BIOCARTA_KERATINOCYTE_PATHWAY		46	0.477024	1.38247	0.142202	0.359986	0.699	8447	tags=41%, list=16%, signal=49%
BIOCARTA_MAPK_PATHWAY	BIOCARTA_MAPK_PATHWAY		81	0.475026	1.41326	0.148073	0.371261	0.67	8043	tags=37%, list=15%, signal=43%
BIOCARTA_TNFR2_PATHWAY	BIOCARTA_TNFR2_PATHWAY		17	0.579581	1.40068	0.150515	0.352503	0.678	5904	tags=41%, list=11%, signal=46%
BIOCARTA_NTHI_PATHWAY	BIOCARTA_NTHI_PATHWAY		23	0.551995	1.40631	0.153361	0.367682	0.673	5749	tags=35%, list=11%, signal=39%
BIOCARTA_RACCYCD_PATHWAY	BIOCARTA_RACCYCD_PATHWAY		26	0.529857	1.37278	0.16122	0.355731	0.707	2358	tags=27%, list=4%, signal=28%
BIOCARTA_NDKDYNAMIN_PATHWAY	BIOCARTA_NDKDYNAMIN_PATHWAY		17	0.537254	1.33196	0.163934	0.38675	0.737	2611	tags=29%, list=5%, signal=31%
BIOCARTA_PDZS_PATHWAY	BIOCARTA_PDZS_PATHWAY		18	0.425789	1.27937	0.169811	0.389117	0.774	9424	tags=33%, list=18%, signal=40%
BIOCARTA_NOS1_PATHWAY	BIOCARTA_NOS1_PATHWAY		21	0.403386	1.28104	0.17037	0.395411	0.773	2937	tags=24%, list=5%, signal=25%
BIOCARTA_CD40_PATHWAY	BIOCARTA_CD40_PATHWAY		15	0.553852	1.31857	0.185996	0.395636	0.745	15118	tags=60%, list=28%, signal=83%
BIOCARTA_RAC1_PATHWAY	BIOCARTA_RAC1_PATHWAY		21	0.477693	1.29922	0.187783	0.38715	0.761	9886	tags=38%, list=18%, signal=47%
BIOCARTA_ARAP_PATHWAY	BIOCARTA_ARAP_PATHWAY		17	0.542459	1.34308	0.189362	0.390746	0.725	9116	tags=47%, list=17%, signal=57%
BIOCARTA_RELA_PATHWAY	BIOCARTA_RELA_PATHWAY		15	0.609946	1.39087	0.194779	0.359315	0.691	3670	tags=40%, list=7%, signal=43%
BIOCARTA_HCMV_PATHWAY	BIOCARTA_HCMV_PATHWAY		17	0.574715	1.33294	0.202479	0.395931	0.736	2871	tags=35%, list=5%, signal=37%
BIOCARTA_LIS1_PATHWAY	BIOCARTA_LIS1_PATHWAY		19	0.455094	1.2745	0.207373	0.387327	0.779	4896	tags=42%, list=9%, signal=46%
BIOCARTA_ARENRF2_PATHWAY	BIOCARTA_ARENRF2_PATHWAY		20	0.476637	1.29199	0.208617	0.388603	0.768	9096	tags=45%, list=17%, signal=54%
BIOCARTA_GSK3_PATHWAY	BIOCARTA_GSK3_PATHWAY		20	0.465826	1.30657	0.209957	0.39397	0.755	3439	tags=30%, list=6%, signal=32%
BIOCARTA_NO1_PATHWAY	BIOCARTA_NO1_PATHWAY		28	0.389309	1.23864	0.210654	0.367972	0.81	4667	tags=25%, list=9%, signal=27%
BIOCARTA_DEATH_PATHWAY	BIOCARTA_DEATH_PATHWAY		29	0.508496	1.31521	0.218615	0.390784	0.749	16346	tags=66%, list=30%, signal=94%
BIOCARTA_IGF1_PATHWAY	BIOCARTA_IGF1_PATHWAY		21	0.490397	1.30137	0.223404	0.392504	0.757	9861	tags=52%, list=18%, signal=64%
BIOCARTA_CARM_ER_PATHWAY	BIOCARTA_CARM_ER_PATHWAY		26	0.42842	1.25163	0.229474	0.365832	0.803	4130	tags=27%, list=8%, signal=29%
BIOCARTA_CREB_PATHWAY	BIOCARTA_CREB_PATHWAY		22	0.459481	1.25632	0.230263	0.366691	0.797	9309	tags=36%, list=17%, signal=44%
BIOCARTA_BIOPEPTIDES_PATHWAY	BIOCARTA_BIOPEPTIDES_PATHWAY		29	0.440695	1.26594	0.230769	0.390472	0.789	10670	tags=45%, list=20%, signal=56%
BIOCARTA_41BB_PATHWAY	BIOCARTA_41BB_PATHWAY		18	0.491375	1.25073	0.248927	0.360102	0.803	2003	tags=22%, list=4%, signal=23%
BIOCARTA_SPPA_PATHWAY	BIOCARTA_SPPA_PATHWAY		16	0.413987	1.18962	0.251064	0.403726	0.841	2871	tags=25%, list=5%, signal=26%
BIOCARTA_TOLL_PATHWAY	BIOCARTA_TOLL_PATHWAY		25	0.482004	1.26156	0.251073	0.381973	0.794	10257	tags=40%, list=19%, signal=49%
BIOCARTA_EFP_PATHWAY	BIOCARTA_EFP_PATHWAY		16	0.468457	1.21768	0.252796	0.380899	0.823	12755	tags=56%, list=24%, signal=74%
BIOCARTA_TNFR1_PATHWAY	BIOCARTA_TNFR1_PATHWAY		29	0.486942	1.2571	0.25498	0.372939	0.797	12890	tags=52%, list=24%, signal=68%
BIOCARTA_FAS_PATHWAY	BIOCARTA_FAS_PATHWAY		30	0.469795	1.26548	0.25523	0.383096	0.789	15118	tags=53%, list=28%, signal=74%
BIOCARTA_CCR3_PATHWAY	BIOCARTA_CCR3_PATHWAY		19	0.415148	1.18148	0.25641	0.393702	0.843	2871	tags=26%, list=5%, signal=28%
BIOCARTA_P38MAPK_PATHWAY	BIOCARTA_P38MAPK_PATHWAY		36	0.41694	1.18885	0.266807	0.397864	0.841	13700	tags=47%, list=25%, signal=63%
BIOCARTA_MTOR_PATHWAY	BIOCARTA_MTOR_PATHWAY		22	0.484337	1.26046	0.270378	0.375929	0.794	9309	tags=36%, list=17%, signal=44%
BIOCARTA_PDGF_PATHWAY	BIOCARTA_PDGF_PATHWAY		28	0.449483	1.23046	0.270613	0.37231	0.815	9861	tags=39%, list=18%, signal=48%
BIOCARTA_PML_PATHWAY	BIOCARTA_PML_PATHWAY		17	0.425216	1.16807	0.288546	0.387472	0.85	10209	tags=47%, list=19%, signal=58%
BIOCARTA_TALL1_PATHWAY	BIOCARTA_TALL1_PATHWAY		15	0.464085	1.17025	0.291845	0.390707	0.849	8043	tags=47%, list=15%, signal=55%
BIOCARTA_GPCR_PATHWAY	BIOCARTA_GPCR_PATHWAY		30	0.407864	1.16339	0.292111	0.387759	0.854	2871	tags=23%, list=5%, signal=25%
BIOCARTA_HIVNEF_PATHWAY	BIOCARTA_HIVNEF_PATHWAY		56	0.416651	1.20168	0.293501	0.394309	0.836	9390	tags=39%, list=17%, signal=48%
BIOCARTA_INSULIN_PATHWAY	BIOCARTA_INSULIN_PATHWAY		21	0.446712	1.18421	0.295218	0.396713	0.841	9861	tags=48%, list=18%, signal=58%
BIOCARTA_NFAT_PATHWAY	BIOCARTA_NFAT_PATHWAY		51	0.344353	1.1739	0.296214	0.39203	0.847	2871	tags=20%, list=5%, signal=21%
BIOCARTA_TPO_PATHWAY	BIOCARTA_TPO_PATHWAY		24	0.422959	1.15161	0.312364	0.395201	0.857	10670	tags=46%, list=20%, signal=57%
BIOCARTA_EGF_PATHWAY	BIOCARTA_EGF_PATHWAY		27	0.428186	1.17579	0.321277	0.395722	0.843	9861	tags=41%, list=18%, signal=50%
BIOCARTA_TCR_PATHWAY	BIOCARTA_TCR_PATHWAY		44	0.382373	1.1194	0.32334	0.418025	0.875	4812	tags=25%, list=9%, signal=27%
BIOCARTA_TID_PATHWAY	BIOCARTA_TID_PATHWAY		19	0.443511	1.12473	0.3379	0.422723	0.874	10670	tags=47%, list=20%, signal=59%
BIOCARTA_SPRY_PATHWAY	BIOCARTA_SPRY_PATHWAY		17	0.426593	1.12305	0.340206	0.419015	0.874	4812	tags=35%, list=9%, signal=39%
BIOCARTA_TFF_PATHWAY	BIOCARTA_TFF_PATHWAY		24	0.353776	1.07624	0.340476	0.459846	0.887	14190	tags=46%, list=26%, signal=62%
BIOCARTA_VIP_PATHWAY	BIOCARTA_VIP_PATHWAY		26	0.392601	1.08039	0.379877	0.459938	0.884	2041	tags=23%, list=4%, signal=24%
BIOCARTA_GH_PATHWAY	BIOCARTA_GH_PATHWAY		27	0.368958	1.05195	0.403974	0.481909	0.9	10670	tags=41%, list=20%, signal=51%
BIOCARTA_IL3_PATHWAY	BIOCARTA_IL3_PATHWAY		15	0.418952	1.04357	0.404762	0.479958	0.902	4716	tags=27%, list=9%, signal=29%
BIOCARTA_IL2RB_PATHWAY	BIOCARTA_IL2RB_PATHWAY		37	0.364758	1.03892	0.421397	0.479464	0.902	9381	tags=32%, list=17%, signal=39%
BIOCARTA_MITOCHONDRIA_PATHWAY	BIOCARTA_MITOCHONDRIA_PATHWAY		19	0.416583	1.06084	0.42418	0.474895	0.892	16346	tags=58%, list=30%, signal=83%
BIOCARTA_CXCR4_PATHWAY	BIOCARTA_CXCR4_PATHWAY		19	0.413314	1.0474	0.433684	0.481093	0.9	2871	tags=32%, list=5%, signal=33%
BIOCARTA_MEF2D_PATHWAY	BIOCARTA_MEF2D_PATHWAY		18	0.391227	1.0172	0.43949	0.495211	0.911	3918	tags=28%, list=7%, signal=30%
BIOCARTA_NGF_PATHWAY	BIOCARTA_NGF_PATHWAY		20	0.36276	1.01489	0.444444	0.49217	0.911	9861	tags=35%, list=18%, signal=43%
BIOCARTA_IL6_PATHWAY	BIOCARTA_IL6_PATHWAY		21	0.404014	1.03695	0.448936	0.475805	0.902	4716	tags=29%, list=9%, signal=31%
BIOCARTA_EPO_PATHWAY	BIOCARTA_EPO_PATHWAY		19	0.38098	1.00851	0.454348	0.490121	0.914	10670	tags=42%, list=20%, signal=52%
BIOCARTA_FCER1_PATHWAY	BIOCARTA_FCER1_PATHWAY		39	0.342358	0.999425	0.454348	0.489467	0.915	2871	tags=21%, list=5%, signal=22%
BIOCARTA_WNT_PATHWAY	BIOCARTA_WNT_PATHWAY		24	0.378606	1.01115	0.456842	0.4911	0.911	3439	tags=25%, list=6%, signal=27%
BIOCARTA_P53HYPOXIA_PATHWAY	BIOCARTA_P53HYPOXIA_PATHWAY		21	0.365106	0.993394	0.459397	0.490758	0.916	8043	tags=38%, list=15%, signal=45%
BIOCARTA_AGR_PATHWAY	BIOCARTA_AGR_PATHWAY		33	0.300079	0.97237	0.468085	0.502144	0.927	9452	tags=33%, list=18%, signal=40%
BIOCARTA_EIF4_PATHWAY	BIOCARTA_EIF4_PATHWAY		24	0.381998	1.0068	0.472574	0.486645	0.914	9532	tags=38%, list=18%, signal=46%
BIOCARTA_CHREBP_PATHWAY	BIOCARTA_CHREBP_PATHWAY		19	0.328254	0.986534	0.489933	0.493727	0.917	6308	tags=26%, list=12%, signal=30%
BIOCARTA_CARDIACEGF_PATHWAY	BIOCARTA_CARDIACEGF_PATHWAY		18	0.338904	0.972669	0.5125	0.507465	0.927	2003	tags=22%, list=4%, signal=23%
BIOCARTA_HDAC_PATHWAY	BIOCARTA_HDAC_PATHWAY		25	0.330858	0.945854	0.52027	0.520396	0.935	16975	tags=56%, list=32%, signal=82%
BIOCARTA_BCR_PATHWAY	BIOCARTA_BCR_PATHWAY		33	0.330278	0.950164	0.525773	0.521174	0.935	4716	tags=24%, list=9%, signal=27%
BIOCARTA_EIF_PATHWAY	BIOCARTA_EIF_PATHWAY		16	0.425812	0.960393	0.531568	0.51284	0.931	6456	tags=31%, list=12%, signal=35%
BIOCARTA_CSK_PATHWAY	BIOCARTA_CSK_PATHWAY		20	0.35964	0.919528	0.549878	0.54285	0.94	3220	tags=15%, list=6%, signal=16%
BIOCARTA_PITX2_PATHWAY	BIOCARTA_PITX2_PATHWAY		16	0.326598	0.881907	0.553846	0.569425	0.947	3612	tags=19%, list=7%, signal=20%
BIOCARTA_RHO_PATHWAY	BIOCARTA_RHO_PATHWAY		21	0.350615	0.892733	0.570213	0.568042	0.947	10705	tags=43%, list=20%, signal=53%
BIOCARTA_PROTEASOME_PATHWAY	BIOCARTA_PROTEASOME_PATHWAY		19	0.414468	0.90275	0.570896	0.561142	0.947	10298	tags=26%, list=19%, signal=33%
BIOCARTA_PGC1A_PATHWAY	BIOCARTA_PGC1A_PATHWAY		15	0.360693	0.931322	0.573626	0.534218	0.938	5227	tags=27%, list=10%, signal=30%
BIOCARTA_IL2_PATHWAY	BIOCARTA_IL2_PATHWAY		22	0.315393	0.870172	0.583851	0.574075	0.948	9861	tags=32%, list=18%, signal=39%
BIOCARTA_BCELLSURVIVAL_PATHWAY	BIOCARTA_BCELLSURVIVAL_PATHWAY		15	0.357533	0.890377	0.5842	0.565574	0.947	17620	tags=60%, list=33%, signal=89%
BIOCARTA_STATHMIN_PATHWAY	BIOCARTA_STATHMIN_PATHWAY		20	0.303711	0.877574	0.602679	0.568754	0.947	5449	tags=15%, list=10%, signal=17%
BIOCARTA_IGF1MTOR_PATHWAY	BIOCARTA_IGF1MTOR_PATHWAY		19	0.333839	0.865159	0.610766	0.575352	0.949	9701	tags=37%, list=18%, signal=45%
BIOCARTA_EDG1_PATHWAY	BIOCARTA_EDG1_PATHWAY		22	0.291801	0.848008	0.627083	0.594214	0.958	2358	tags=14%, list=4%, signal=14%
BIOCARTA_VEGF_PATHWAY	BIOCARTA_VEGF_PATHWAY		27	0.29462	0.841906	0.635789	0.597899	0.958	3556	tags=19%, list=7%, signal=20%
BIOCARTA_MCM_PATHWAY	BIOCARTA_MCM_PATHWAY		18	0.37091	0.812833	0.661885	0.635769	0.963	15804	tags=50%, list=29%, signal=71%
BIOCARTA_ATM_PATHWAY	BIOCARTA_ATM_PATHWAY		20	0.302137	0.799756	0.680672	0.636874	0.964	13987	tags=40%, list=26%, signal=54%
BIOCARTA_TEL_PATHWAY	BIOCARTA_TEL_PATHWAY		17	0.293279	0.807938	0.689805	0.636869	0.964	4685	tags=24%, list=9%, signal=26%
BIOCARTA_G1_PATHWAY	BIOCARTA_G1_PATHWAY		28	0.282964	0.805014	0.690045	0.634837	0.964	12398	tags=39%, list=23%, signal=51%
BIOCARTA_ERAD_PATHWAY	BIOCARTA_ERAD_PATHWAY		19	0.305726	0.768568	0.702213	0.668413	0.967	17104	tags=63%, list=32%, signal=93%
BIOCARTA_G2_PATHWAY	BIOCARTA_G2_PATHWAY		24	0.28593	0.754672	0.708075	0.683291	0.968	7268	tags=25%, list=14%, signal=29%
BIOCARTA_LAIR_PATHWAY	BIOCARTA_LAIR_PATHWAY		17	0.277302	0.717153	0.722628	0.712233	0.97	2798	tags=18%, list=5%, signal=19%
BIOCARTA_CASPASE_PATHWAY	BIOCARTA_CASPASE_PATHWAY		22	0.27691	0.721192	0.727273	0.711898	0.97	17166	tags=45%, list=32%, signal=67%
BIOCARTA_GRANULOCYTES_PATHWAY	BIOCARTA_GRANULOCYTES_PATHWAY		15	0.307315	0.713238	0.733491	0.712012	0.971	2798	tags=20%, list=5%, signal=21%
BIOCARTA_NUCLEARRS_PATHWAY	BIOCARTA_NUCLEARRS_PATHWAY		34	0.22383	0.798164	0.755352	0.633213	0.964	10607	tags=24%, list=20%, signal=29%
BIOCARTA_CALCINEURIN_PATHWAY	BIOCARTA_CALCINEURIN_PATHWAY		18	0.286624	0.727699	0.767207	0.708503	0.97	2096	tags=17%, list=4%, signal=17%
BIOCARTA_CELLCYCLE_PATHWAY	BIOCARTA_CELLCYCLE_PATHWAY		23	0.262671	0.728644	0.797674	0.713328	0.97	3430	tags=17%, list=6%, signal=19%
BIOCARTA_LONGEVITY_PATHWAY	BIOCARTA_LONGEVITY_PATHWAY		15	0.258521	0.704627	0.814645	0.717541	0.972	9334	tags=33%, list=17%, signal=40%
BIOCARTA_PTEN_PATHWAY	BIOCARTA_PTEN_PATHWAY		18	0.222787	0.555385	0.893145	0.902055	0.984	14269	tags=33%, list=27%, signal=45%
BIOCARTA_ARF_PATHWAY	BIOCARTA_ARF_PATHWAY		17	0.211341	0.593087	0.924731	0.866257	0.983	12809	tags=35%, list=24%, signal=46%
BIOCARTA_ETS_PATHWAY	BIOCARTA_ETS_PATHWAY		17	0.202448	0.549297	0.938689	0.900642	0.985	4130	tags=12%, list=8%, signal=13%
BIOCARTA_TH1TH2_PATHWAY	BIOCARTA_TH1TH2_PATHWAY		21	0.174452	0.431407	0.958904	0.974697	0.991	426	tags=5%, list=1%, signal=5%
BIOCARTA_CTLA4_PATHWAY	BIOCARTA_CTLA4_PATHWAY		20	0.192736	0.433797	0.961009	0.981858	0.991	9309	tags=15%, list=17%, signal=18%
