# Supplementary material for: Selective targeting BMP2 and 4 in SMAD4 negative esophageal adenocarcinoma inhibits tumor growth and aggressiveness in preclinical models
Source: Cell Oncol (Dordr). 2022 Jul 28;45(4):639–58. doi: 10.1007/s13402-022-00689-2 (PMC9333053; doi:10.1007/s13402-022-00689-2)
Supplement: Supplementary file 15 — (XLSX 10 kb) [file 13402_2022_689_MOESM10_ESM.xlsx]

## Sheet: Sheet1
IC50 (uM)
	Cisplatin	Cisplatin+C4C4	Cisplatin+C8C8
SMAD4(+) ISO76A	171	164	170
SMAD4(-) ISO76A	220	155	172
